# Supplementary material for: Bacterial colonization stimulates a complex physiological response in the immature human intestinal epithelium
Source: eLife journal article supplement (doi:10.7554/elife.29132), 2017-11-06

**A**

**DAY -30 to -1:** Prepare HIOs according to McCracken *et al* (2011) and plate 1 HIO per well (24-well plate) in 50  $\mu$ l Matrigel and 500  $\mu$ l ENR media

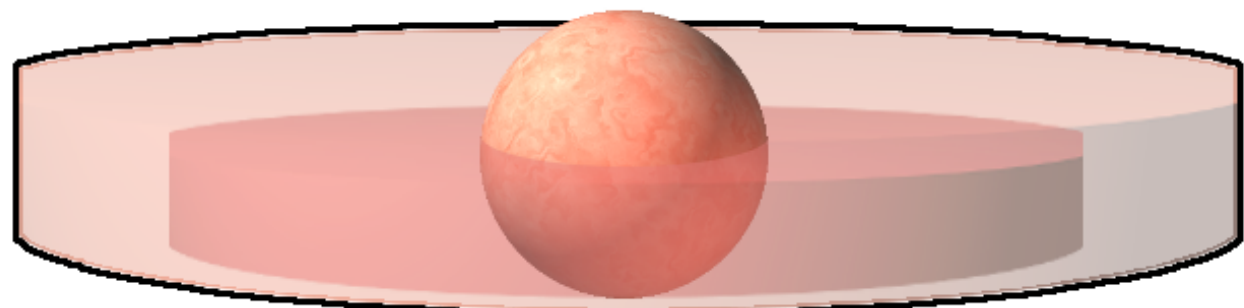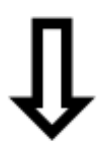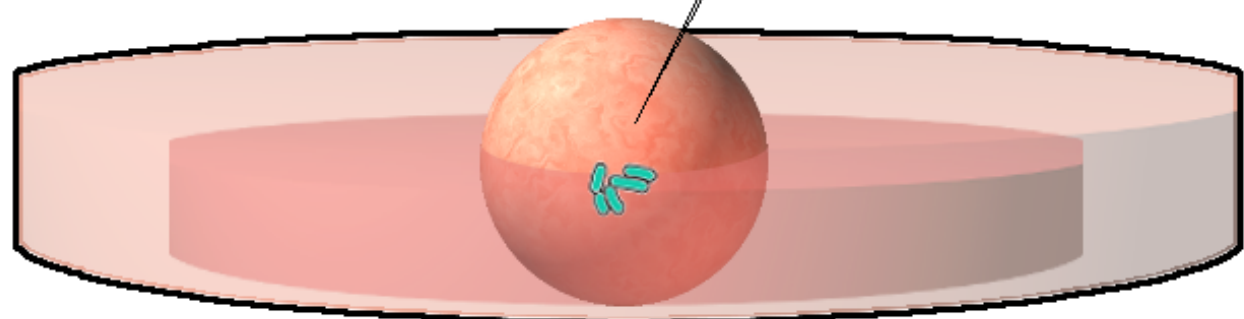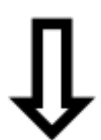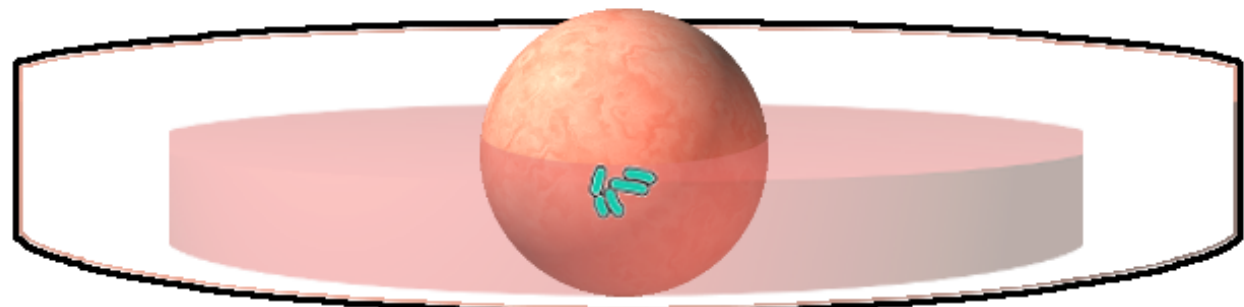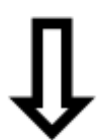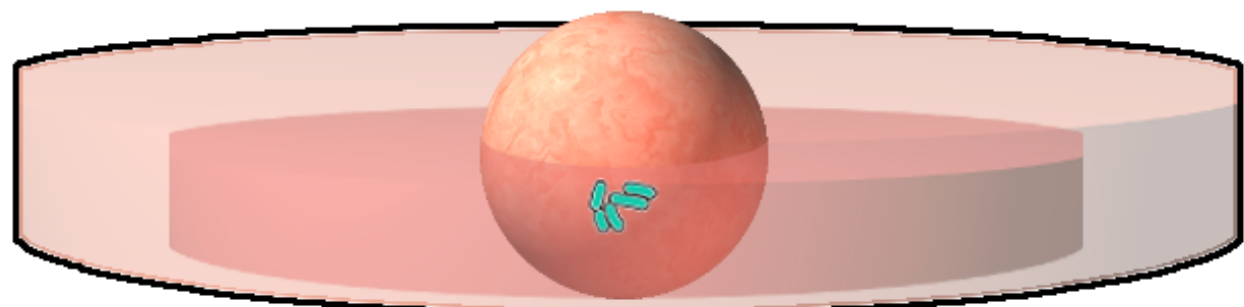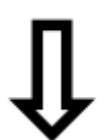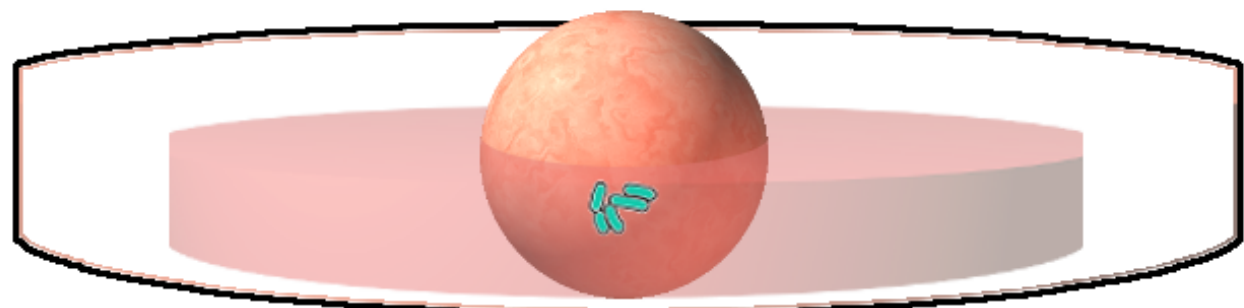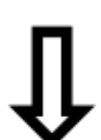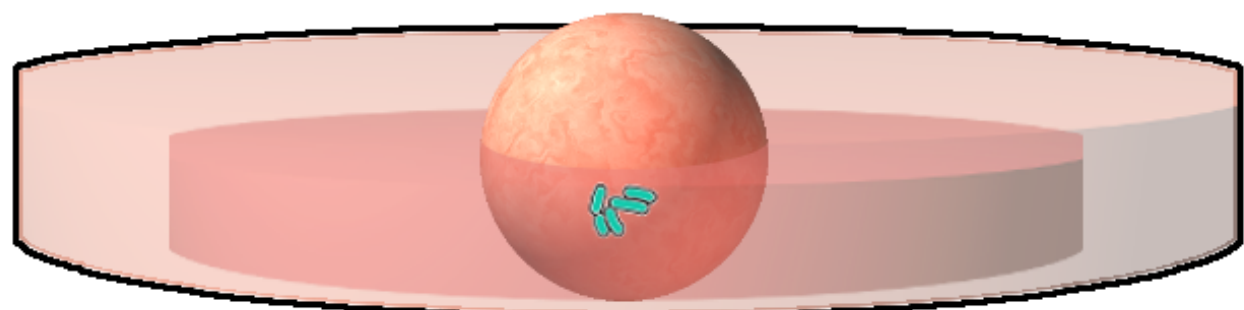

**DAY -1:** Culture *E. coli* from glycerol stock in LB broth overnight at 37° C

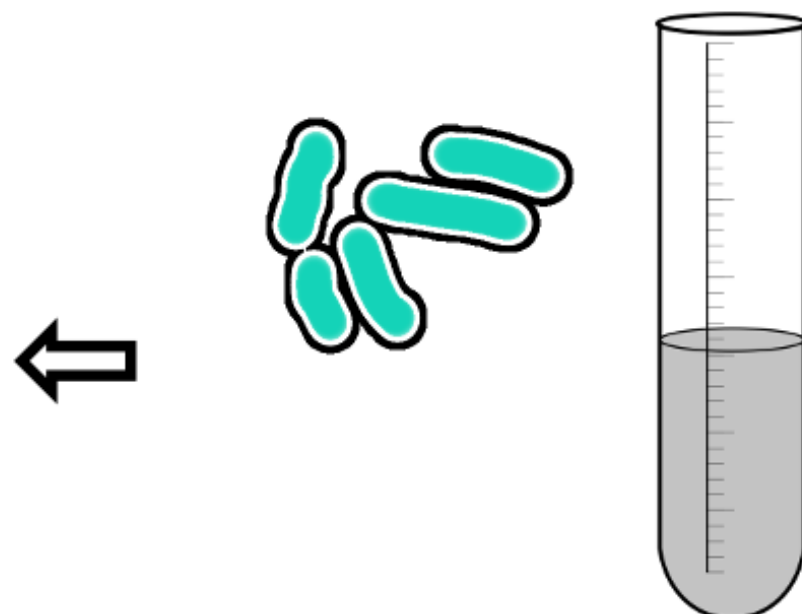

**DAY 0:** Microinject approximately 1  $\mu$ L of the overnight *E. coli* culture (diluted in PBS) into the HIO lumen

**After microinjection:**  
Remove ENR media and wash 1X with sterile PBS.

**0-1 h post-microinjection:**  
Add ENR media containing Pen/Strep mix and incubate at 37 °C for 1 hour

**1 h post-microinjection:**  
Remove ENR containing antibiotics and wash 1X with sterile PBS.

Replace fresh ENR without antibiotics and culture at 37 °C and 5% CO<sub>2</sub>

**B**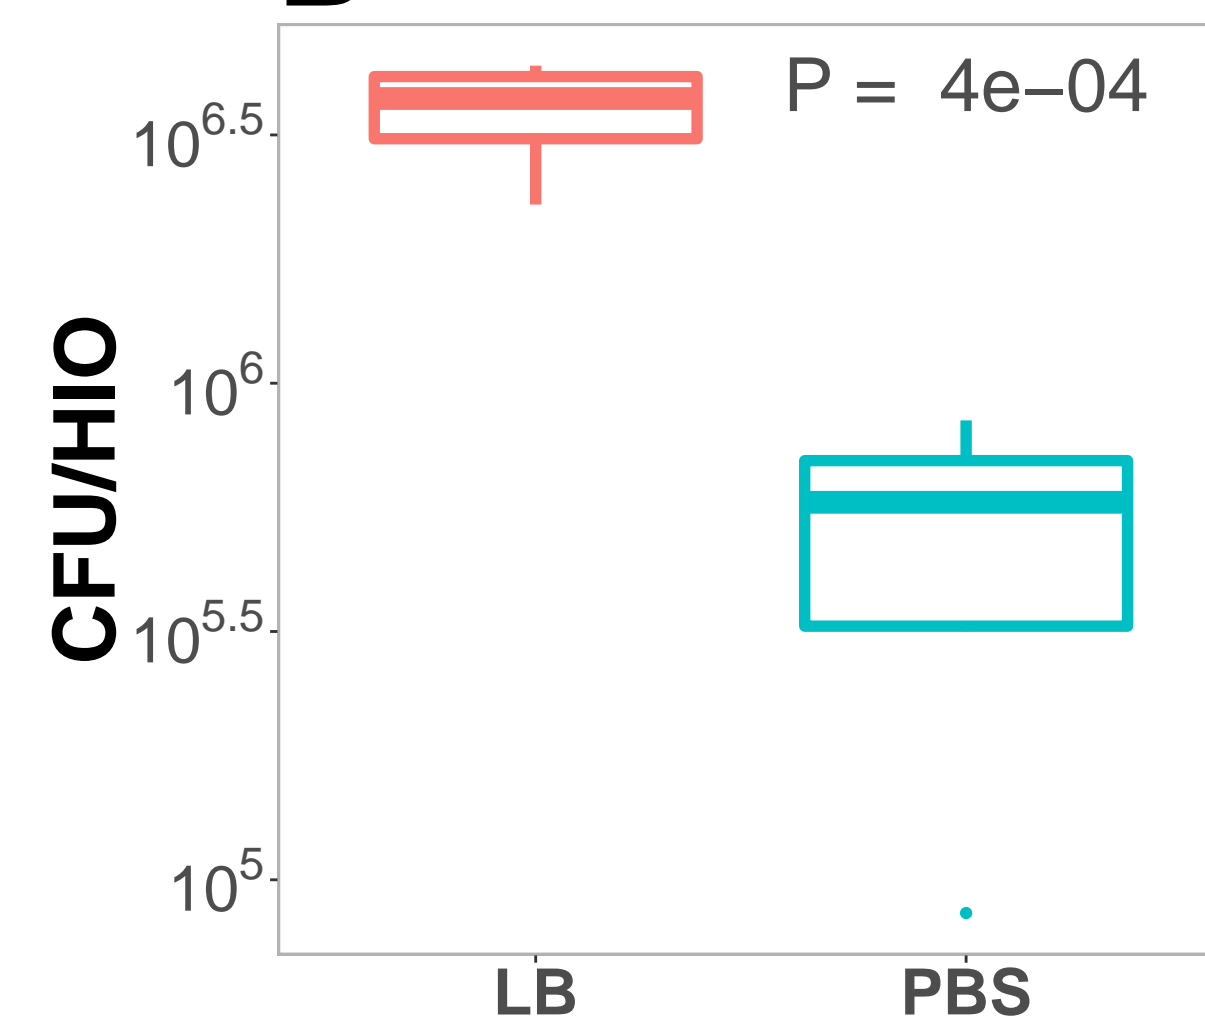**C**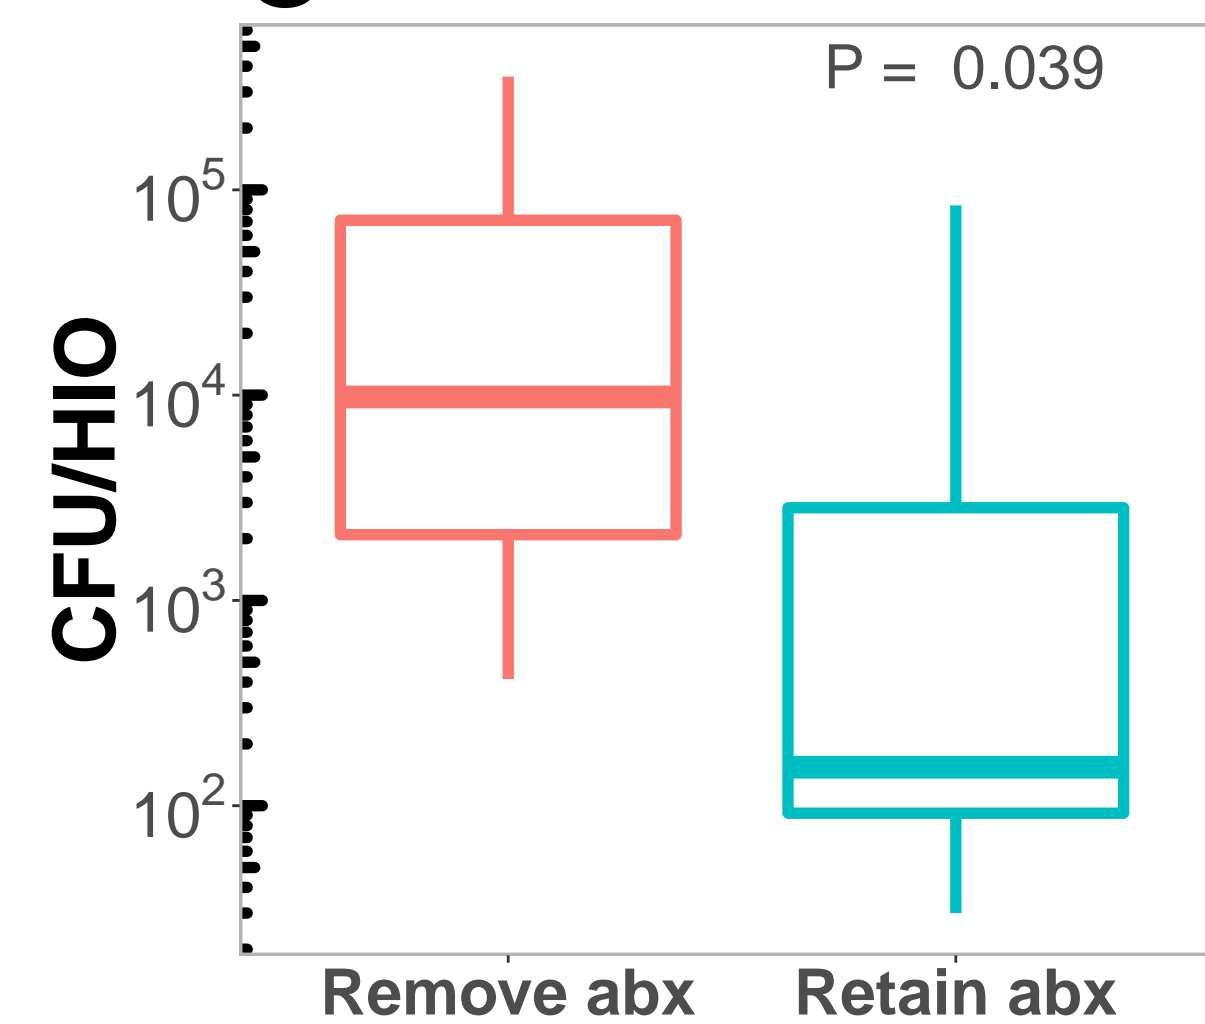**D**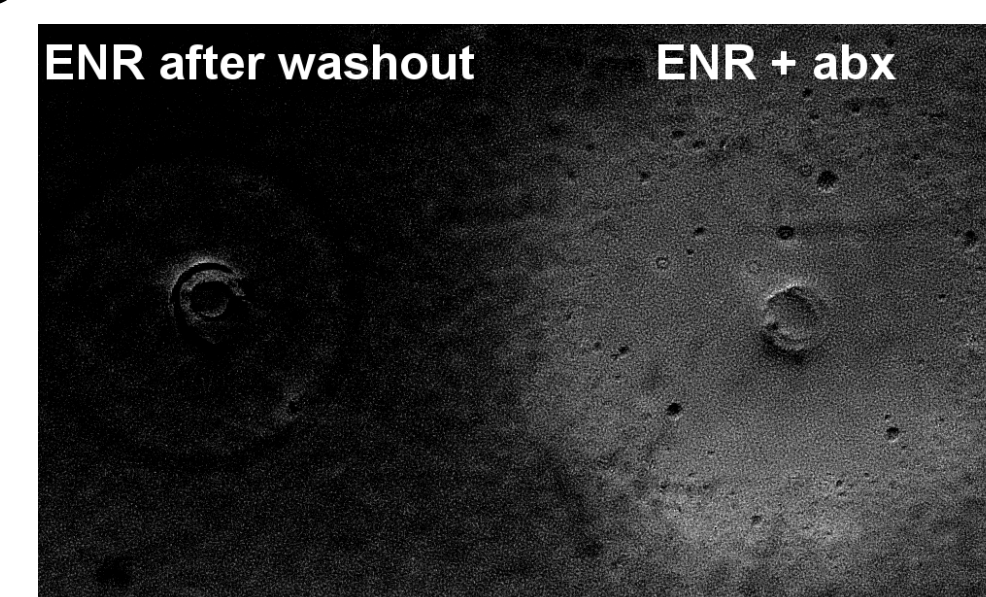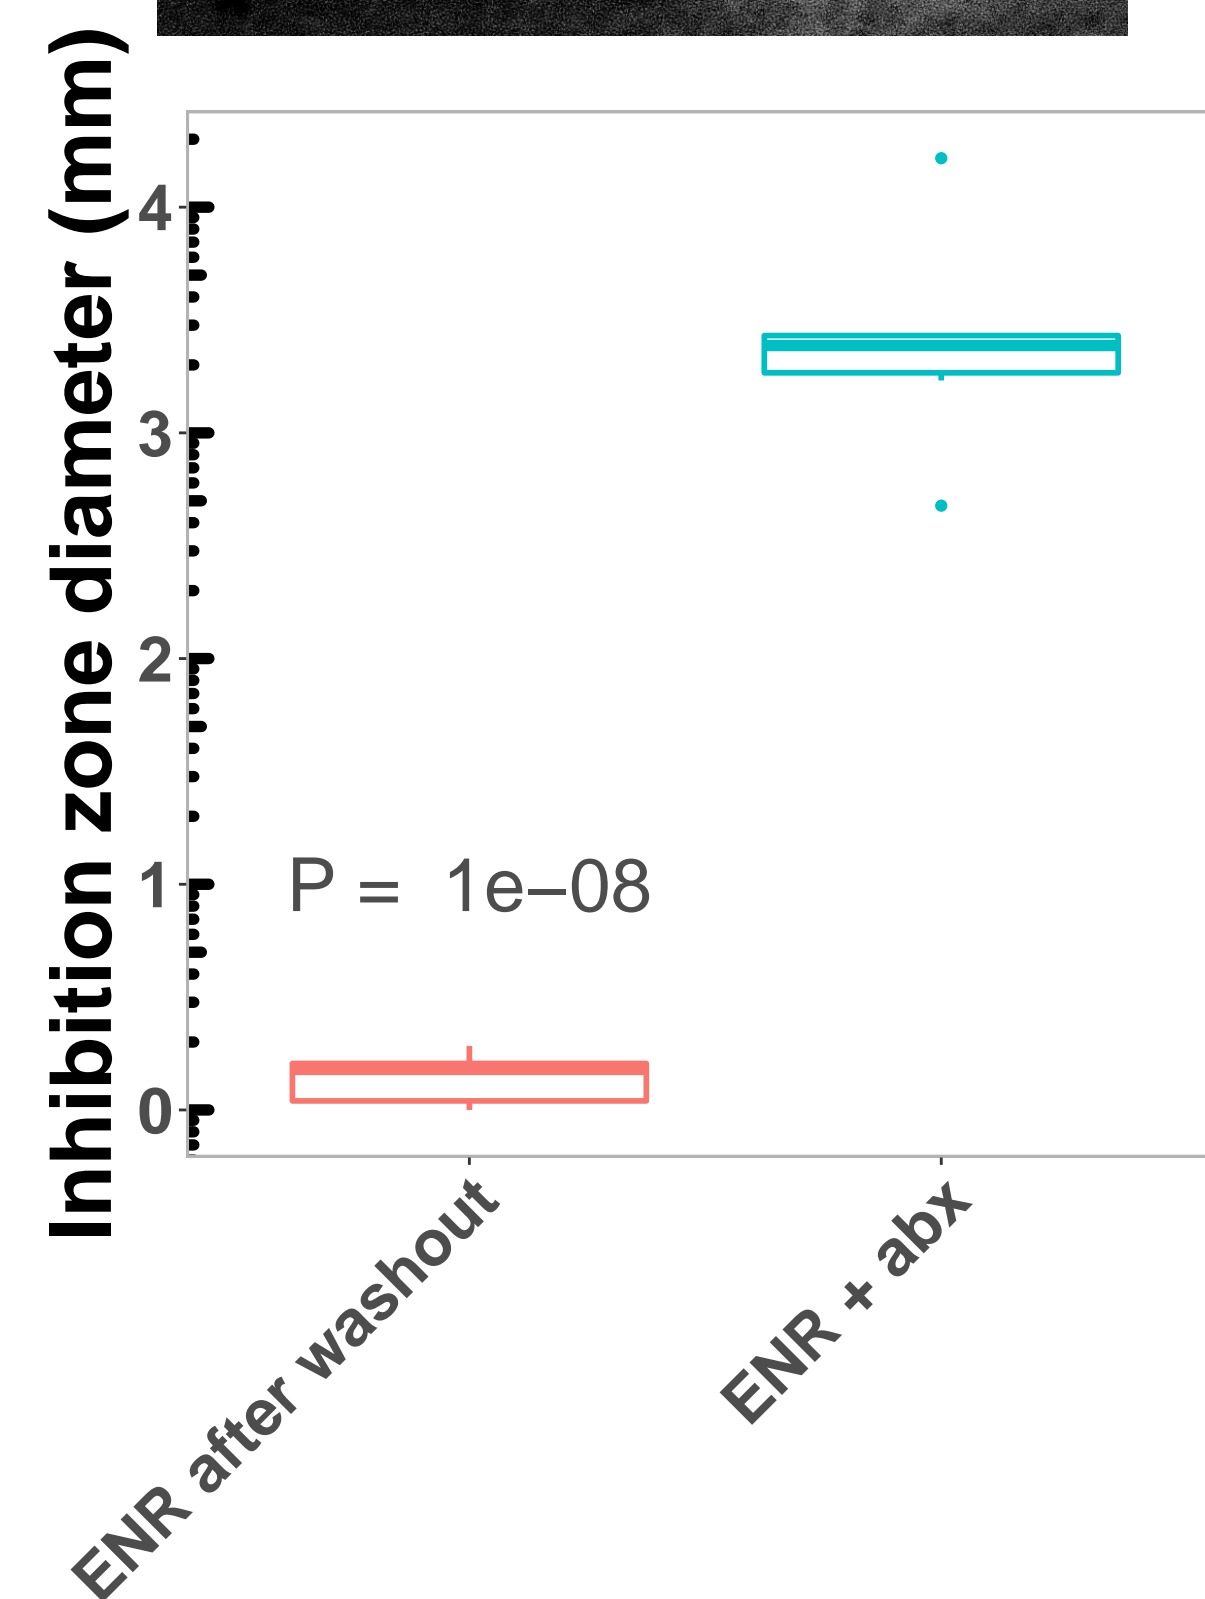

Supplement: supp [file elife_poa_e29132_Figure_1_figure_supplement_3.pdf › elife_poa_e29132_Figure_1_figure_supplement_3.pdf]
