# Supplementary material for: Bacterial colonization stimulates a complex physiological response in the immature human intestinal epithelium
Source: eLife. 2017 Nov 7;6:e29132. doi: 10.7554/eLife.29132 (PMC5711377; doi:10.7554/eLife.29132)
Supplement: Supplementary file 1 [file elife-29132-supp1.xls]

## Sheet: Sheet1
SYMBOL	Gene Set
A1CF	Gene Set I
AADAC	Gene Set I
AATK	Gene Set I
ABHD14B	Gene Set I
ABLIM1	Gene Set I
AC005154.7	Gene Set I
AC007325.2	Gene Set I
AC010980.2	Gene Set I
AC112229.1	Gene Set I
AC127070.1	Gene Set I
ACAA2	Gene Set I
ACAP1	Gene Set I
ACAT2	Gene Set I
ACBD3	Gene Set I
ACE2	Gene Set I
ACKR3	Gene Set I
ACLY	Gene Set I
ACMSD	Gene Set I
ACO1	Gene Set I
ACOT13	Gene Set I
ACOT9	Gene Set I
ACP1	Gene Set I
ACP6	Gene Set I
ACPP	Gene Set I
ACSM3	Gene Set I
ACSS1	Gene Set I
ACSS2	Gene Set I
ACTA2	Gene Set I
ACTB	Gene Set I
ACTG1	Gene Set I
ACTG2	Gene Set I
ACTN1	Gene Set I
ACTR3	Gene Set I
ACVRL1	Gene Set I
ACY1	Gene Set I
ACY3	Gene Set I
ADA	Gene Set I
ADAM2	Gene Set I
ADAM28	Gene Set I
ADAM8	Gene Set I
ADAMTS20	Gene Set I
ADAMTSL4	Gene Set I
ADAMTSL5	Gene Set I
ADCY7	Gene Set I
ADGRD1	Gene Set I
ADGRG6	Gene Set I
ADGRG7	Gene Set I
ADH5	Gene Set I
ADHFE1	Gene Set I
ADM	Gene Set I
ADORA2B	Gene Set I
AES	Gene Set I
AFM	Gene Set I
AFMID	Gene Set I
AFP	Gene Set I
AGAP4	Gene Set I
AGER	Gene Set I
AGMAT	Gene Set I
AGO4	Gene Set I
AGR2	Gene Set I
AGR3	Gene Set I
AGTR1	Gene Set I
AGXT	Gene Set I
AHCYL1	Gene Set I
AHNAK	Gene Set I
AIF1	Gene Set I
AIFM3	Gene Set I
AIM1L	Gene Set I
AIMP1	Gene Set I
AJUBA	Gene Set I
AK4	Gene Set I
AKAP7	Gene Set I
AKNA	Gene Set I
AKR1A1	Gene Set I
AKR7A3	Gene Set I
ALDH18A1	Gene Set I
ALDH3B1	Gene Set I
ALDH8A1	Gene Set I
ALDOA	Gene Set I
ALDOB	Gene Set I
ALDOC	Gene Set I
ALG14	Gene Set I
ALKBH7	Gene Set I
ALOX15B	Gene Set I
ALOX5	Gene Set I
ALS2CL	Gene Set I
AMBP	Gene Set I
AMHR2	Gene Set I
AMOTL2	Gene Set I
ANG	Gene Set I
ANGPT4	Gene Set I
ANGPTL6	Gene Set I
ANK3	Gene Set I
ANKMY2	Gene Set I
ANKRD22	Gene Set I
ANKRD36	Gene Set I
ANKRD37	Gene Set I
ANKS4B	Gene Set I
ANKZF1	Gene Set I
ANO6	Gene Set I
ANO7	Gene Set I
ANP32A	Gene Set I
ANPEP	Gene Set I
ANXA13	Gene Set I
ANXA3	Gene Set I
ANXA9	Gene Set I
AOAH	Gene Set I
AOC3	Gene Set I
AOX1	Gene Set I
AP1S1	Gene Set I
AP3S1	Gene Set I
APAF1	Gene Set I
APH1B	Gene Set I
APLN	Gene Set I
APOA1	Gene Set I
APOA2	Gene Set I
APOA4	Gene Set I
APOBEC1	Gene Set I
APOBEC3C	Gene Set I
APOBEC3D	Gene Set I
APOC1	Gene Set I
APOC2	Gene Set I
APOC3	Gene Set I
APOM	Gene Set I
APOOL	Gene Set I
APP	Gene Set I
APPL2	Gene Set I
AQP1	Gene Set I
AQP10	Gene Set I
AQP12A	Gene Set I
AQP12B	Gene Set I
AQP7	Gene Set I
ARAP1	Gene Set I
ARCN1	Gene Set I
ARF1	Gene Set I
ARF4	Gene Set I
ARFGAP3	Gene Set I
ARFGEF3	Gene Set I
ARG2	Gene Set I
ARHGAP10	Gene Set I
ARHGAP18	Gene Set I
ARHGAP4	Gene Set I
ARHGAP6	Gene Set I
ARHGEF10L	Gene Set I
ARHGEF19	Gene Set I
ARHGEF9	Gene Set I
ARID3A	Gene Set I
ARID3B	Gene Set I
ARID5B	Gene Set I
ARL1	Gene Set I
ARPC2	Gene Set I
ARPC3	Gene Set I
ARRB1	Gene Set I
ARSE	Gene Set I
ARSI	Gene Set I
ASB2	Gene Set I
ASB3	Gene Set I
ASB9	Gene Set I
ASCL2	Gene Set I
ASGR1	Gene Set I
ASGR2	Gene Set I
ASL	Gene Set I
ASPG	Gene Set I
ASPH	Gene Set I
ASS1	Gene Set I
ATF3	Gene Set I
ATG9B	Gene Set I
ATP10B	Gene Set I
ATP13A3	Gene Set I
ATP1A1	Gene Set I
ATP1B1	Gene Set I
ATP2B4	Gene Set I
ATP7A	Gene Set I
ATP8B3	Gene Set I
ATP8B4	Gene Set I
ATXN1	Gene Set I
AUH	Gene Set I
AXDND1	Gene Set I
AXL	Gene Set I
AZGP1	Gene Set I
B3GNT6	Gene Set I
B3GNT7	Gene Set I
B3GNT8	Gene Set I
B4GALNT4	Gene Set I
BACH1	Gene Set I
BAIAP2L1	Gene Set I
BAIAP2L2	Gene Set I
BATF2	Gene Set I
BATF3	Gene Set I
BBC3	Gene Set I
BCAM	Gene Set I
BCAR1	Gene Set I
BCAS1	Gene Set I
BCKDHB	Gene Set I
BCL10	Gene Set I
BCL2L1	Gene Set I
BCL2L15	Gene Set I
BCL3	Gene Set I
BCO1	Gene Set I
BCRP3	Gene Set I
BDKRB1	Gene Set I
BEND3	Gene Set I
BEST4	Gene Set I
BET1	Gene Set I
BET1L	Gene Set I
BIRC3	Gene Set I
BIRC7	Gene Set I
BLOC1S5	Gene Set I
BLVRB	Gene Set I
BMP2	Gene Set I
BMS1P10	Gene Set I
BNC1	Gene Set I
BNIP1	Gene Set I
BNIP3	Gene Set I
BNIP3L	Gene Set I
BRWD3	Gene Set I
BST1	Gene Set I
BST2	Gene Set I
BTBD16	Gene Set I
BTG1	Gene Set I
BTNL3	Gene Set I
BTNL8	Gene Set I
BZW2	Gene Set I
C10orf10	Gene Set I
C11orf49	Gene Set I
C11orf54	Gene Set I
C12orf75	Gene Set I
C14orf1	Gene Set I
C14orf105	Gene Set I
C19orf33	Gene Set I
C19orf67	Gene Set I
C1orf226	Gene Set I
C1RL	Gene Set I
C20orf202	Gene Set I
C2orf61	Gene Set I
C2orf68	Gene Set I
C4BPB	Gene Set I
C4orf3	Gene Set I
C4orf36	Gene Set I
C4orf47	Gene Set I
C6orf132	Gene Set I
C6orf222	Gene Set I
C8orf31	Gene Set I
C8orf4	Gene Set I
C8orf58	Gene Set I
C9orf152	Gene Set I
C9orf72	Gene Set I
CA12	Gene Set I
CA13	Gene Set I
CA3	Gene Set I
CA4	Gene Set I
CA7	Gene Set I
CA9	Gene Set I
CACNA1I	Gene Set I
CACNA2D2	Gene Set I
CALB2	Gene Set I
CALCR	Gene Set I
CALML4	Gene Set I
CALR	Gene Set I
CAMK2N1	Gene Set I
CANX	Gene Set I
CAP1	Gene Set I
CAPG	Gene Set I
CAPN12	Gene Set I
CAPN14	Gene Set I
CAPS	Gene Set I
CAPZA1	Gene Set I
CAPZB	Gene Set I
CARD10	Gene Set I
CARD16	Gene Set I
CARNS1	Gene Set I
CASKIN1	Gene Set I
CASP10	Gene Set I
CASP4	Gene Set I
CASP5	Gene Set I
CAST	Gene Set I
CAV1	Gene Set I
CBFA2T3	Gene Set I
CBLC	Gene Set I
CCDC126	Gene Set I
CCDC149	Gene Set I
CCDC151	Gene Set I
CCDC183	Gene Set I
CCDC187	Gene Set I
CCDC24	Gene Set I
CCDC33	Gene Set I
CCDC6	Gene Set I
CCDC68	Gene Set I
CCDC9	Gene Set I
CCL15	Gene Set I
CCL15-CCL14	Gene Set I
CCL2	Gene Set I
CCNG1	Gene Set I
CCNI	Gene Set I
CCR6	Gene Set I
CCT6P1	Gene Set I
CCT6P3	Gene Set I
CD1D	Gene Set I
CD2AP	Gene Set I
CD300A	Gene Set I
CD300LF	Gene Set I
CD38	Gene Set I
CD3D	Gene Set I
CD3G	Gene Set I
CD46	Gene Set I
CD55	Gene Set I
CD68	Gene Set I
CD69	Gene Set I
CD7	Gene Set I
CD8B	Gene Set I
CD93	Gene Set I
CD96	Gene Set I
CD99P1	Gene Set I
CDA	Gene Set I
CDC42	Gene Set I
CDC42EP5	Gene Set I
CDC42SE2	Gene Set I
CDH1	Gene Set I
CDH10	Gene Set I
CDH12P2	Gene Set I
CDH16	Gene Set I
CDH26	Gene Set I
CDH3	Gene Set I
CDH8	Gene Set I
CDHR2	Gene Set I
CDHR5	Gene Set I
CDK18	Gene Set I
CDK19	Gene Set I
CDKN1C	Gene Set I
CDNF	Gene Set I
CEACAM1	Gene Set I
CEACAM18	Gene Set I
CEACAM7	Gene Set I
CEBPD	Gene Set I
CEBPZOS	Gene Set I
CECR1	Gene Set I
CELF2	Gene Set I
CEP85L	Gene Set I
CES3	Gene Set I
CFAP58	Gene Set I
CFC1	Gene Set I
CFLAR	Gene Set I
CH17-258A22.4	Gene Set I
CHCHD10	Gene Set I
CHCHD2	Gene Set I
CHD3	Gene Set I
CHDH	Gene Set I
CHMP1B2P	Gene Set I
CHP1	Gene Set I
CHRM2	Gene Set I
CHST4	Gene Set I
CHURC1-FNTB	Gene Set I
CIB1	Gene Set I
CIB2	Gene Set I
CIDEB	Gene Set I
CIDEC	Gene Set I
CIR1	Gene Set I
CISH	Gene Set I
CKB	Gene Set I
CLCA1	Gene Set I
CLCF1	Gene Set I
CLCNKA	Gene Set I
CLCNKB	Gene Set I
CLDN1	Gene Set I
CLDN19	Gene Set I
CLDN4	Gene Set I
CLDN6	Gene Set I
CLDN7	Gene Set I
CLEC2B	Gene Set I
CLEC3B	Gene Set I
CLIC1	Gene Set I
CLIC3	Gene Set I
CLIC5	Gene Set I
CLIC6	Gene Set I
CLINT1	Gene Set I
CLMN	Gene Set I
CLRN3	Gene Set I
CMIP	Gene Set I
CMPK1	Gene Set I
CNKSR1	Gene Set I
CNN1	Gene Set I
CNN2	Gene Set I
COBLL1	Gene Set I
COG3	Gene Set I
COG6	Gene Set I
COL11A2	Gene Set I
COL27A1	Gene Set I
COL28A1	Gene Set I
COL4A5	Gene Set I
COL4A6	Gene Set I
COL9A2	Gene Set I
COL9A3	Gene Set I
COLCA2	Gene Set I
COLEC10	Gene Set I
COLEC11	Gene Set I
COMMD10	Gene Set I
COMT	Gene Set I
COPB1	Gene Set I
COPB2	Gene Set I
COPS2	Gene Set I
COPZ1	Gene Set I
CORO1C	Gene Set I
CORO2A	Gene Set I
COTL1	Gene Set I
COX6B2	Gene Set I
COX7A2L	Gene Set I
CP	Gene Set I
CPAMD8	Gene Set I
CPEB2	Gene Set I
CPHL1P	Gene Set I
CPNE5	Gene Set I
CPNE8	Gene Set I
CRABP2	Gene Set I
CRADD	Gene Set I
CRB3	Gene Set I
CREB3L1	Gene Set I
CREB3L2	Gene Set I
CRELD1	Gene Set I
CRIM1	Gene Set I
CRYM	Gene Set I
CSDE1	Gene Set I
CSF2	Gene Set I
CSF3R	Gene Set I
CSNK2A1	Gene Set I
CSRNP1	Gene Set I
CSRP1	Gene Set I
CSRP2	Gene Set I
CST8	Gene Set I
CTD-2005D20.1	Gene Set I
CTD-2114J12.1	Gene Set I
CTD-2623N2.3	Gene Set I
CTD-3088G3.8	Gene Set I
CTDSP1	Gene Set I
CTGF	Gene Set I
CTNNA3	Gene Set I
CTNND1	Gene Set I
CTSC	Gene Set I
CTSS	Gene Set I
CTXN2	Gene Set I
CUL4B	Gene Set I
CUL7	Gene Set I
CXADR	Gene Set I
CXCL10	Gene Set I
CXCL12	Gene Set I
CXCL14	Gene Set I
CXCL16	Gene Set I
CXCL2	Gene Set I
CXCL3	Gene Set I
CXCL8	Gene Set I
CXCR4	Gene Set I
CXorf65	Gene Set I
CYB5A	Gene Set I
CYB5R3	Gene Set I
CYP11A1	Gene Set I
CYP26B1	Gene Set I
CYP2B6	Gene Set I
CYP2W1	Gene Set I
CYP3A5	Gene Set I
CYP4F22	Gene Set I
CYP51A1	Gene Set I
CYR61	Gene Set I
CYSLTR1	Gene Set I
DAB1	Gene Set I
DAB2IP	Gene Set I
DACT2	Gene Set I
DAP	Gene Set I
DAPK1	Gene Set I
DARS	Gene Set I
DAZAP2	Gene Set I
DBNDD1	Gene Set I
DCAF5	Gene Set I
DCP2	Gene Set I
DCTN6	Gene Set I
DDAH1	Gene Set I
DDAH2	Gene Set I
DDC	Gene Set I
DDIT3	Gene Set I
DDT	Gene Set I
DDX60	Gene Set I
DENND1A	Gene Set I
DENND2D	Gene Set I
DENND3	Gene Set I
DENND4C	Gene Set I
DEPTOR	Gene Set I
DES	Gene Set I
DGAT1	Gene Set I
DGKH	Gene Set I
DHCR7	Gene Set I
DHDH	Gene Set I
DIAPH2	Gene Set I
DKK4	Gene Set I
DMBT1	Gene Set I
DMD	Gene Set I
DMTN	Gene Set I
DNAH11	Gene Set I
DNAH5	Gene Set I
DNAJB13	Gene Set I
DNAJB9	Gene Set I
DNASE1	Gene Set I
DNASE2B	Gene Set I
DNM2	Gene Set I
DOCK6	Gene Set I
DOK4	Gene Set I
DPEP1	Gene Set I
DPH6	Gene Set I
DPP10	Gene Set I
DPP4	Gene Set I
DPYSL2	Gene Set I
DRAM1	Gene Set I
DRAM2	Gene Set I
DRD2	Gene Set I
DRP2	Gene Set I
DSCAML1	Gene Set I
DSG2	Gene Set I
DSG4	Gene Set I
DSP	Gene Set I
DSTN	Gene Set I
DTWD1	Gene Set I
DUOXA1	Gene Set I
DUOXA2	Gene Set I
DUS4L	Gene Set I
DUSP1	Gene Set I
DUSP3	Gene Set I
DUSP5	Gene Set I
DUSP8	Gene Set I
DUSP9	Gene Set I
DYSF	Gene Set I
E2F5	Gene Set I
EAF2	Gene Set I
EBF4	Gene Set I
EBI3	Gene Set I
EEF1A1	Gene Set I
EEF1A1P11	Gene Set I
EEF1A1P12	Gene Set I
EEF1A1P13	Gene Set I
EEF1A1P9	Gene Set I
EFEMP1	Gene Set I
EFNA1	Gene Set I
EFNA2	Gene Set I
EFNB1	Gene Set I
EGFL7	Gene Set I
EGFL8	Gene Set I
EGLN1	Gene Set I
EGLN3	Gene Set I
EHD2	Gene Set I
EIF2S3	Gene Set I
EIF3E	Gene Set I
EIF3H	Gene Set I
EIF3M	Gene Set I
EIF4A2	Gene Set I
EIF4A2P3	Gene Set I
EIF4BP7	Gene Set I
EIF4H	Gene Set I
ELF4	Gene Set I
ELFN2	Gene Set I
ELL	Gene Set I
EMC2	Gene Set I
EML2	Gene Set I
EMP3	Gene Set I
ENKUR	Gene Set I
ENO1	Gene Set I
ENO2	Gene Set I
ENPP7	Gene Set I
ENTPD2	Gene Set I
ENTPD8	Gene Set I
EPAS1	Gene Set I
EPB41L1	Gene Set I
EPCAM	Gene Set I
EPHX2	Gene Set I
EPS8L1	Gene Set I
EPSTI1	Gene Set I
ERBB2	Gene Set I
ERGIC1	Gene Set I
ERICH4	Gene Set I
ERO1A	Gene Set I
ERO1B	Gene Set I
ERP27	Gene Set I
ERP44	Gene Set I
ERRFI1	Gene Set I
ESPN	Gene Set I
ESPNP	Gene Set I
ESYT2	Gene Set I
ETFA	Gene Set I
ETS2	Gene Set I
ETV4	Gene Set I
EVX1	Gene Set I
EXOC3L4	Gene Set I
EZR	Gene Set I
F10	Gene Set I
F2	Gene Set I
F2RL1	Gene Set I
F7	Gene Set I
FA2H	Gene Set I
FABP1	Gene Set I
FABP2	Gene Set I
FABP3	Gene Set I
FABP4	Gene Set I
FABP6	Gene Set I
FADS6	Gene Set I
FAHD2P1	Gene Set I
FAM107B	Gene Set I
FAM109B	Gene Set I
FAM114A1	Gene Set I
FAM117A	Gene Set I
FAM127B	Gene Set I
FAM131C	Gene Set I
FAM13A	Gene Set I
FAM149A	Gene Set I
FAM153A	Gene Set I
FAM153C	Gene Set I
FAM160A1	Gene Set I
FAM162A	Gene Set I
FAM167B	Gene Set I
FAM177A1	Gene Set I
FAM177B	Gene Set I
FAM200B	Gene Set I
FAM210A	Gene Set I
FAM213B	Gene Set I
FAM219A	Gene Set I
FAM221A	Gene Set I
FAM222B	Gene Set I
FAM231D	Gene Set I
FAM3B	Gene Set I
FAM46A	Gene Set I
FAM46C	Gene Set I
FAM47E-STBD1	Gene Set I
FAM60A	Gene Set I
FAM65C	Gene Set I
FAM69B	Gene Set I
FBLIM1	Gene Set I
FBXL8	Gene Set I
FBXO2	Gene Set I
FBXO32	Gene Set I
FBXO34	Gene Set I
FBXO46	Gene Set I
FBXO6	Gene Set I
FCER1G	Gene Set I
FCGR2A	Gene Set I
FCHO1	Gene Set I
FDPS	Gene Set I
FEM1C	Gene Set I
FER1L4	Gene Set I
FGA	Gene Set I
FGB	Gene Set I
FGD4	Gene Set I
FGF11	Gene Set I
FGF7	Gene Set I
FGFR2	Gene Set I
FHL2	Gene Set I
FHL3	Gene Set I
FILIP1L	Gene Set I
FKBP11	Gene Set I
FKBP9	Gene Set I
FKBP9P1	Gene Set I
FLRT3	Gene Set I
FLVCR1	Gene Set I
FMNL2	Gene Set I
FMO1	Gene Set I
FMO5	Gene Set I
FN3K	Gene Set I
FNDC11	Gene Set I
FOS	Gene Set I
FOSB	Gene Set I
FOSL2	Gene Set I
FOXA3	Gene Set I
FOXH1	Gene Set I
FOXN2	Gene Set I
FOXO3	Gene Set I
FOXO4	Gene Set I
FREM2	Gene Set I
FRMD1	Gene Set I
FRMD3	Gene Set I
FRMPD2	Gene Set I
FRY	Gene Set I
FRZB	Gene Set I
FSBP	Gene Set I
FST	Gene Set I
FUNDC1	Gene Set I
FUNDC2	Gene Set I
FUNDC2P1	Gene Set I
FUOM	Gene Set I
FUT11	Gene Set I
FUT2	Gene Set I
FXR1	Gene Set I
GABPB2	Gene Set I
GABRE	Gene Set I
GAL3ST1	Gene Set I
GAL3ST4	Gene Set I
GALE	Gene Set I
GALM	Gene Set I
GALNT3	Gene Set I
GALNT4	Gene Set I
GALNT5	Gene Set I
GAPDHP35	Gene Set I
GATAD1	Gene Set I
GBA3	Gene Set I
GBAS	Gene Set I
GBE1	Gene Set I
GBP1	Gene Set I
GBP2	Gene Set I
GBP3	Gene Set I
GBP5	Gene Set I
GCA	Gene Set I
GCC2	Gene Set I
GCKR	Gene Set I
GCNT1	Gene Set I
GCNT2	Gene Set I
GCNT3	Gene Set I
GCNT4	Gene Set I
GDNF	Gene Set I
GDPD3	Gene Set I
GFPT1	Gene Set I
GGN	Gene Set I
GGT1	Gene Set I
GGT5	Gene Set I
GHDC	Gene Set I
GIPC3	Gene Set I
GIPR	Gene Set I
GJB1	Gene Set I
GJC2	Gene Set I
GK	Gene Set I
GLIS3	Gene Set I
GLRX	Gene Set I
GLTPD2	Gene Set I
GLUD1	Gene Set I
GNA15	Gene Set I
GNAI3	Gene Set I
GNAS	Gene Set I
GNG5	Gene Set I
GNG8	Gene Set I
GOLGA4	Gene Set I
GOLGA6L10	Gene Set I
GOLGA6L5P	Gene Set I
GOLM1	Gene Set I
GOLPH3	Gene Set I
GOLPH3L	Gene Set I
GP2	Gene Set I
GPA33	Gene Set I
GPBAR1	Gene Set I
GPD1	Gene Set I
GPER1	Gene Set I
GPI	Gene Set I
GPR132	Gene Set I
GPR160	Gene Set I
GPR183	Gene Set I
GPR20	Gene Set I
GPR37L1	Gene Set I
GPRC5A	Gene Set I
GPRIN2	Gene Set I
GPSM3	Gene Set I
GPT	Gene Set I
GPX3	Gene Set I
GRB7	Gene Set I
GREM2	Gene Set I
GRIA4	Gene Set I
GRIN2D	Gene Set I
GRIP2	Gene Set I
GRSF1	Gene Set I
GSAP	Gene Set I
GSDMB	Gene Set I
GSG1	Gene Set I
GSTO1	Gene Set I
GTF2H2B	Gene Set I
GTPBP2	Gene Set I
GUCA1A	Gene Set I
GUCA2A	Gene Set I
GUCA2B	Gene Set I
GUCY1A2	Gene Set I
GUCY1B3	Gene Set I
GYG2	Gene Set I
GYS1	Gene Set I
HACD4	Gene Set I
HACL1	Gene Set I
HAND1	Gene Set I
HAND2	Gene Set I
HAPLN4	Gene Set I
HAS3	Gene Set I
HAVCR1	Gene Set I
HBBP1	Gene Set I
HBD	Gene Set I
HBG2	Gene Set I
HCAR1	Gene Set I
HCAR3	Gene Set I
HDAC6	Gene Set I
HDGF	Gene Set I
HEBP2	Gene Set I
HELB	Gene Set I
HELZ2	Gene Set I
HHIPL1	Gene Set I
HHLA1	Gene Set I
HHLA2	Gene Set I
HIF3A	Gene Set I
HILPDA	Gene Set I
HIST1H1C	Gene Set I
HK2	Gene Set I
HKDC1	Gene Set I
HLA-DMA	Gene Set I
HLA-DQB1	Gene Set I
HLA-DRB1	Gene Set I
HLA-DRB3	Gene Set I
HLA-DRB5	Gene Set I
HLA-E	Gene Set I
HLA-F	Gene Set I
HLA-V	Gene Set I
HMBOX1	Gene Set I
HMGA2	Gene Set I
HMGCL	Gene Set I
HMGCR	Gene Set I
HMGCS1	Gene Set I
HMGCS2	Gene Set I
HMGN2P46	Gene Set I
HNF4G	Gene Set I
HNMT	Gene Set I
HOMEZ	Gene Set I
HOXA11	Gene Set I
HOXD10	Gene Set I
HPCAL1	Gene Set I
HPGD	Gene Set I
HPN	Gene Set I
HRASLS2	Gene Set I
HSBP1	Gene Set I
HSBP1L1	Gene Set I
HSD17B12	Gene Set I
HSD17B14	Gene Set I
HSD17B7	Gene Set I
HSD17B8	Gene Set I
HSH2D	Gene Set I
HSP90AB1	Gene Set I
HSP90B1	Gene Set I
HSPA2	Gene Set I
HSPA5	Gene Set I
HSPB1	Gene Set I
HSPB6	Gene Set I
HSPB8	Gene Set I
HTR1B	Gene Set I
HTRA3	Gene Set I
HYAL1	Gene Set I
IARS2	Gene Set I
IBTK	Gene Set I
ICAM1	Gene Set I
IDH2	Gene Set I
IDI1	Gene Set I
IDO1	Gene Set I
IER3	Gene Set I
IFIH1	Gene Set I
IFITM1	Gene Set I
IFITM2	Gene Set I
IFITM3	Gene Set I
IFNAR2	Gene Set I
IFNGR2	Gene Set I
IFT172	Gene Set I
IGDCC3	Gene Set I
IGDCC4	Gene Set I
IGF2BP2	Gene Set I
IGFBP2	Gene Set I
IGFBP3	Gene Set I
IGLON5	Gene Set I
IGSF1	Gene Set I
IGSF23	Gene Set I
IL10RB	Gene Set I
IL11	Gene Set I
IL15	Gene Set I
IL17RE	Gene Set I
IL17REL	Gene Set I
IL2RB	Gene Set I
IL2RG	Gene Set I
IL32	Gene Set I
IL34	Gene Set I
IL36G	Gene Set I
IL37	Gene Set I
IL4R	Gene Set I
IL7R	Gene Set I
ILK	Gene Set I
INHA	Gene Set I
INMT	Gene Set I
INO80C	Gene Set I
INSIG1	Gene Set I
INSIG2	Gene Set I
INTS6L	Gene Set I
IPMK	Gene Set I
IQGAP1	Gene Set I
IQSEC2	Gene Set I
IQSEC3	Gene Set I
IRF2BP2	Gene Set I
IRF6	Gene Set I
IRF7	Gene Set I
IRF9	Gene Set I
ISG20	Gene Set I
ISM2	Gene Set I
ITGA5	Gene Set I
ITGB2	Gene Set I
ITIH3	Gene Set I
ITPR3	Gene Set I
ITSN1	Gene Set I
IYD	Gene Set I
JADE2	Gene Set I
JAML	Gene Set I
JAZF1	Gene Set I
JMJD1C	Gene Set I
JPH2	Gene Set I
JUNB	Gene Set I
JUP	Gene Set I
KALRN	Gene Set I
KANK1	Gene Set I
KAZN	Gene Set I
KBTBD3	Gene Set I
KCNH2	Gene Set I
KCNH8	Gene Set I
KCNJ13	Gene Set I
KCNJ16	Gene Set I
KCNN4	Gene Set I
KCNQ4	Gene Set I
KCTD9	Gene Set I
KDELR1	Gene Set I
KDELR2	Gene Set I
KDM2A	Gene Set I
KDM3A	Gene Set I
KDM4B	Gene Set I
KDM4C	Gene Set I
KDM5B	Gene Set I
KDM6A	Gene Set I
KIAA1217	Gene Set I
KIF12	Gene Set I
KIF16B	Gene Set I
KISS1R	Gene Set I
KIT	Gene Set I
KITLG	Gene Set I
KLF11	Gene Set I
KLF3	Gene Set I
KLF6	Gene Set I
KLF9	Gene Set I
KLHDC7A	Gene Set I
KLHL2P1	Gene Set I
KLHL3	Gene Set I
KLK1	Gene Set I
KMT5B	Gene Set I
KRT20	Gene Set I
KRTAP5-10	Gene Set I
L1TD1	Gene Set I
LACE1	Gene Set I
LAMA1	Gene Set I
LAMA5	Gene Set I
LAPTM5	Gene Set I
LASP1	Gene Set I
LCK	Gene Set I
LCN12	Gene Set I
LDHA	Gene Set I
LDHD	Gene Set I
LEFTY1	Gene Set I
LEMD1	Gene Set I
LENG9	Gene Set I
LGALS14	Gene Set I
LGALS2	Gene Set I
LGALS9B	Gene Set I
LGALS9C	Gene Set I
LGALSL	Gene Set I
LGI4	Gene Set I
LIMA1	Gene Set I
LIMS1	Gene Set I
LIMS2	Gene Set I
LINC01619	Gene Set I
LINGO1	Gene Set I
LIPC	Gene Set I
LITAF	Gene Set I
LIX1	Gene Set I
LMAN1	Gene Set I
LMNTD2	Gene Set I
LMO4	Gene Set I
LMOD1	Gene Set I
LNX1	Gene Set I
LNX2	Gene Set I
LOX	Gene Set I
LOXL3	Gene Set I
LPAR6	Gene Set I
LPCAT4	Gene Set I
LPIN3	Gene Set I
LPP	Gene Set I
LRCH1	Gene Set I
LRG1	Gene Set I
LRIF1	Gene Set I
LRIG3	Gene Set I
LRP4	Gene Set I
LRRC32	Gene Set I
LRRC37A11P	Gene Set I
LRRC66	Gene Set I
LRRFIP1	Gene Set I
LRRK1	Gene Set I
LSAMP	Gene Set I
LSM12	Gene Set I
LSM14A	Gene Set I
LSMEM1	Gene Set I
LTB	Gene Set I
LTF	Gene Set I
LURAP1L	Gene Set I
LY6E	Gene Set I
LY6H	Gene Set I
LYSMD3	Gene Set I
LZIC	Gene Set I
LZTFL1	Gene Set I
LZTS2	Gene Set I
MAFF	Gene Set I
MAGI1	Gene Set I
MALRD1	Gene Set I
MALT1	Gene Set I
MAML2	Gene Set I
MAOA	Gene Set I
MAP3K6	Gene Set I
MAP3K8	Gene Set I
MAP7	Gene Set I
MAPK14	Gene Set I
MAPK3	Gene Set I
MAPK4	Gene Set I
MAPRE2	Gene Set I
MARCKS	Gene Set I
MASP1	Gene Set I
MATN1	Gene Set I
MBNL2	Gene Set I
MCEE	Gene Set I
MCHR1	Gene Set I
MCTS1	Gene Set I
MCU	Gene Set I
MDK	Gene Set I
MEI4	Gene Set I
MEP1A	Gene Set I
METTL21B	Gene Set I
MFSD7	Gene Set I
MGAM	Gene Set I
MGAT3	Gene Set I
MIA2	Gene Set I
MIDN	Gene Set I
MIF	Gene Set I
MKLN1	Gene Set I
MKNK2	Gene Set I
MLKL	Gene Set I
MLLT3	Gene Set I
MMEL1	Gene Set I
MMP19	Gene Set I
MMP3	Gene Set I
MMRN2	Gene Set I
MOB3A	Gene Set I
MOGAT2	Gene Set I
MOGAT3	Gene Set I
MON2	Gene Set I
MORF4L2	Gene Set I
MPI	Gene Set I
MPP5	Gene Set I
MPZL2	Gene Set I
MRGPRF	Gene Set I
MRPL30	Gene Set I
MRPL42	Gene Set I
MRPS36	Gene Set I
MRVI1	Gene Set I
MS4A8	Gene Set I
MSH5	Gene Set I
MSH5-SAPCD1	Gene Set I
MSI2	Gene Set I
MSMO1	Gene Set I
MSRB1	Gene Set I
MST1	Gene Set I
MST1L	Gene Set I
MST1P2	Gene Set I
MTCL1	Gene Set I
MTFR1	Gene Set I
MTMR11	Gene Set I
MTMR9LP	Gene Set I
MTRNR2L1	Gene Set I
MTRNR2L10	Gene Set I
MTRNR2L11	Gene Set I
MTRNR2L12	Gene Set I
MTRNR2L4	Gene Set I
MTRNR2L6	Gene Set I
MTRNR2L8	Gene Set I
MUC12	Gene Set I
MUC13	Gene Set I
MUC2	Gene Set I
MUC3A	Gene Set I
MVP	Gene Set I
MXI1	Gene Set I
MYADM	Gene Set I
MYCN	Gene Set I
MYL12A	Gene Set I
MYL12B	Gene Set I
MYL3	Gene Set I
MYL6	Gene Set I
MYL9	Gene Set I
MYLK	Gene Set I
MYO10	Gene Set I
MYO15A	Gene Set I
MYO15B	Gene Set I
MYO18A	Gene Set I
MYO1A	Gene Set I
MYO1B	Gene Set I
MYO1C	Gene Set I
MYO3A	Gene Set I
MYO6	Gene Set I
MYOCD	Gene Set I
MYOF	Gene Set I
MYOM1	Gene Set I
MYRF	Gene Set I
N4BP2L2	Gene Set I
N4BP3	Gene Set I
NACA	Gene Set I
NACAP1	Gene Set I
NADSYN1	Gene Set I
NAMPT	Gene Set I
NAMPTP1	Gene Set I
NANS	Gene Set I
NAP1L4P1	Gene Set I
NAT6	Gene Set I
NAT8	Gene Set I
NAV2	Gene Set I
NBR1	Gene Set I
NCKAP5	Gene Set I
NCMAP	Gene Set I
NCOA4	Gene Set I
NDFIP2	Gene Set I
NDNF	Gene Set I
NDRG1	Gene Set I
NDUFA4L2	Gene Set I
NEDD4L	Gene Set I
NEDD9	Gene Set I
NEK3	Gene Set I
NEK6	Gene Set I
NET1	Gene Set I
NEURL1	Gene Set I
NEURL1B	Gene Set I
NEURL3	Gene Set I
NFE2	Gene Set I
NFE2L3	Gene Set I
NFIL3	Gene Set I
NFKB2	Gene Set I
NFKBIA	Gene Set I
NFKBIZ	Gene Set I
NIPSNAP1	Gene Set I
NKX3-2	Gene Set I
NLRX1	Gene Set I
NMD3	Gene Set I
NME4	Gene Set I
NMRK1	Gene Set I
NMUR2	Gene Set I
NOCT	Gene Set I
NOSTRIN	Gene Set I
NOTCH3	Gene Set I
NPC1	Gene Set I
NPC1L1	Gene Set I
NPEPPS	Gene Set I
NPIPB11	Gene Set I
NPIPB12	Gene Set I
NPPB	Gene Set I
NPR3	Gene Set I
NR1H3	Gene Set I
NR1H4	Gene Set I
NR4A1	Gene Set I
NR5A2	Gene Set I
NRAS	Gene Set I
NRBP2	Gene Set I
NSDHL	Gene Set I
NSMCE1	Gene Set I
NSUN7	Gene Set I
NTF4	Gene Set I
NTS	Gene Set I
NUAK2	Gene Set I
NUDT4	Gene Set I
NUMB	Gene Set I
NXNL2	Gene Set I
OBSCN	Gene Set I
OBSL1	Gene Set I
OCLN	Gene Set I
ODF3L1	Gene Set I
OFD1	Gene Set I
OPRK1	Gene Set I
OPTN	Gene Set I
OR2A7	Gene Set I
OR52K3P	Gene Set I
OSER1	Gene Set I
OSMR	Gene Set I
OSTC	Gene Set I
OTC	Gene Set I
OTOF	Gene Set I
OTOP3	Gene Set I
OTUD1	Gene Set I
OVOL1	Gene Set I
OVOS2	Gene Set I
OXSR1	Gene Set I
OXTR	Gene Set I
P2RX4	Gene Set I
P3H2	Gene Set I
P4HA1	Gene Set I
P4HA2	Gene Set I
P4HB	Gene Set I
PACS1	Gene Set I
PADI2	Gene Set I
PAG1	Gene Set I
PAH	Gene Set I
PALMD	Gene Set I
PAPSS2	Gene Set I
PAQR7	Gene Set I
PAQR8	Gene Set I
PARD3	Gene Set I
PARM1	Gene Set I
PARP10	Gene Set I
PARP3	Gene Set I
PARP9	Gene Set I
PARVB	Gene Set I
PATJ	Gene Set I
PATL1	Gene Set I
PBX2	Gene Set I
PBX4	Gene Set I
PC	Gene Set I
PCBP1	Gene Set I
PCCA	Gene Set I
PCDH18	Gene Set I
PCGF5	Gene Set I
PCIF1	Gene Set I
PCK1	Gene Set I
PCSK6	Gene Set I
PDCD4	Gene Set I
PDE11A	Gene Set I
PDE1A	Gene Set I
PDE6B	Gene Set I
PDE8A	Gene Set I
PDE9A	Gene Set I
PDIA3	Gene Set I
PDIA4	Gene Set I
PDIA5	Gene Set I
PDIA6	Gene Set I
PDK1	Gene Set I
PDK3	Gene Set I
PDLIM1	Gene Set I
PDLIM2	Gene Set I
PDLIM5	Gene Set I
PDX1	Gene Set I
PDXDC1	Gene Set I
PDXK	Gene Set I
PDZK1	Gene Set I
PDZRN4	Gene Set I
PELI1	Gene Set I
PELI2	Gene Set I
PER2	Gene Set I
PER3	Gene Set I
PFKFB4	Gene Set I
PFKL	Gene Set I
PFKP	Gene Set I
PFN1	Gene Set I
PGAM1	Gene Set I
PGC	Gene Set I
PGGHG	Gene Set I
PGK1	Gene Set I
PGM1	Gene Set I
PGM3	Gene Set I
PGRMC1	Gene Set I
PHF1	Gene Set I
PHF10	Gene Set I
PHKA2	Gene Set I
PHLPP1	Gene Set I
PHYH	Gene Set I
PHYKPL	Gene Set I
PIAS2	Gene Set I
PIGA	Gene Set I
PIGZ	Gene Set I
PIK3C2A	Gene Set I
PIK3CB	Gene Set I
PIM3	Gene Set I
PINLYP	Gene Set I
PITX2	Gene Set I
PIWIL2	Gene Set I
PJA1	Gene Set I
PJA2	Gene Set I
PKD1L1	Gene Set I
PKIB	Gene Set I
PKN2	Gene Set I
PKP2	Gene Set I
PLA2G16	Gene Set I
PLA2G2A	Gene Set I
PLA2G3	Gene Set I
PLA2G4F	Gene Set I
PLAC8	Gene Set I
PLAT	Gene Set I
PLAU	Gene Set I
PLBD1	Gene Set I
PLCB2	Gene Set I
PLCB4	Gene Set I
PLCH1	Gene Set I
PLEK2	Gene Set I
PLEKHA1	Gene Set I
PLEKHA2	Gene Set I
PLEKHF2	Gene Set I
PLEKHG5	Gene Set I
PLIN1	Gene Set I
PLIN3	Gene Set I
PLIN4	Gene Set I
PLIN5	Gene Set I
PLOD1	Gene Set I
PLOD2	Gene Set I
PLOD3	Gene Set I
PLS1	Gene Set I
PLS3	Gene Set I
PLSCR1	Gene Set I
PLVAP	Gene Set I
PLXND1	Gene Set I
PMM2	Gene Set I
PNCK	Gene Set I
PNLIPRP2	Gene Set I
PNMA2	Gene Set I
PNMT	Gene Set I
PNP	Gene Set I
PNPLA3	Gene Set I
POLI	Gene Set I
POLR3D	Gene Set I
POU2AF1	Gene Set I
POU2F1	Gene Set I
PPARA	Gene Set I
PPARG	Gene Set I
PPFIA4	Gene Set I
PPIL3	Gene Set I
PPP1CB	Gene Set I
PPP1R14A	Gene Set I
PPP1R14D	Gene Set I
PPP1R15A	Gene Set I
PPP1R1B	Gene Set I
PPP1R3B	Gene Set I
PPP1R3G	Gene Set I
PPP2R2A	Gene Set I
PPP2R5C	Gene Set I
PRAP1	Gene Set I
PRCD	Gene Set I
PRDM16	Gene Set I
PRDX5	Gene Set I
PRDX6	Gene Set I
PRELID2	Gene Set I
PREP	Gene Set I
PRKAB2	Gene Set I
PRKCA	Gene Set I
PRKCG	Gene Set I
PRKCI	Gene Set I
PRL	Gene Set I
PRLR	Gene Set I
PROCR	Gene Set I
PRODH	Gene Set I
PROM2	Gene Set I
PROSER2	Gene Set I
PRPSAP2	Gene Set I
PRR13	Gene Set I
PRRC1	Gene Set I
PRSS16	Gene Set I
PRSS8	Gene Set I
PRTG	Gene Set I
PSMD10P2	Gene Set I
PSTPIP2	Gene Set I
PTAFR	Gene Set I
PTBP3	Gene Set I
PTEN	Gene Set I
PTGER3	Gene Set I
PTGES3L	Gene Set I
PTGES3L-AARSD1	Gene Set I
PTGR2	Gene Set I
PTGS2	Gene Set I
PTH1R	Gene Set I
PTK2	Gene Set I
PTMA	Gene Set I
PTP4A3	Gene Set I
PTPDC1	Gene Set I
PTPN12	Gene Set I
PTPRB	Gene Set I
PTPRF	Gene Set I
PTPRH	Gene Set I
PTPRK	Gene Set I
PTPRR	Gene Set I
PTTG1IP	Gene Set I
PVR	Gene Set I
PWWP2A	Gene Set I
PXN	Gene Set I
PYGL	Gene Set I
PYROXD2	Gene Set I
QPRT	Gene Set I
QSOX1	Gene Set I
RAB11A	Gene Set I
RAB11FIP1	Gene Set I
RAB1A	Gene Set I
RAB20	Gene Set I
RAB27B	Gene Set I
RAB37	Gene Set I
RAB5A	Gene Set I
RAB5B	Gene Set I
RAB6A	Gene Set I
RAB6B	Gene Set I
RAB6C	Gene Set I
RAB8B	Gene Set I
RAB9A	Gene Set I
RAC1	Gene Set I
RAD23B	Gene Set I
RALGDS	Gene Set I
RALGPS2	Gene Set I
RAMP2	Gene Set I
RAPH1	Gene Set I
RARRES1	Gene Set I
RARS2	Gene Set I
RASA4	Gene Set I
RASA4B	Gene Set I
RASA4CP	Gene Set I
RASD2	Gene Set I
RASGEF1A	Gene Set I
RASGEF1B	Gene Set I
RASGRP1	Gene Set I
RASSF6	Gene Set I
RASSF9	Gene Set I
RBM44	Gene Set I
RBMS1	Gene Set I
RBMS2	Gene Set I
RBPJ	Gene Set I
RBPMS	Gene Set I
RCAN1	Gene Set I
RCHY1	Gene Set I
RCOR2	Gene Set I
REEP6	Gene Set I
REL	Gene Set I
RELB	Gene Set I
REM2	Gene Set I
RFTN1	Gene Set I
RFX3	Gene Set I
RFX7	Gene Set I
RGCC	Gene Set I
RGL3	Gene Set I
RGS1	Gene Set I
RGS11	Gene Set I
RGS3	Gene Set I
RHCG	Gene Set I
RHOA	Gene Set I
RHOC	Gene Set I
RHOXF1	Gene Set I
RHPN2	Gene Set I
RIMKLA	Gene Set I
RIN2	Gene Set I
RINL	Gene Set I
RIOK3	Gene Set I
RIPK4	Gene Set I
RIT1	Gene Set I
RNASE1	Gene Set I
RND1	Gene Set I
RNF183	Gene Set I
RNF186	Gene Set I
RNF19B	Gene Set I
RNF208	Gene Set I
RNLS	Gene Set I
RP11-1070B7.2	Gene Set I
RP11-1070B7.3	Gene Set I
RP11-147I3.1	Gene Set I
RP11-206L10.2	Gene Set I
RP11-261C10.7	Gene Set I
RP11-274B21.12	Gene Set I
RP11-274B21.3	Gene Set I
RP11-291L22.9	Gene Set I
RP11-308D16.2	Gene Set I
RP11-310H4.6	Gene Set I
RP11-315D16.2	Gene Set I
RP11-34P13.15	Gene Set I
RP11-34P13.16	Gene Set I
RP11-408P14.1	Gene Set I
RP11-43F13.1	Gene Set I
RP11-452G18.2	Gene Set I
RP11-465B22.3	Gene Set I
RP11-49K24.6	Gene Set I
RP11-514P8.7	Gene Set I
RP11-548H18.2	Gene Set I
RP11-61L23.2	Gene Set I
RP11-903H12.5	Gene Set I
RP1-37E16.12	Gene Set I
RP4-669L17.8	Gene Set I
RP4-765C7.2	Gene Set I
RP5-875O13.6	Gene Set I
RP5-875O13.7	Gene Set I
RP9P	Gene Set I
RPH3AL	Gene Set I
RPL10	Gene Set I
RPL14	Gene Set I
RPL22	Gene Set I
RPL35A	Gene Set I
RPL37	Gene Set I
RPS23P8	Gene Set I
RPS24	Gene Set I
RPS27L	Gene Set I
RPS7	Gene Set I
RPS7P10	Gene Set I
RRAS	Gene Set I
RRBP1	Gene Set I
RREB1	Gene Set I
RSL1D1	Gene Set I
RSL24D1	Gene Set I
RTKN	Gene Set I
RUBCNL	Gene Set I
RYR2	Gene Set I
S100A1	Gene Set I
S100A10	Gene Set I
S100A11	Gene Set I
S100A4	Gene Set I
S100G	Gene Set I
S1PR4	Gene Set I
SALL4	Gene Set I
SBNO2	Gene Set I
SC5D	Gene Set I
SCARB1	Gene Set I
SCGB2A1	Gene Set I
SCGN	Gene Set I
SCIN	Gene Set I
SCP2	Gene Set I
SCT	Gene Set I
SCTR	Gene Set I
SDC4	Gene Set I
SDCBP2	Gene Set I
SDHAF4	Gene Set I
SDHAP1	Gene Set I
SDHAP2	Gene Set I
SDHAP3	Gene Set I
SDK1	Gene Set I
SDPR	Gene Set I
SDR16C5	Gene Set I
SEC13	Gene Set I
SEC16B	Gene Set I
SEC22B	Gene Set I
SEC24A	Gene Set I
SEC24D	Gene Set I
SEC31A	Gene Set I
SEC61G	Gene Set I
SELE	Gene Set I
SELENBP1	Gene Set I
SELENOK	Gene Set I
SELENOP	Gene Set I
SEMA3B	Gene Set I
SERINC5	Gene Set I
SERP1	Gene Set I
SERPINA11	Gene Set I
SERPINA12	Gene Set I
SERPINA5	Gene Set I
SERPINA6	Gene Set I
SERPINB1	Gene Set I
SERPINB6	Gene Set I
SERPINB9	Gene Set I
SERPINF2	Gene Set I
SERPINH1	Gene Set I
SEZ6L2	Gene Set I
SH2D7	Gene Set I
SH3BGRL	Gene Set I
SH3D21	Gene Set I
SH3PXD2A	Gene Set I
SH3RF2	Gene Set I
SH3TC1	Gene Set I
SH3TC2	Gene Set I
SH3YL1	Gene Set I
SHC1	Gene Set I
SHC2	Gene Set I
SHROOM3	Gene Set I
SI	Gene Set I
SIGLEC12	Gene Set I
SIGLEC15	Gene Set I
SLA	Gene Set I
SLAMF9	Gene Set I
SLC10A2	Gene Set I
SLC11A2	Gene Set I
SLC12A2	Gene Set I
SLC13A3	Gene Set I
SLC15A1	Gene Set I
SLC15A4	Gene Set I
SLC16A3	Gene Set I
SLC16A5	Gene Set I
SLC17A1	Gene Set I
SLC17A9	Gene Set I
SLC18B1	Gene Set I
SLC19A3	Gene Set I
SLC1A6	Gene Set I
SLC1A7	Gene Set I
SLC22A23	Gene Set I
SLC22A3	Gene Set I
SLC22A9	Gene Set I
SLC24A3	Gene Set I
SLC25A23	Gene Set I
SLC25A37	Gene Set I
SLC25A43	Gene Set I
SLC26A3	Gene Set I
SLC27A6	Gene Set I
SLC28A1	Gene Set I
SLC29A1	Gene Set I
SLC29A4	Gene Set I
SLC2A1	Gene Set I
SLC2A13	Gene Set I
SLC2A14	Gene Set I
SLC2A3	Gene Set I
SLC38A11	Gene Set I
SLC39A1	Gene Set I
SLC39A10	Gene Set I
SLC39A4	Gene Set I
SLC39A5	Gene Set I
SLC3A1	Gene Set I
SLC45A3	Gene Set I
SLC4A3	Gene Set I
SLC51B	Gene Set I
SLC5A12	Gene Set I
SLC5A9	Gene Set I
SLC6A10P	Gene Set I
SLC6A19	Gene Set I
SLC6A8	Gene Set I
SLC7A4	Gene Set I
SLC7A7	Gene Set I
SLC7A8	Gene Set I
SLC7A9	Gene Set I
SLC9A3	Gene Set I
SLCO4A1	Gene Set I
SLITRK6	Gene Set I
SLX1A	Gene Set I
SMAP1	Gene Set I
SMAP2	Gene Set I
SMARCA1	Gene Set I
SMG1P2	Gene Set I
SMIM14	Gene Set I
SMIM22	Gene Set I
SMIM6	Gene Set I
SMLR1	Gene Set I
SMOC2	Gene Set I
SMPD3	Gene Set I
SMPDL3A	Gene Set I
SMS	Gene Set I
SMTN	Gene Set I
SMURF1	Gene Set I
SNCG	Gene Set I
SNTB1	Gene Set I
SNX10	Gene Set I
SNX25	Gene Set I
SNX3	Gene Set I
SOCS3	Gene Set I
SOD2	Gene Set I
SORBS2	Gene Set I
SORBS3	Gene Set I
SORD	Gene Set I
SORD2P	Gene Set I
SOWAHD	Gene Set I
SOX6	Gene Set I
SOX9	Gene Set I
SP1	Gene Set I
SP100	Gene Set I
SP3P	Gene Set I
SPAG17	Gene Set I
SPAG4	Gene Set I
SPATA18	Gene Set I
SPATS2L	Gene Set I
SPDEF	Gene Set I
SPDYE6	Gene Set I
SPEG	Gene Set I
SPHK2	Gene Set I
SPIB	Gene Set I
SPICE1	Gene Set I
SPINK13	Gene Set I
SPINK5	Gene Set I
SPIRE2	Gene Set I
SPOCD1	Gene Set I
SPOCK2	Gene Set I
SPON2	Gene Set I
SQLE	Gene Set I
SQRDL	Gene Set I
SREBF2	Gene Set I
SRI	Gene Set I
SSC4D	Gene Set I
SSH2	Gene Set I
SSR3	Gene Set I
SSTR3	Gene Set I
ST5	Gene Set I
ST8SIA6	Gene Set I
STARD10	Gene Set I
STARD13	Gene Set I
STARD4	Gene Set I
STAT6	Gene Set I
STAU1	Gene Set I
STBD1	Gene Set I
STC1	Gene Set I
STEAP2	Gene Set I
STOM	Gene Set I
STPG1	Gene Set I
STT3A	Gene Set I
STX7	Gene Set I
STYK1	Gene Set I
SUCLG2	Gene Set I
SUGT1	Gene Set I
SULT1A4	Gene Set I
SULT1B1	Gene Set I
SULT1C2	Gene Set I
SULT1E1	Gene Set I
SULT2B1	Gene Set I
SUPT3H	Gene Set I
SUSD2	Gene Set I
SUSD3	Gene Set I
SVEP1	Gene Set I
SYCP2	Gene Set I
SYNE1	Gene Set I
SYNPR	Gene Set I
SYT7	Gene Set I
SYT8	Gene Set I
TAB3	Gene Set I
TAGLN	Gene Set I
TARSL2	Gene Set I
TBC1D3L	Gene Set I
TBC1D8B	Gene Set I
TBX19	Gene Set I
TBX6	Gene Set I
TC2N	Gene Set I
TCAIM	Gene Set I
TCEA3	Gene Set I
TCEAL8	Gene Set I
TCEAL9	Gene Set I
TCF21	Gene Set I
TCF7L2	Gene Set I
TCN2	Gene Set I
TDO2	Gene Set I
TDP2	Gene Set I
TDRP	Gene Set I
TEP1	Gene Set I
TES	Gene Set I
TESMIN	Gene Set I
TET1	Gene Set I
TFEC	Gene Set I
TFG	Gene Set I
TFPI	Gene Set I
TFR2	Gene Set I
TGDS	Gene Set I
TGIF1	Gene Set I
THPO	Gene Set I
THRA	Gene Set I
THUMPD2	Gene Set I
TICAM1	Gene Set I
TIMD4	Gene Set I
TINAG	Gene Set I
TLCD2	Gene Set I
TLE2	Gene Set I
TLE6	Gene Set I
TM4SF1	Gene Set I
TM4SF18	Gene Set I
TM4SF20	Gene Set I
TM4SF4	Gene Set I
TM4SF5	Gene Set I
TM6SF2	Gene Set I
TMBIM1	Gene Set I
TMC6	Gene Set I
TMCC1	Gene Set I
TMCC3	Gene Set I
TMCO4	Gene Set I
TMED10	Gene Set I
TMED4	Gene Set I
TMEM106A	Gene Set I
TMEM120A	Gene Set I
TMEM123	Gene Set I
TMEM133	Gene Set I
TMEM141	Gene Set I
TMEM156	Gene Set I
TMEM176A	Gene Set I
TMEM176B	Gene Set I
TMEM198B	Gene Set I
TMEM204	Gene Set I
TMEM263	Gene Set I
TMEM265	Gene Set I
TMEM31	Gene Set I
TMEM37	Gene Set I
TMEM45A	Gene Set I
TMEM52	Gene Set I
TMEM61	Gene Set I
TMEM74B	Gene Set I
TMEM82	Gene Set I
TMEM91	Gene Set I
TMEM92	Gene Set I
TMEM94	Gene Set I
TMF1	Gene Set I
TMLHE	Gene Set I
TMOD3	Gene Set I
TMPRSS13	Gene Set I
TMPRSS3	Gene Set I
TMPRSS4	Gene Set I
TMPRSS5	Gene Set I
TMPRSS6	Gene Set I
TMSB4X	Gene Set I
TMSB4XP4	Gene Set I
TNFAIP2	Gene Set I
TNFAIP3	Gene Set I
TNFRSF11B	Gene Set I
TNFRSF14	Gene Set I
TNFRSF19	Gene Set I
TNFRSF1B	Gene Set I
TNFRSF25	Gene Set I
TNFSF13	Gene Set I
TNFSF18	Gene Set I
TNIP1	Gene Set I
TNNC1	Gene Set I
TNNT1	Gene Set I
TOMM20	Gene Set I
TOX3	Gene Set I
TPD52	Gene Set I
TPH2	Gene Set I
TPK1	Gene Set I
TPM1	Gene Set I
TPM2	Gene Set I
TRAK1	Gene Set I
TRAM1	Gene Set I
TRANK1	Gene Set I
TRIB1	Gene Set I
TRIM16	Gene Set I
TRIM31	Gene Set I
TRIM5	Gene Set I
TRIM71	Gene Set I
TRIOBP	Gene Set I
TRIP10	Gene Set I
TRIP6	Gene Set I
TRIQK	Gene Set I
TRNAU1AP	Gene Set I
TRNP1	Gene Set I
TRPC6	Gene Set I
TRPM4	Gene Set I
TRPV2	Gene Set I
TRPV3	Gene Set I
TSC22D2	Gene Set I
TSEN34	Gene Set I
TSNARE1	Gene Set I
TSPAN1	Gene Set I
TSPAN13	Gene Set I
TSPAN2	Gene Set I
TSPAN31	Gene Set I
TSPAN8	Gene Set I
TSPO2	Gene Set I
TSTD1	Gene Set I
TTC39A	Gene Set I
TTC39B	Gene Set I
TTLL2	Gene Set I
TTLL6	Gene Set I
TVP23B	Gene Set I
TYMP	Gene Set I
TYRO3	Gene Set I
UAP1	Gene Set I
UBE2E1	Gene Set I
UBE2H	Gene Set I
UBE2N	Gene Set I
UCP2	Gene Set I
UFC1	Gene Set I
UFL1	Gene Set I
UFM1	Gene Set I
UGCG	Gene Set I
UGP2	Gene Set I
UGT2B17	Gene Set I
UNC13C	Gene Set I
UNC13D	Gene Set I
UNC5CL	Gene Set I
UNC93A	Gene Set I
UNC93B1	Gene Set I
UPK1A	Gene Set I
UQCRC2	Gene Set I
UQCRH	Gene Set I
URAHP	Gene Set I
USH1G	Gene Set I
USP12	Gene Set I
USP32P1	Gene Set I
USP53	Gene Set I
USPL1	Gene Set I
VAPA	Gene Set I
VASP	Gene Set I
VCL	Gene Set I
VDAC1	Gene Set I
VDAC2	Gene Set I
VEGFA	Gene Set I
VIL1	Gene Set I
VIPR1	Gene Set I
VN1R48P	Gene Set I
VNN1	Gene Set I
VPS37B	Gene Set I
VTN	Gene Set I
VWA5A	Gene Set I
VWA7	Gene Set I
WASF2	Gene Set I
WASH3P	Gene Set I
WBP2	Gene Set I
WBSCR27	Gene Set I
WDFY1	Gene Set I
WDR45B	Gene Set I
WDR54	Gene Set I
WDR66	Gene Set I
WFDC1	Gene Set I
WISP1	Gene Set I
WISP3	Gene Set I
WNK4	Gene Set I
WNT2	Gene Set I
WNT5A	Gene Set I
WSB2	Gene Set I
XBP1	Gene Set I
XDH	Gene Set I
XPNPEP1	Gene Set I
XPNPEP2	Gene Set I
XXbac-B444P24.10	Gene Set I
YEATS2	Gene Set I
YWHABP2	Gene Set I
YWHAH	Gene Set I
YWHAZ	Gene Set I
ZBTB25	Gene Set I
ZDHHC2	Gene Set I
ZDHHC9	Gene Set I
ZFP28	Gene Set I
ZFP36	Gene Set I
ZFP36L1	Gene Set I
ZMYM5	Gene Set I
ZMYND8	Gene Set I
ZNF124	Gene Set I
ZNF143	Gene Set I
ZNF160	Gene Set I
ZNF219	Gene Set I
ZNF226	Gene Set I
ZNF267	Gene Set I
ZNF321P	Gene Set I
ZNF33B	Gene Set I
ZNF385A	Gene Set I
ZNF385C	Gene Set I
ZNF395	Gene Set I
ZNF415	Gene Set I
ZNF431	Gene Set I
ZNF438	Gene Set I
ZNF444	Gene Set I
ZNF462	Gene Set I
ZNF467	Gene Set I
ZNF488	Gene Set I
ZNF511-PRAP1	Gene Set I
ZNF525	Gene Set I
ZNF550	Gene Set I
ZNF552	Gene Set I
ZNF563	Gene Set I
ZNF586	Gene Set I
ZNF600	Gene Set I
ZNF608	Gene Set I
ZNF630	Gene Set I
ZNF654	Gene Set I
ZNF69	Gene Set I
ZNF717	Gene Set I
ZNF721	Gene Set I
ZNF766	Gene Set I
ZNF780A	Gene Set I
ZNF787	Gene Set I
ZNF804A	Gene Set I
ZNF808	Gene Set I
ZNF827	Gene Set I
ZNF846	Gene Set I
ZSWIM4	Gene Set I
AAED1	Gene Set II
AATK	Gene Set II
ABCA5	Gene Set II
ABCA6	Gene Set II
ABCB6	Gene Set II
ABLIM1	Gene Set II
AC007325.2	Gene Set II
AC090774.2	Gene Set II
AC127070.1	Gene Set II
ACAT2	Gene Set II
ACBD3	Gene Set II
ACKR3	Gene Set II
ACLY	Gene Set II
ACO1	Gene Set II
ACOT1	Gene Set II
ACPP	Gene Set II
ACTA2	Gene Set II
ACTB	Gene Set II
ACTG1	Gene Set II
ACTG2	Gene Set II
ACTN1	Gene Set II
ACTN3	Gene Set II
ACTR3	Gene Set II
ACTRT3	Gene Set II
ACVRL1	Gene Set II
ADAM33	Gene Set II
ADAMTS1	Gene Set II
ADAMTS2	Gene Set II
ADAMTS20	Gene Set II
ADAMTS5	Gene Set II
ADAMTS8	Gene Set II
ADAMTSL2	Gene Set II
ADGRB3	Gene Set II
ADGRF5	Gene Set II
ADGRG7	Gene Set II
ADH1B	Gene Set II
ADH5	Gene Set II
ADM	Gene Set II
ADPRH	Gene Set II
AEBP1	Gene Set II
AES	Gene Set II
AFAP1L1	Gene Set II
AFMID	Gene Set II
AGAP12P	Gene Set II
AGR2	Gene Set II
AGT	Gene Set II
AGTPBP1	Gene Set II
AIMP1	Gene Set II
AK1	Gene Set II
AK2	Gene Set II
AKAP12	Gene Set II
AKAP17A	Gene Set II
AKAP2	Gene Set II
AKAP8	Gene Set II
AKIRIN2	Gene Set II
AKR1A1	Gene Set II
ALDOA	Gene Set II
ALDOC	Gene Set II
ALKBH7	Gene Set II
[truncated: 5,219 more rows]
