# Supplementary material for: Bacterial colonization stimulates a complex physiological response in the immature human intestinal epithelium
Source: eLife. 2017 Nov 7;6:e29132. doi: 10.7554/eLife.29132 (PMC5711377; doi:10.7554/eLife.29132)
Supplement: Supplementary file 2 — NDS, Normal donkey serum; PBS, phosphate buffered saline. [file elife-29132-supp2.xls]

## Sheet: Sheet1
Primary target	Species	Dilution	Blocking buffer	Product number
E-cadherein	goat	1:1000	5% NDS	R&D Systems AF748
GFP	chicken	1:1000	5% NDS	Abcam ab13970
PMDZ-thiol	mouse	1:500	5% NDS	Hypoxyprobe HP1-1000
Mucin 5AC	rabbit	1:250	CarboFree	Abcam ab79082
Mucin 2	rabbit	1:50	CarboFree	Santa Cruz sc-15334
ZO-1	rabbit	1:400	5% NDS	Cell Signaling 13663
Occludin	rabbit	1:250	5% NDS	Invitrogen 71-1500
acetylated Tubulin	mouse	1:500	5% NDS	Sigma Aldrich T7451-200UL
Fucα-2Gal-R (UEA1)	biotinylated	1:1000	CarboFree	Vector labs B-1065
KI67	rabbit	1:400	5% NDS	Thermo Scientific RM-9106-S1
DPPIV	goat	1:500	5% NDS	R&D Systems AF954
SOX9	rabbit	1:500	5% NDS	Millipore AB5535
LYZ	rabbit	1:1000	5% NDS	Santa Cruz sc-292849
Click-iT™ EdU Alexa Fluor™ 594 Imaging Kit	NA	NA	5% NDS	Thermo Fisher C10339
Secondary antibodies
anti-goat Cy3	donkey	1:500	PBS	Jackson Immuno 705-165-147
anti-goat 488	donkey	1:500	PBS	Jackson Immuno 705-545-147
anti-mouse 568	donkey	1:1000	PBS	Life Technologies A10037
anti-rabbit 488	donkey	1:1000	PBS	Life Technologies A21206
Streptavidin 488	NA	1:1000	PBS	Jackson Immuno 016-540-084
anti-rabbit Cy3	donkey	1:500	PBS	Jackson Immuno 711-165-102
