# Supplementary figures and images for: Bacterial colonization stimulates a complex physiological response in the immature human intestinal epithelium
Source: eLife journal article supplement (doi:10.7554/elife.29132), 2017-11-06

**A**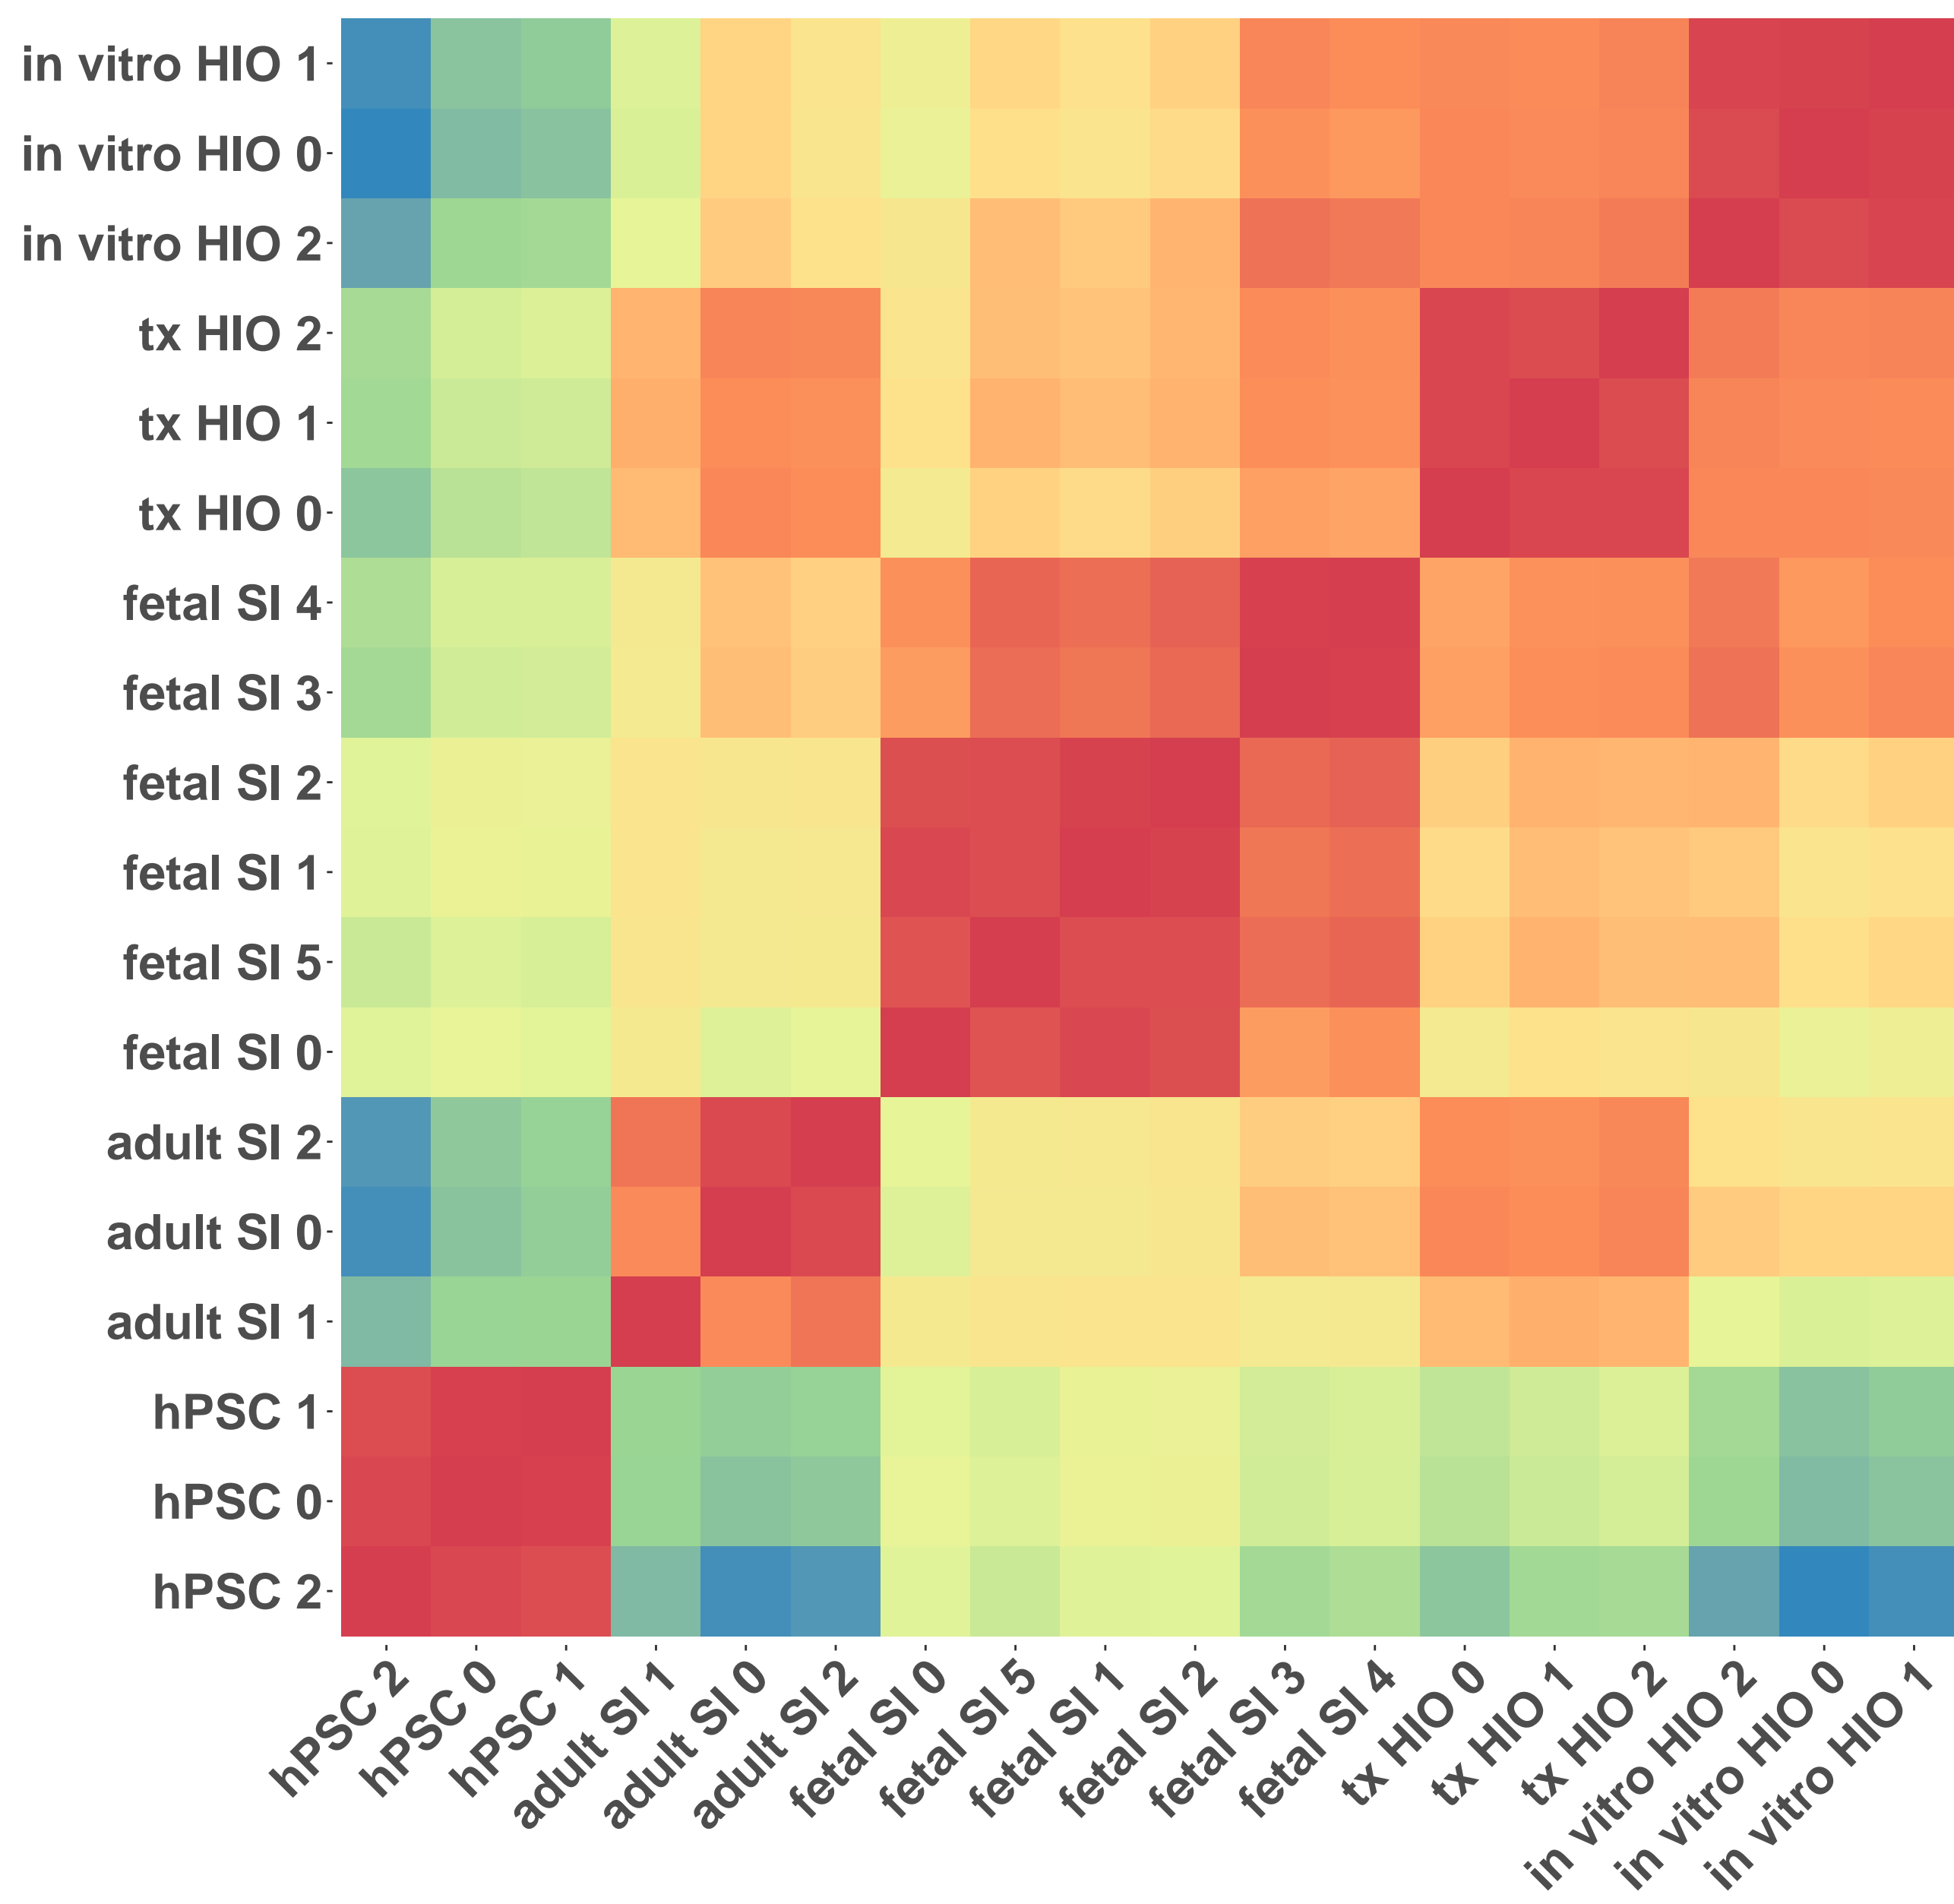**B**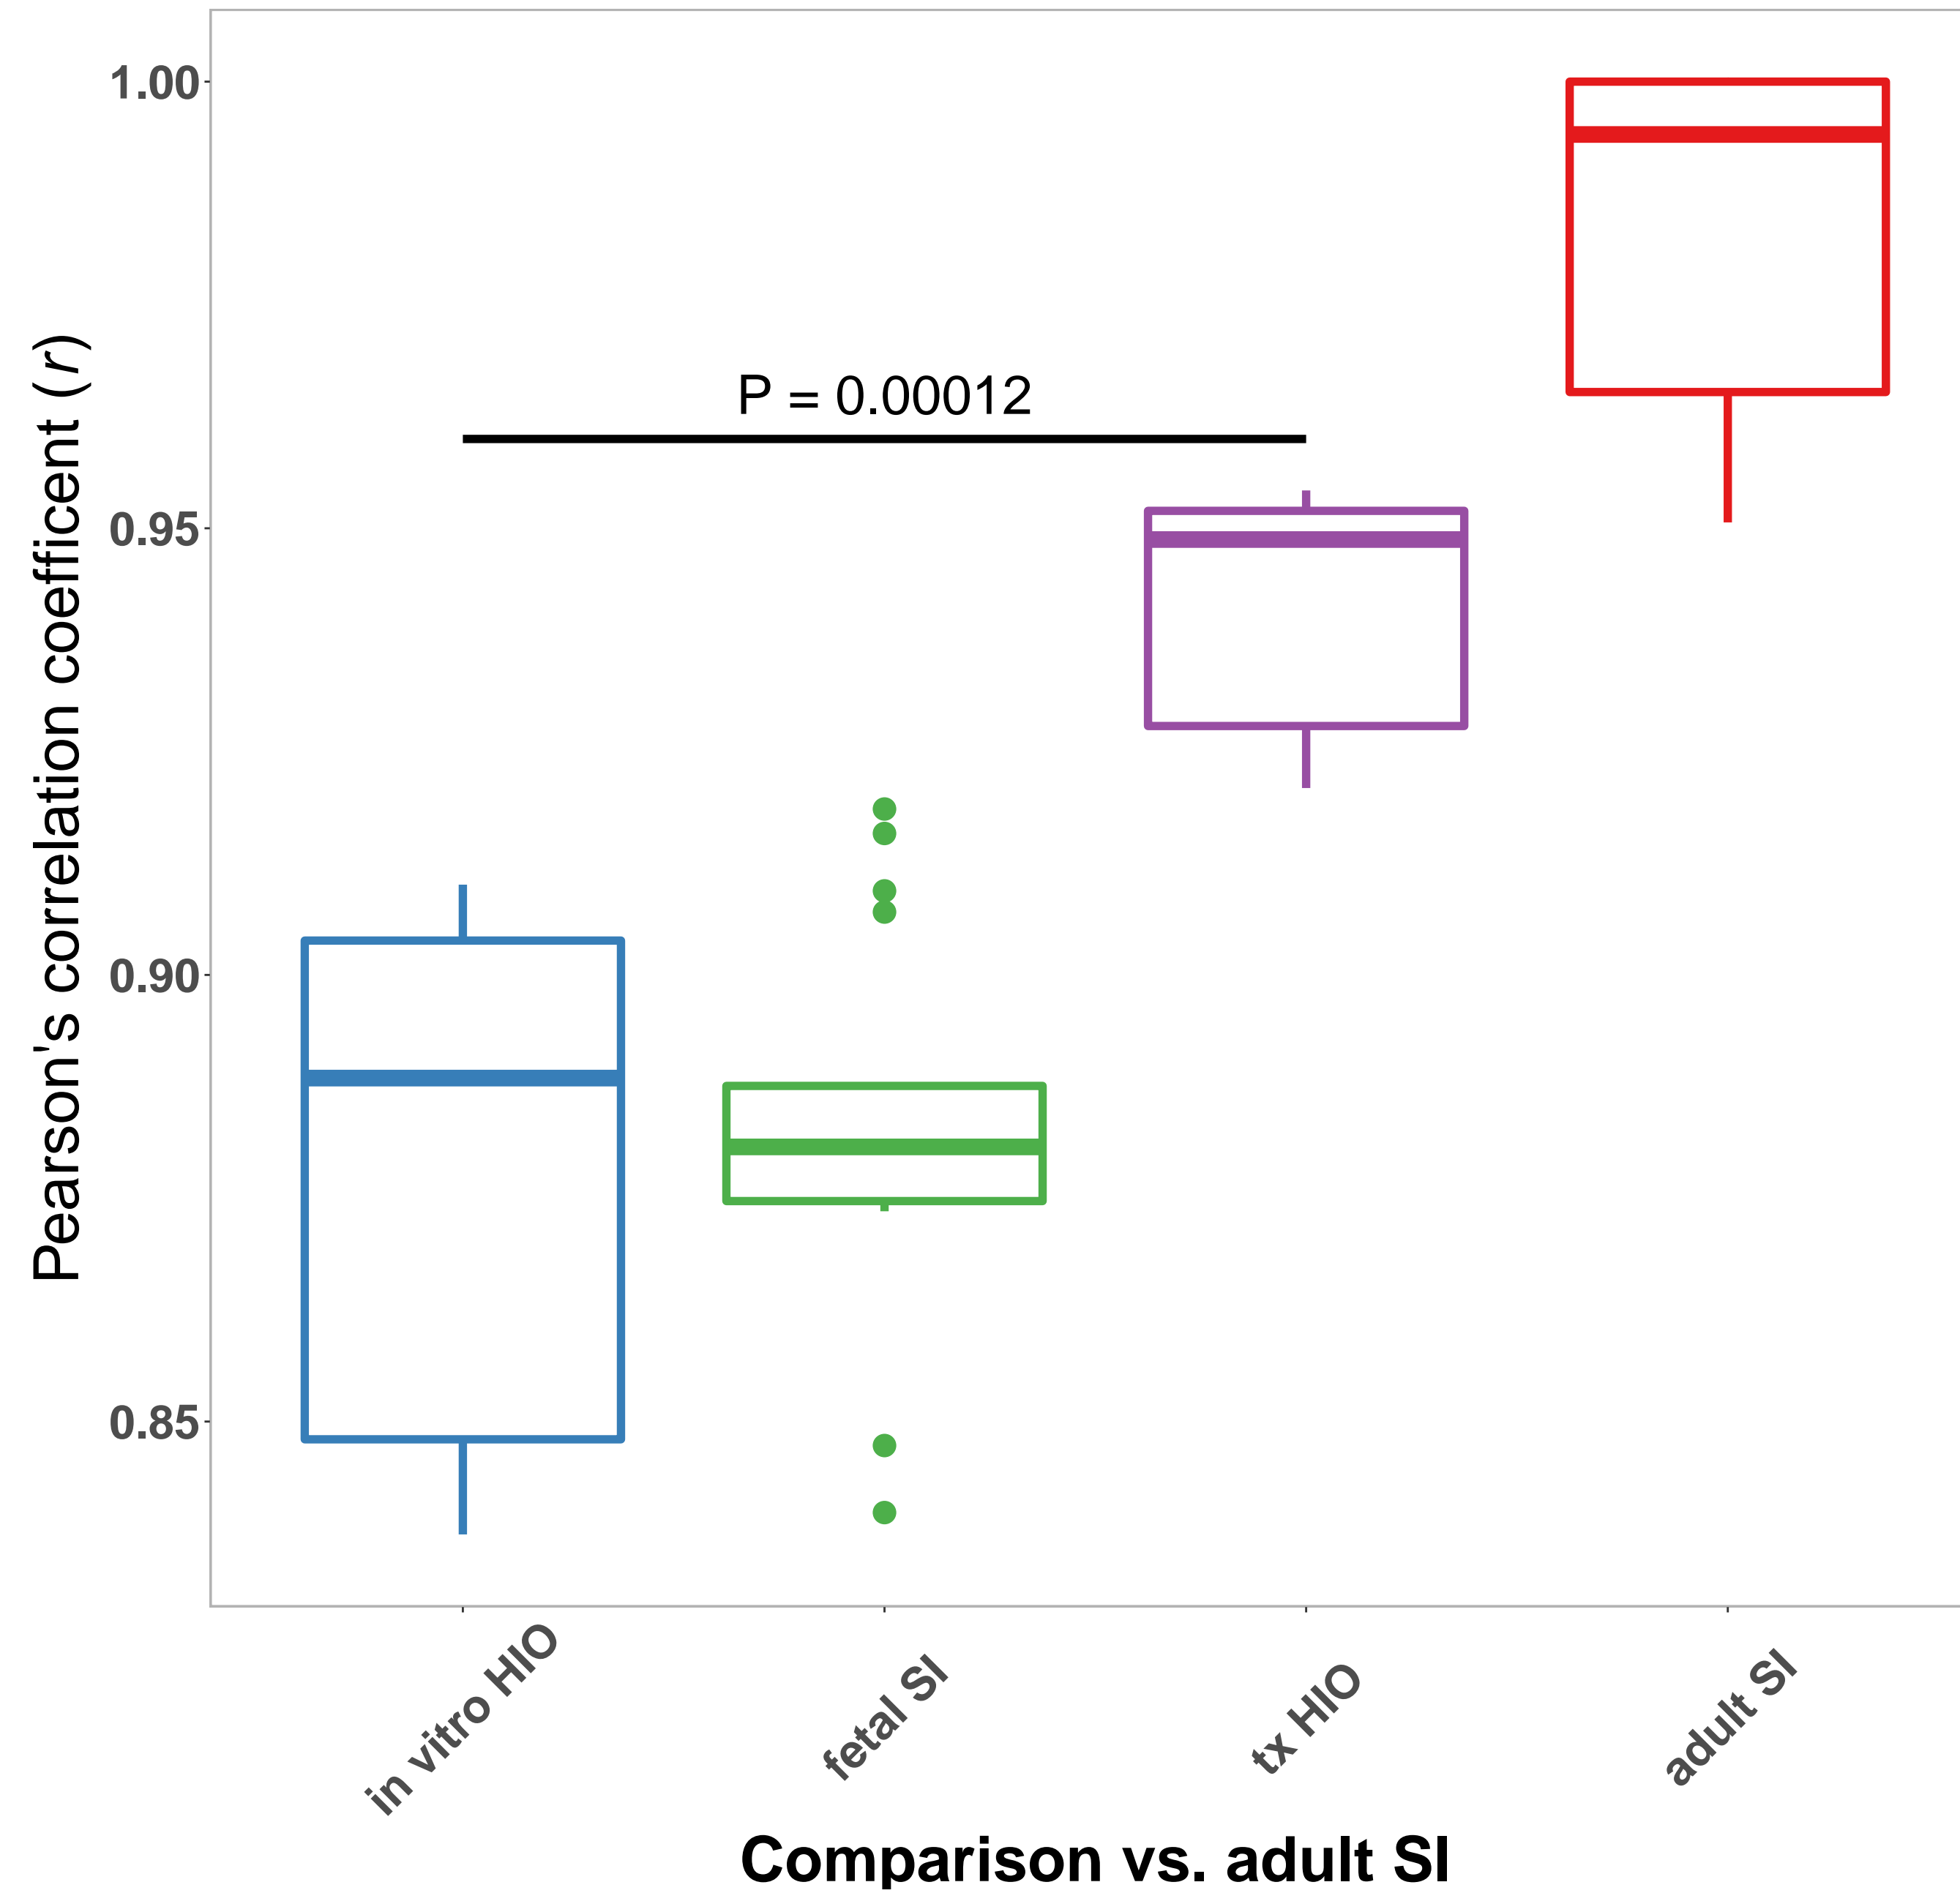**D**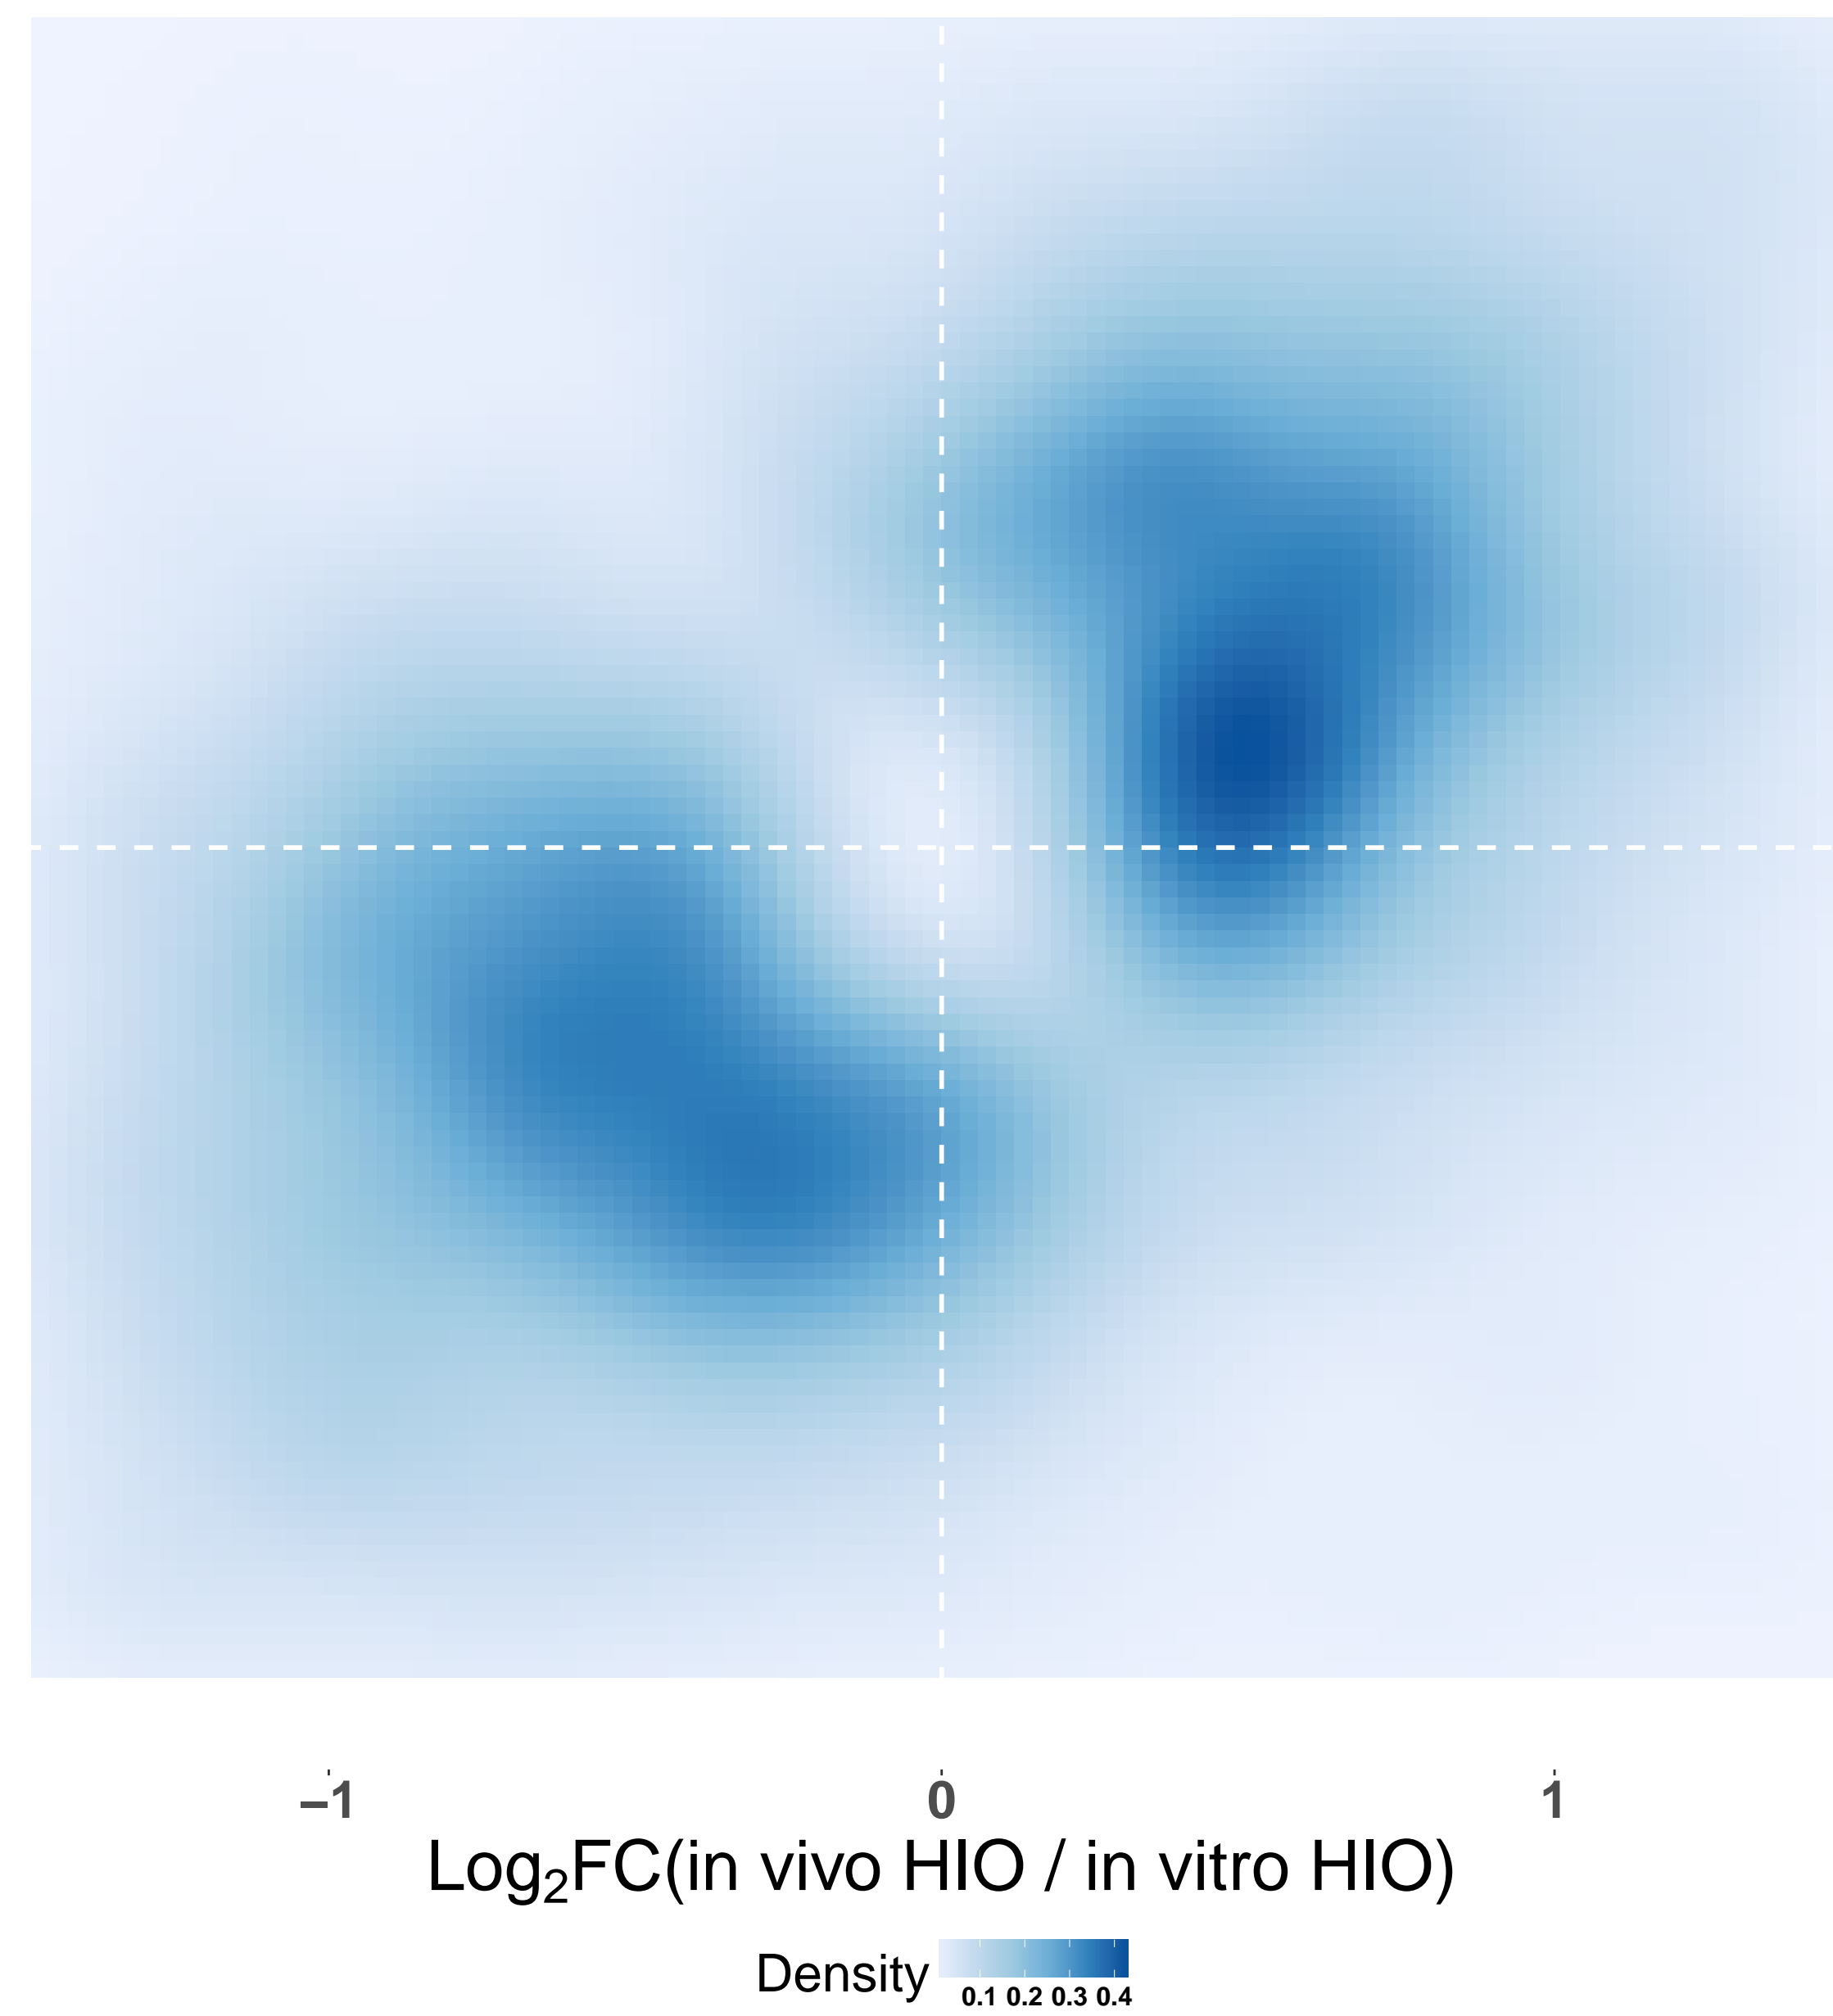**C**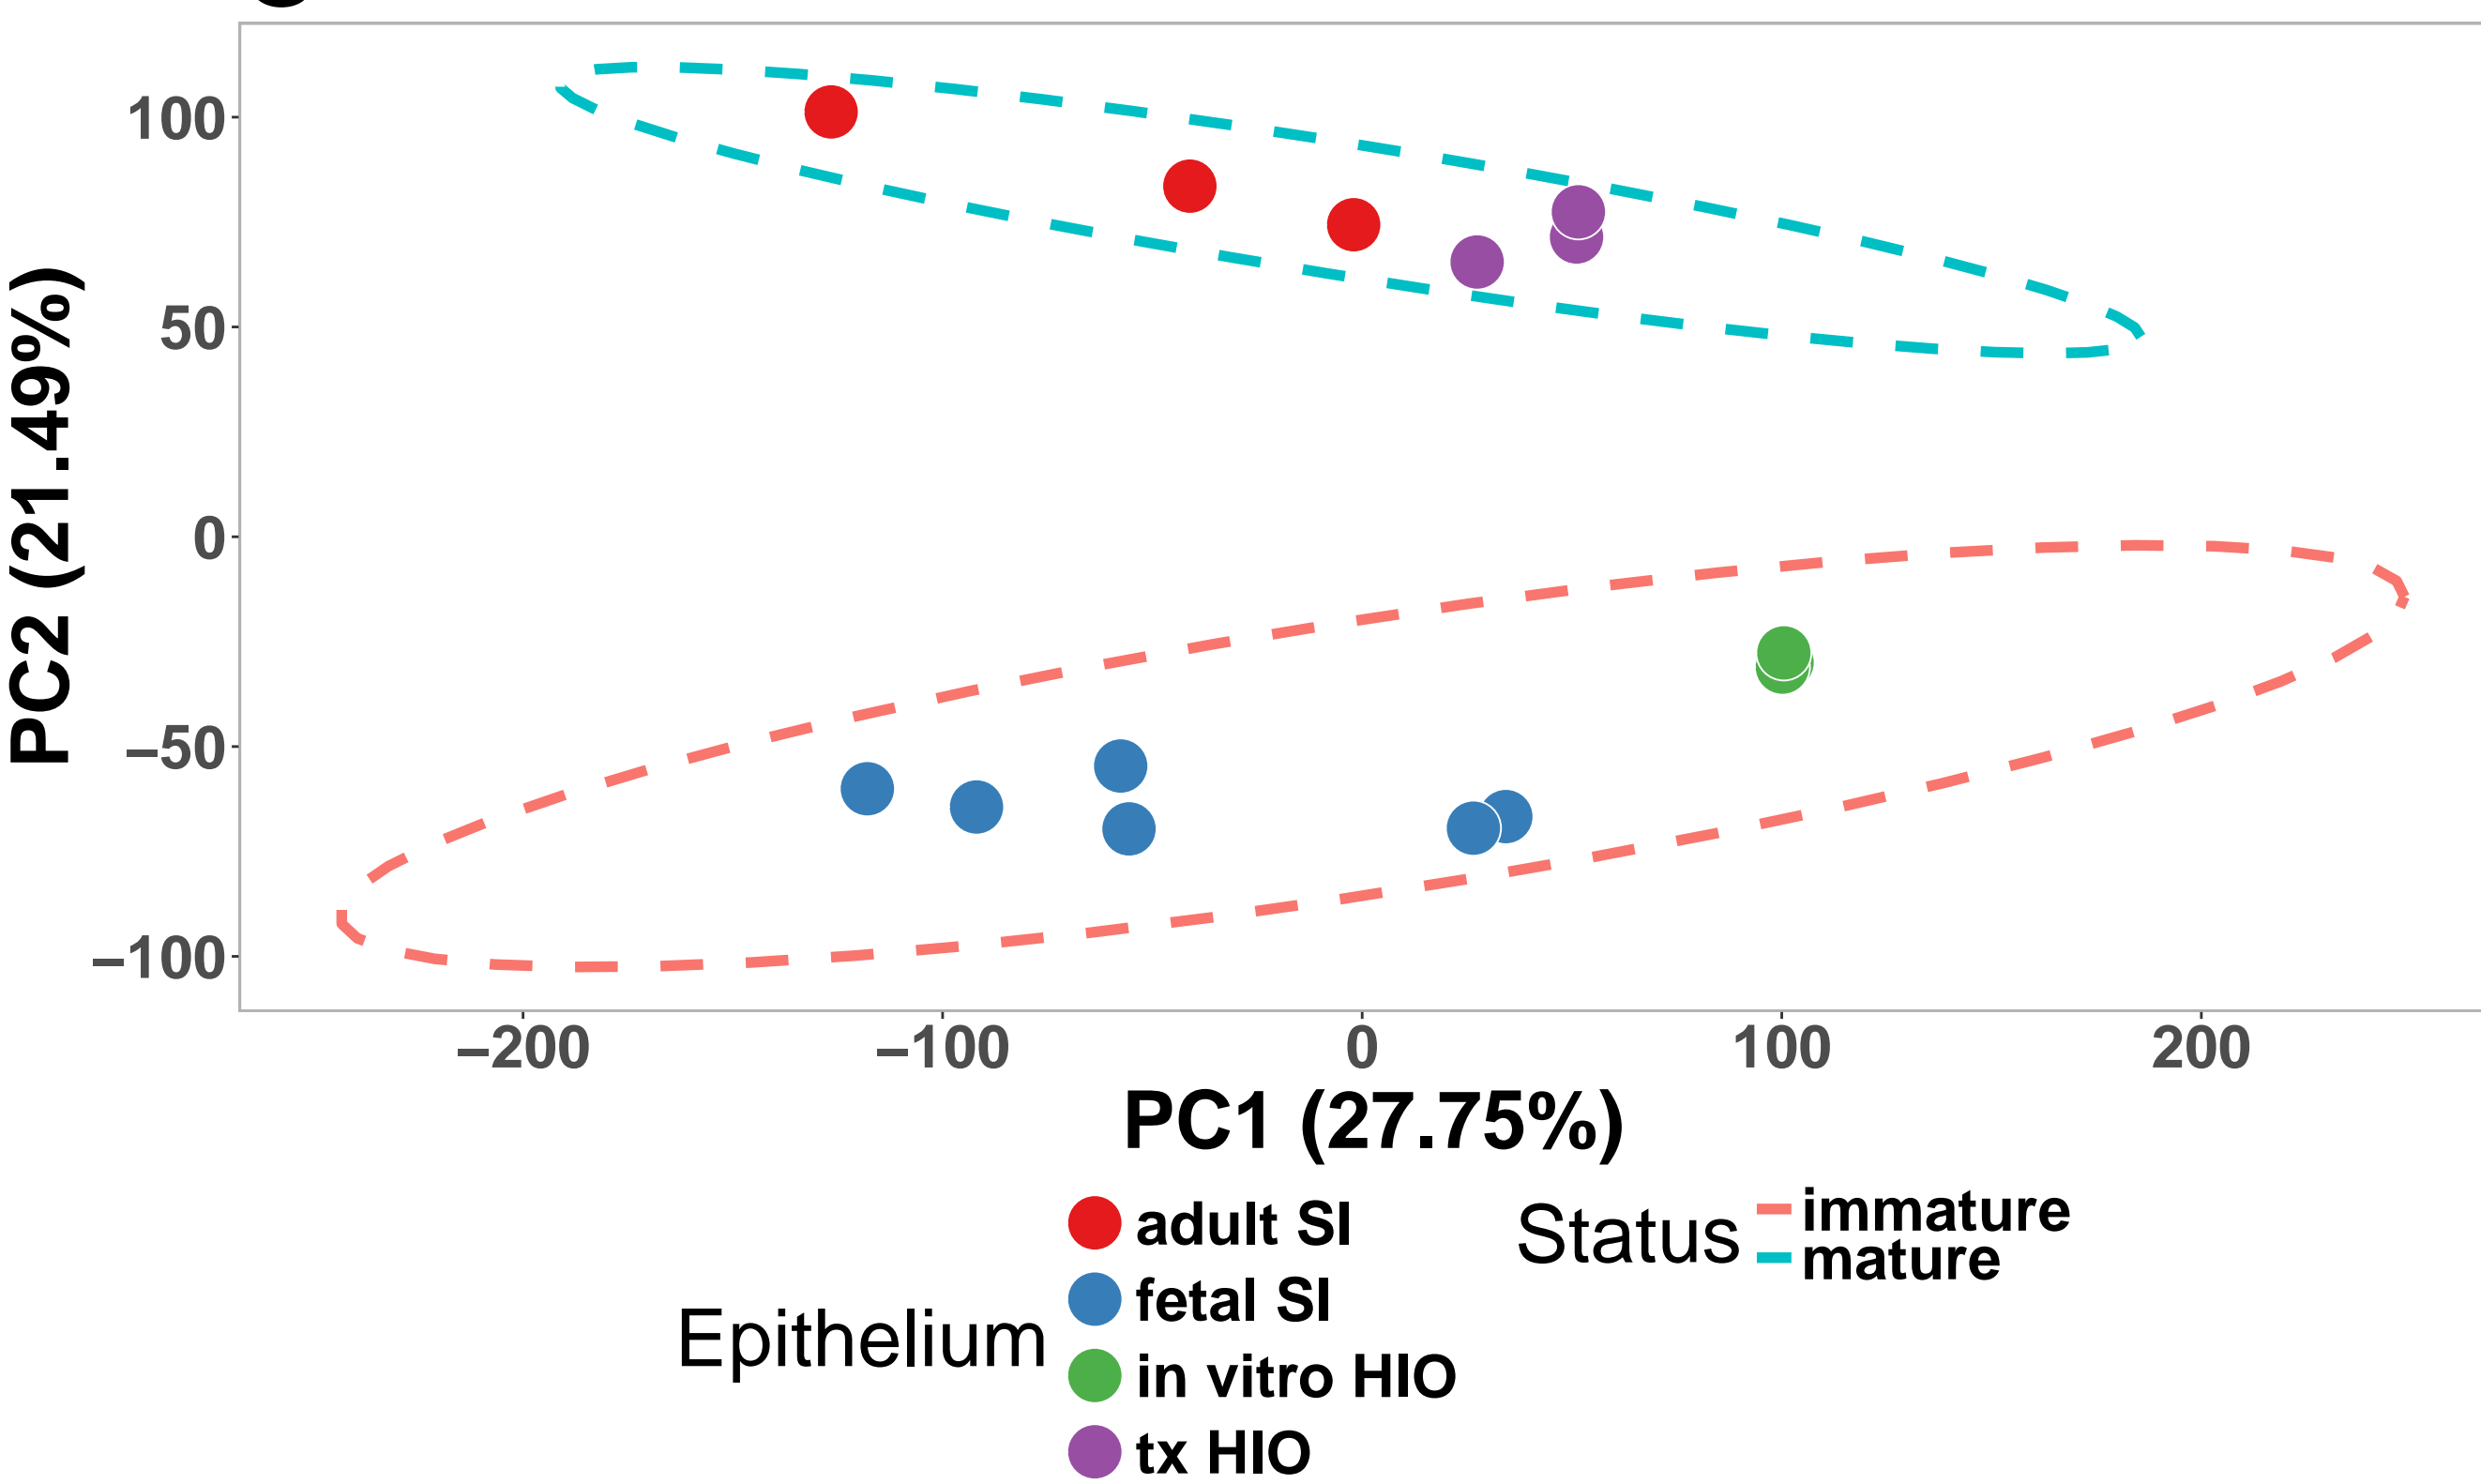

Supplement: supp [file elife_poa_e29132_Figure_1_figure_supplement_1.pdf › elife_poa_e29132_Figure_1_figure_supplement_1.pdf]

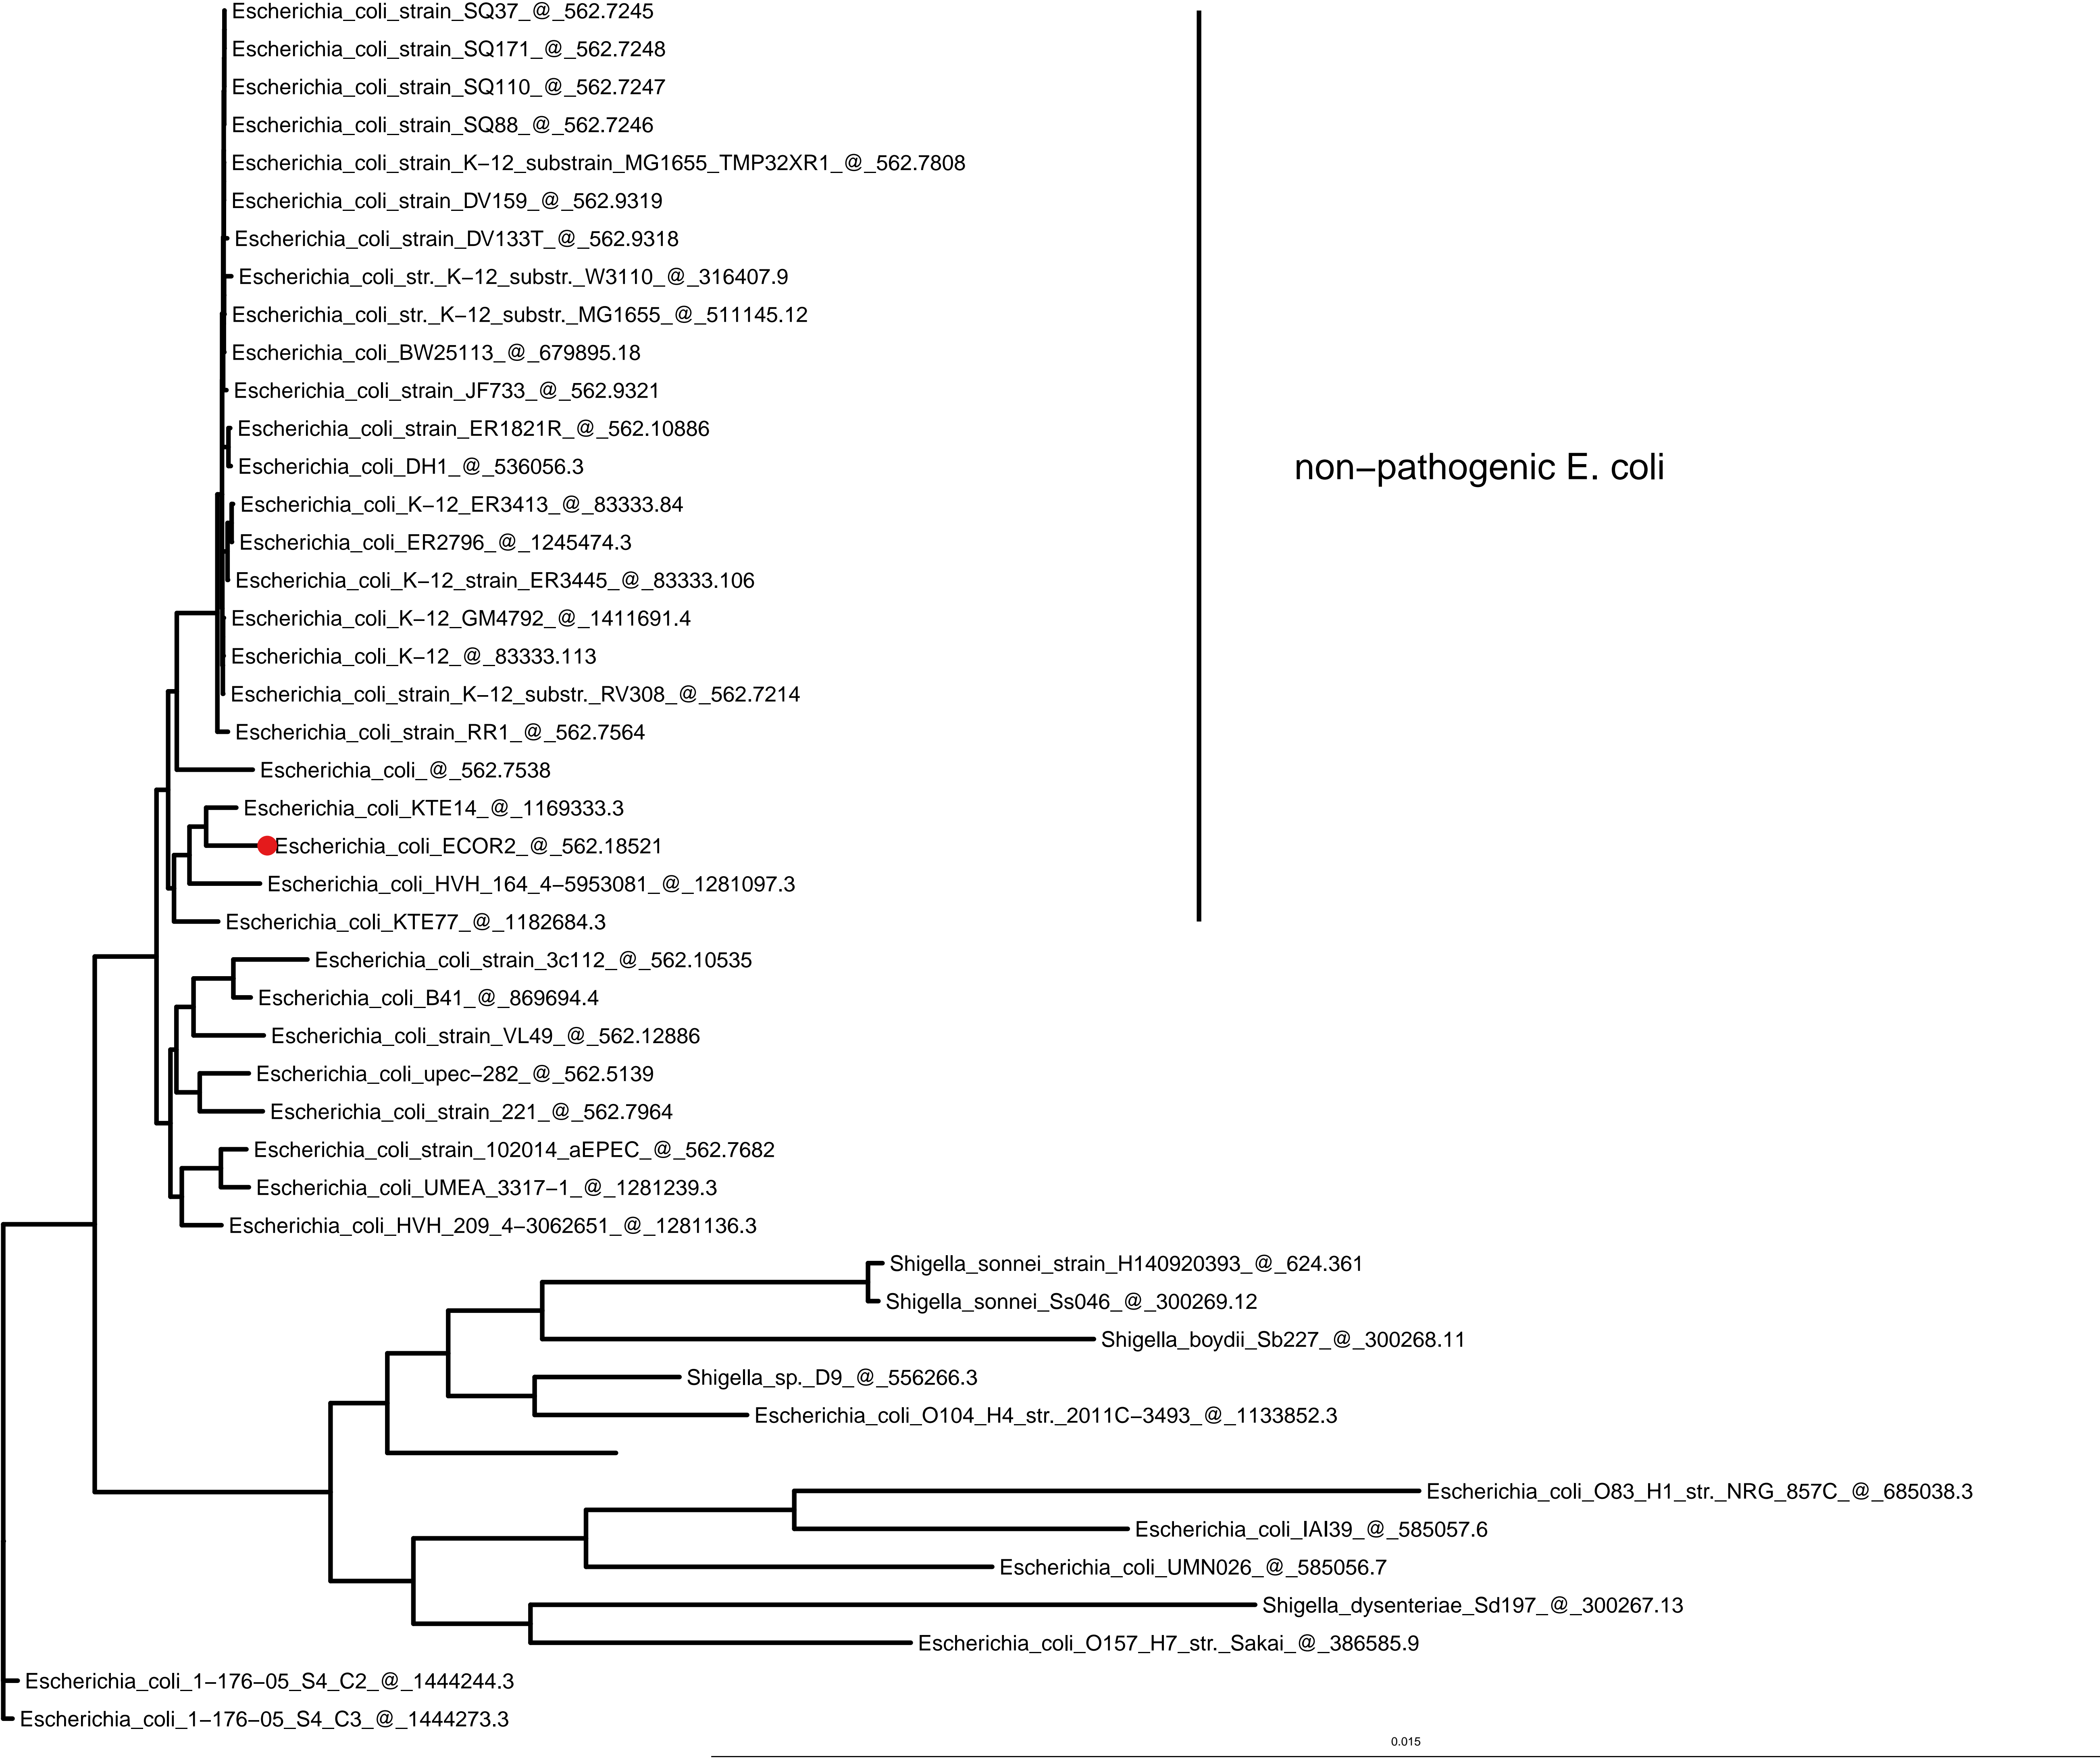

Supplement: supp [file elife_poa_e29132_Figure_1_figure_supplement_2.pdf › elife_poa_e29132_Figure_1_figure_supplement_2.pdf]

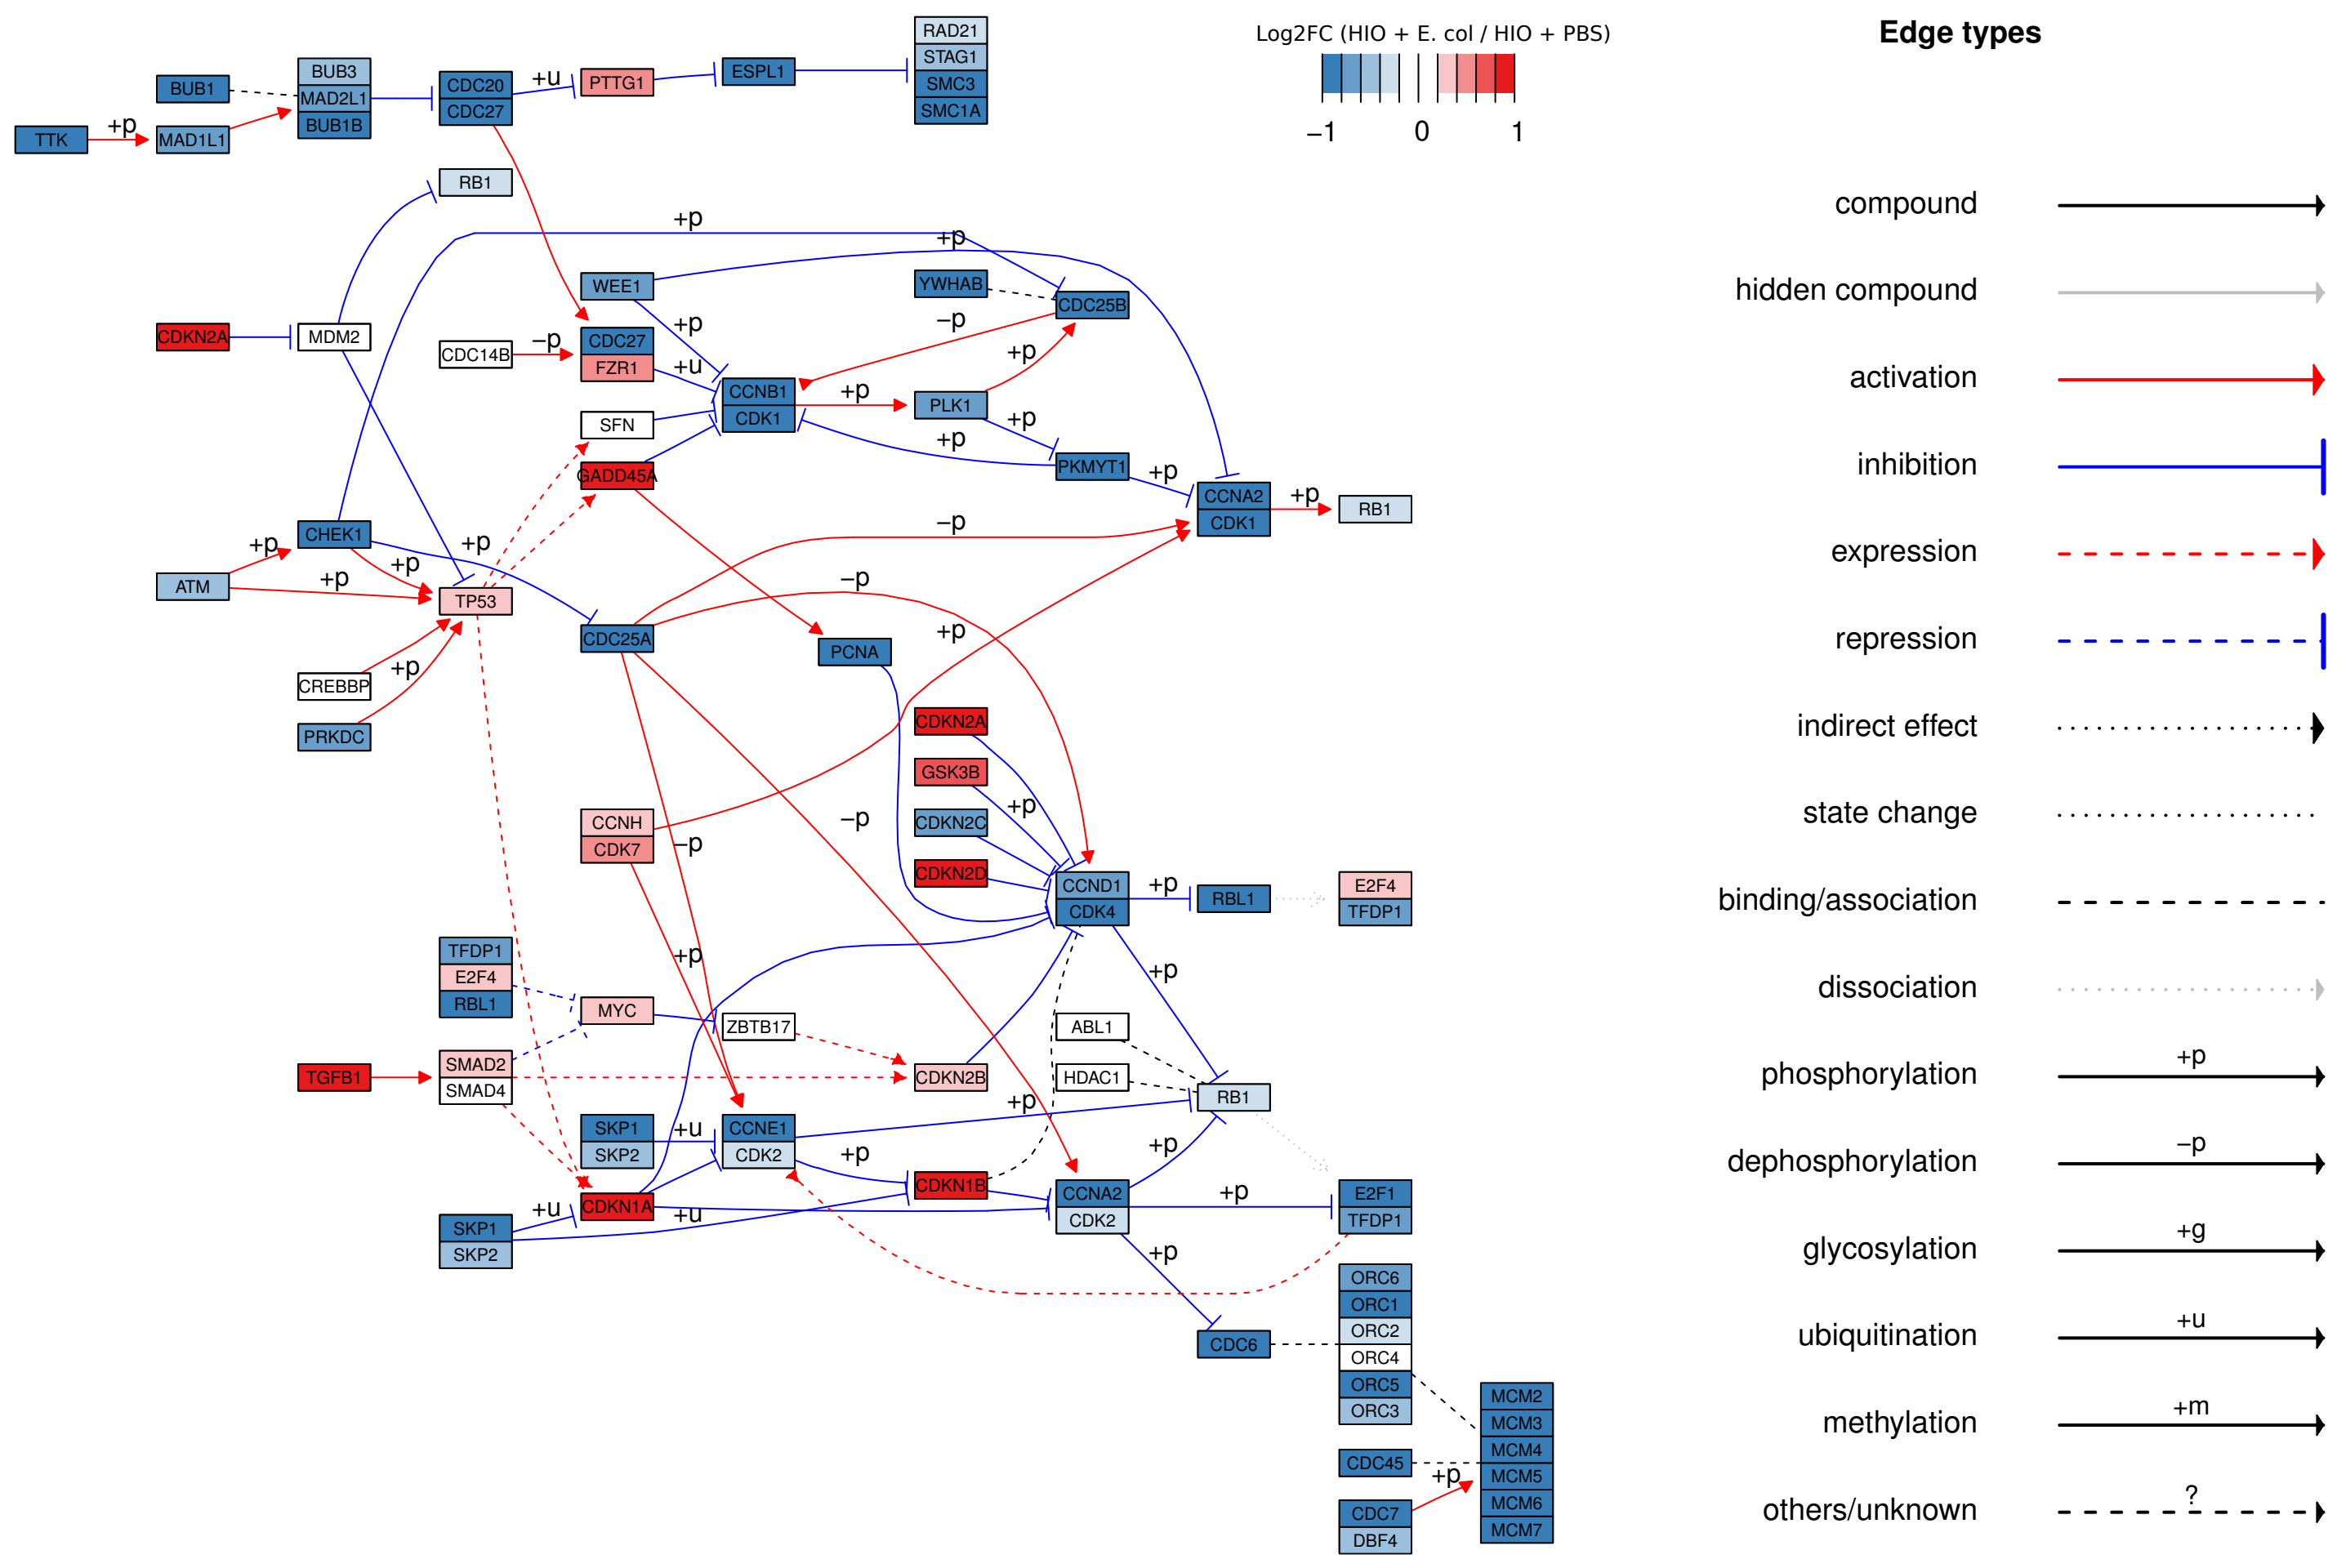

Supplement: supp [file elife_poa_e29132_Figure_3_figure_supplement_1.pdf › elife_poa_e29132_Figure_3_figure_supplement_1.pdf]

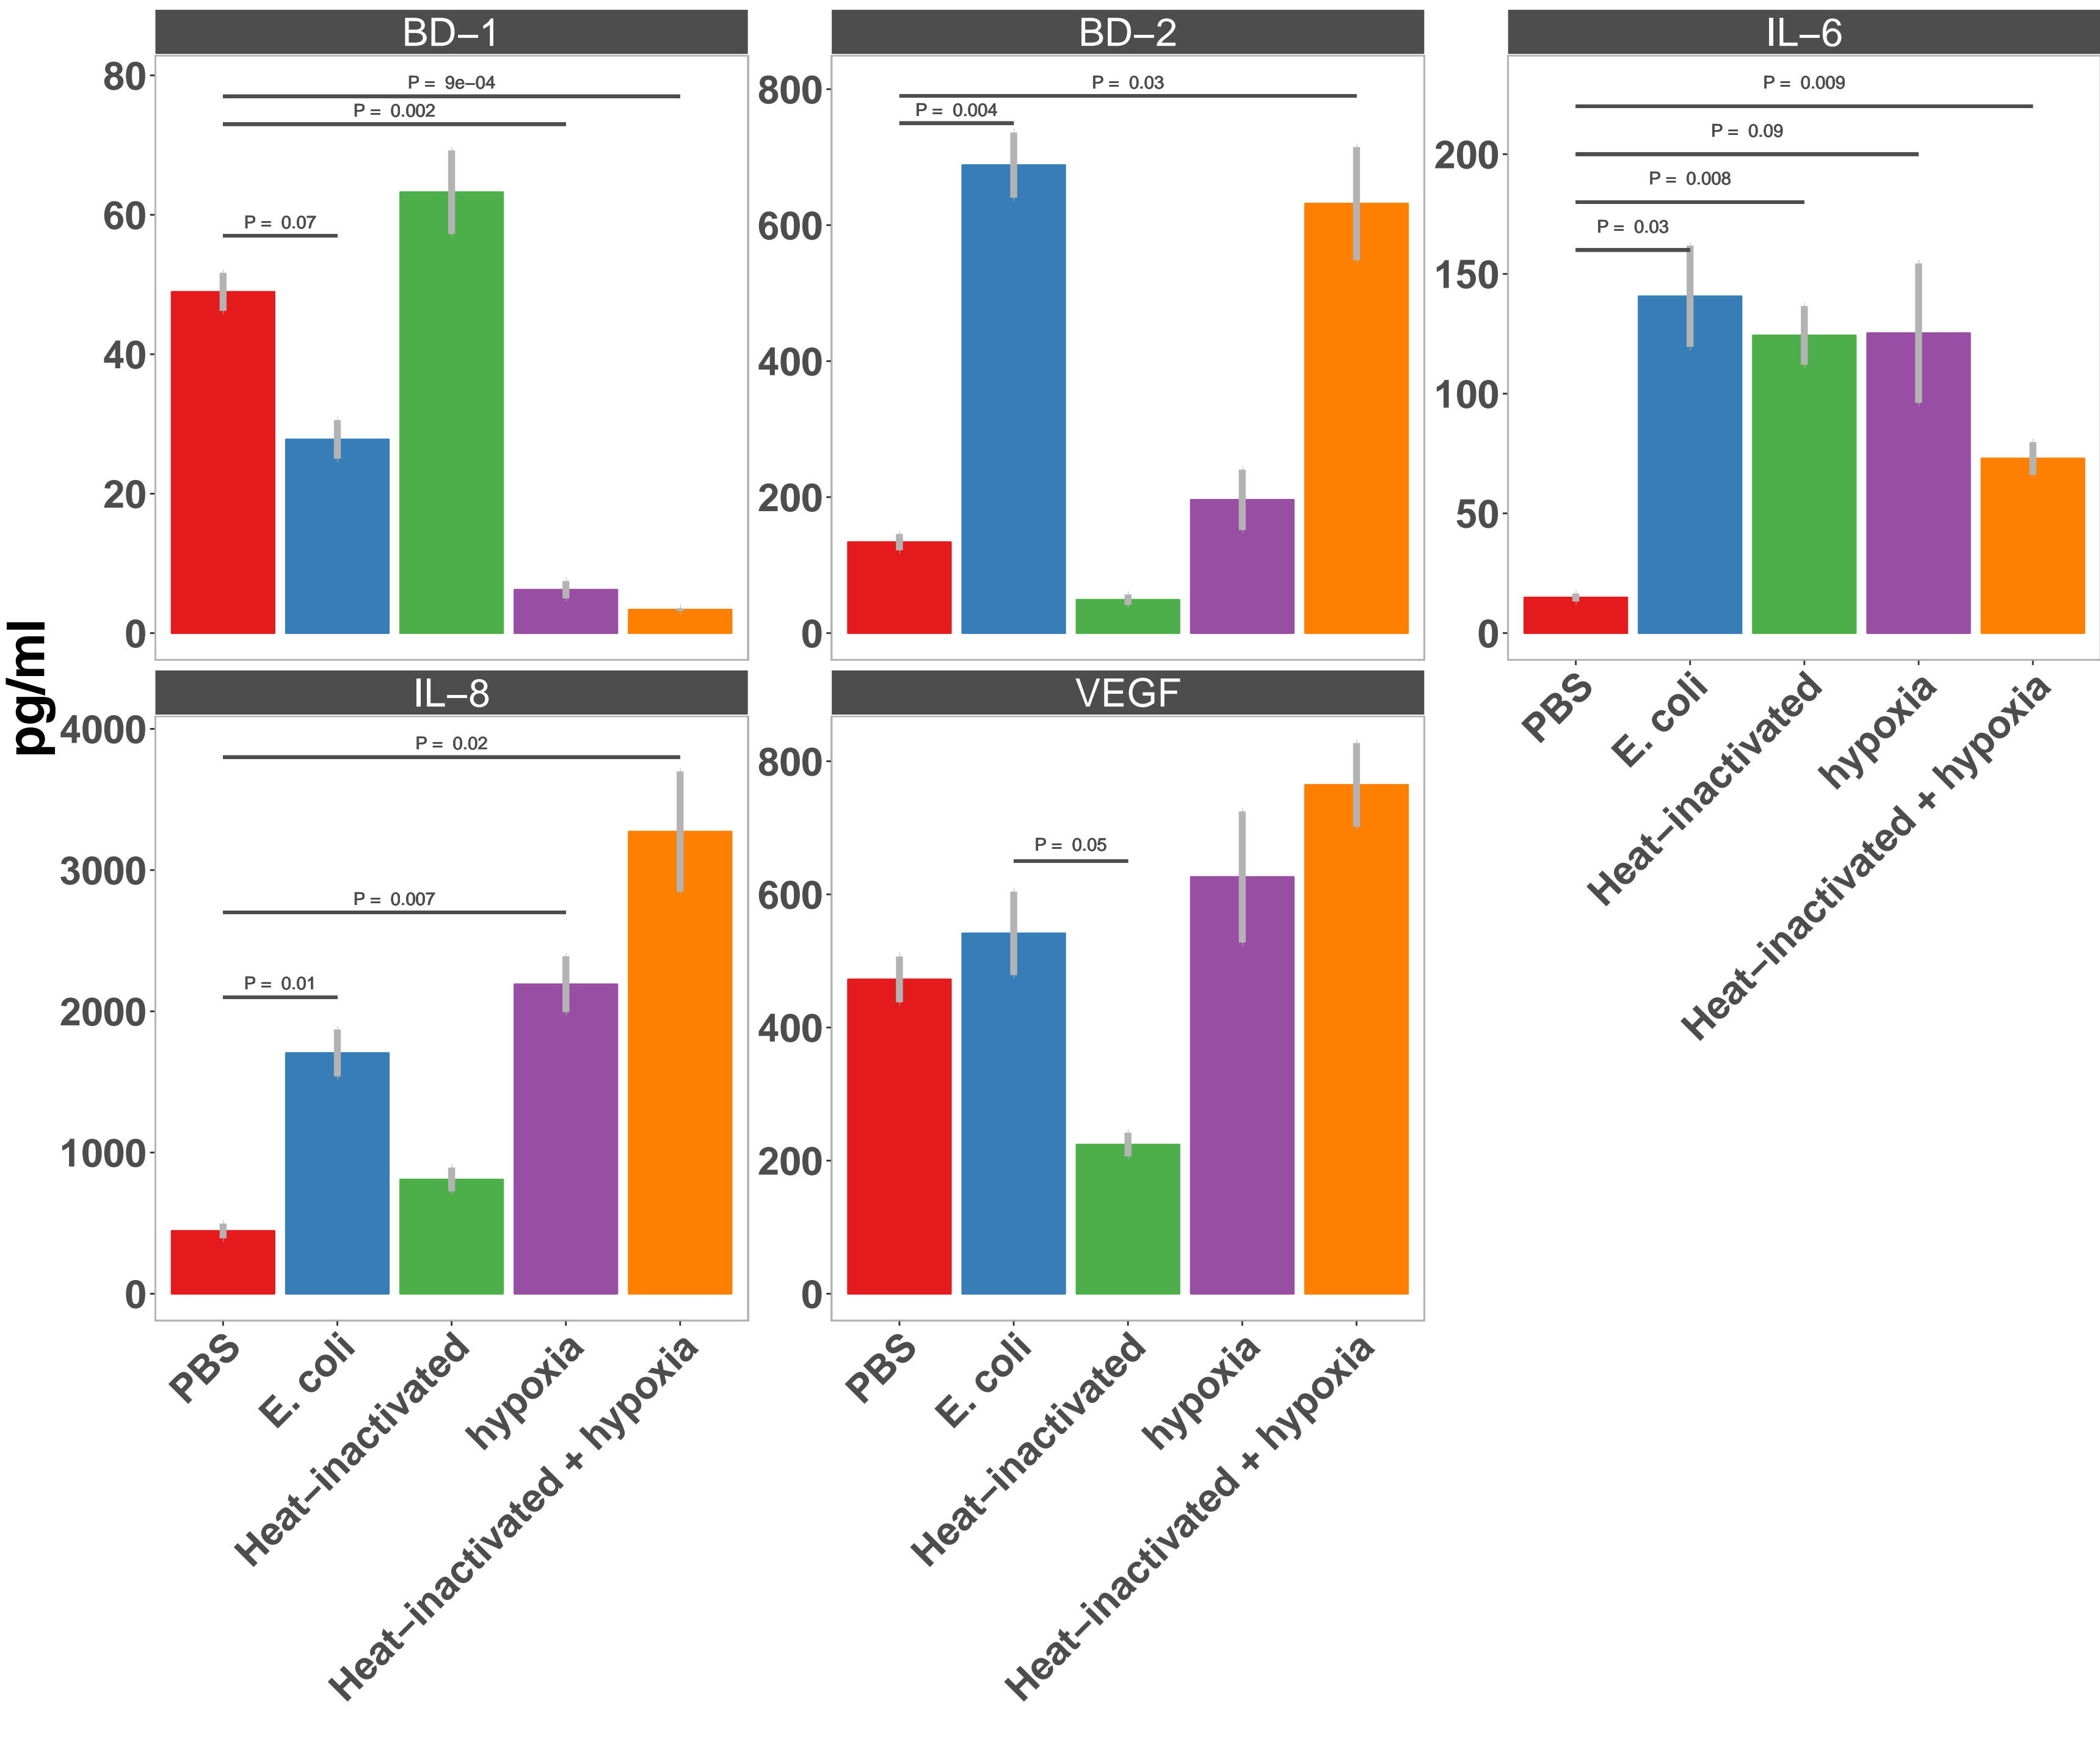

Supplement: supp [file elife_poa_e29132_Figure_5_figure_supplement_2.pdf › elife_poa_e29132_Figure_5_figure_supplement_2.pdf]

# DEFB4B

Log<sub>2</sub>FC

P = 0.006

5.0

2.5

0.0

E. coli

heat-inactivated

E. coli + SC-514

hypoxia

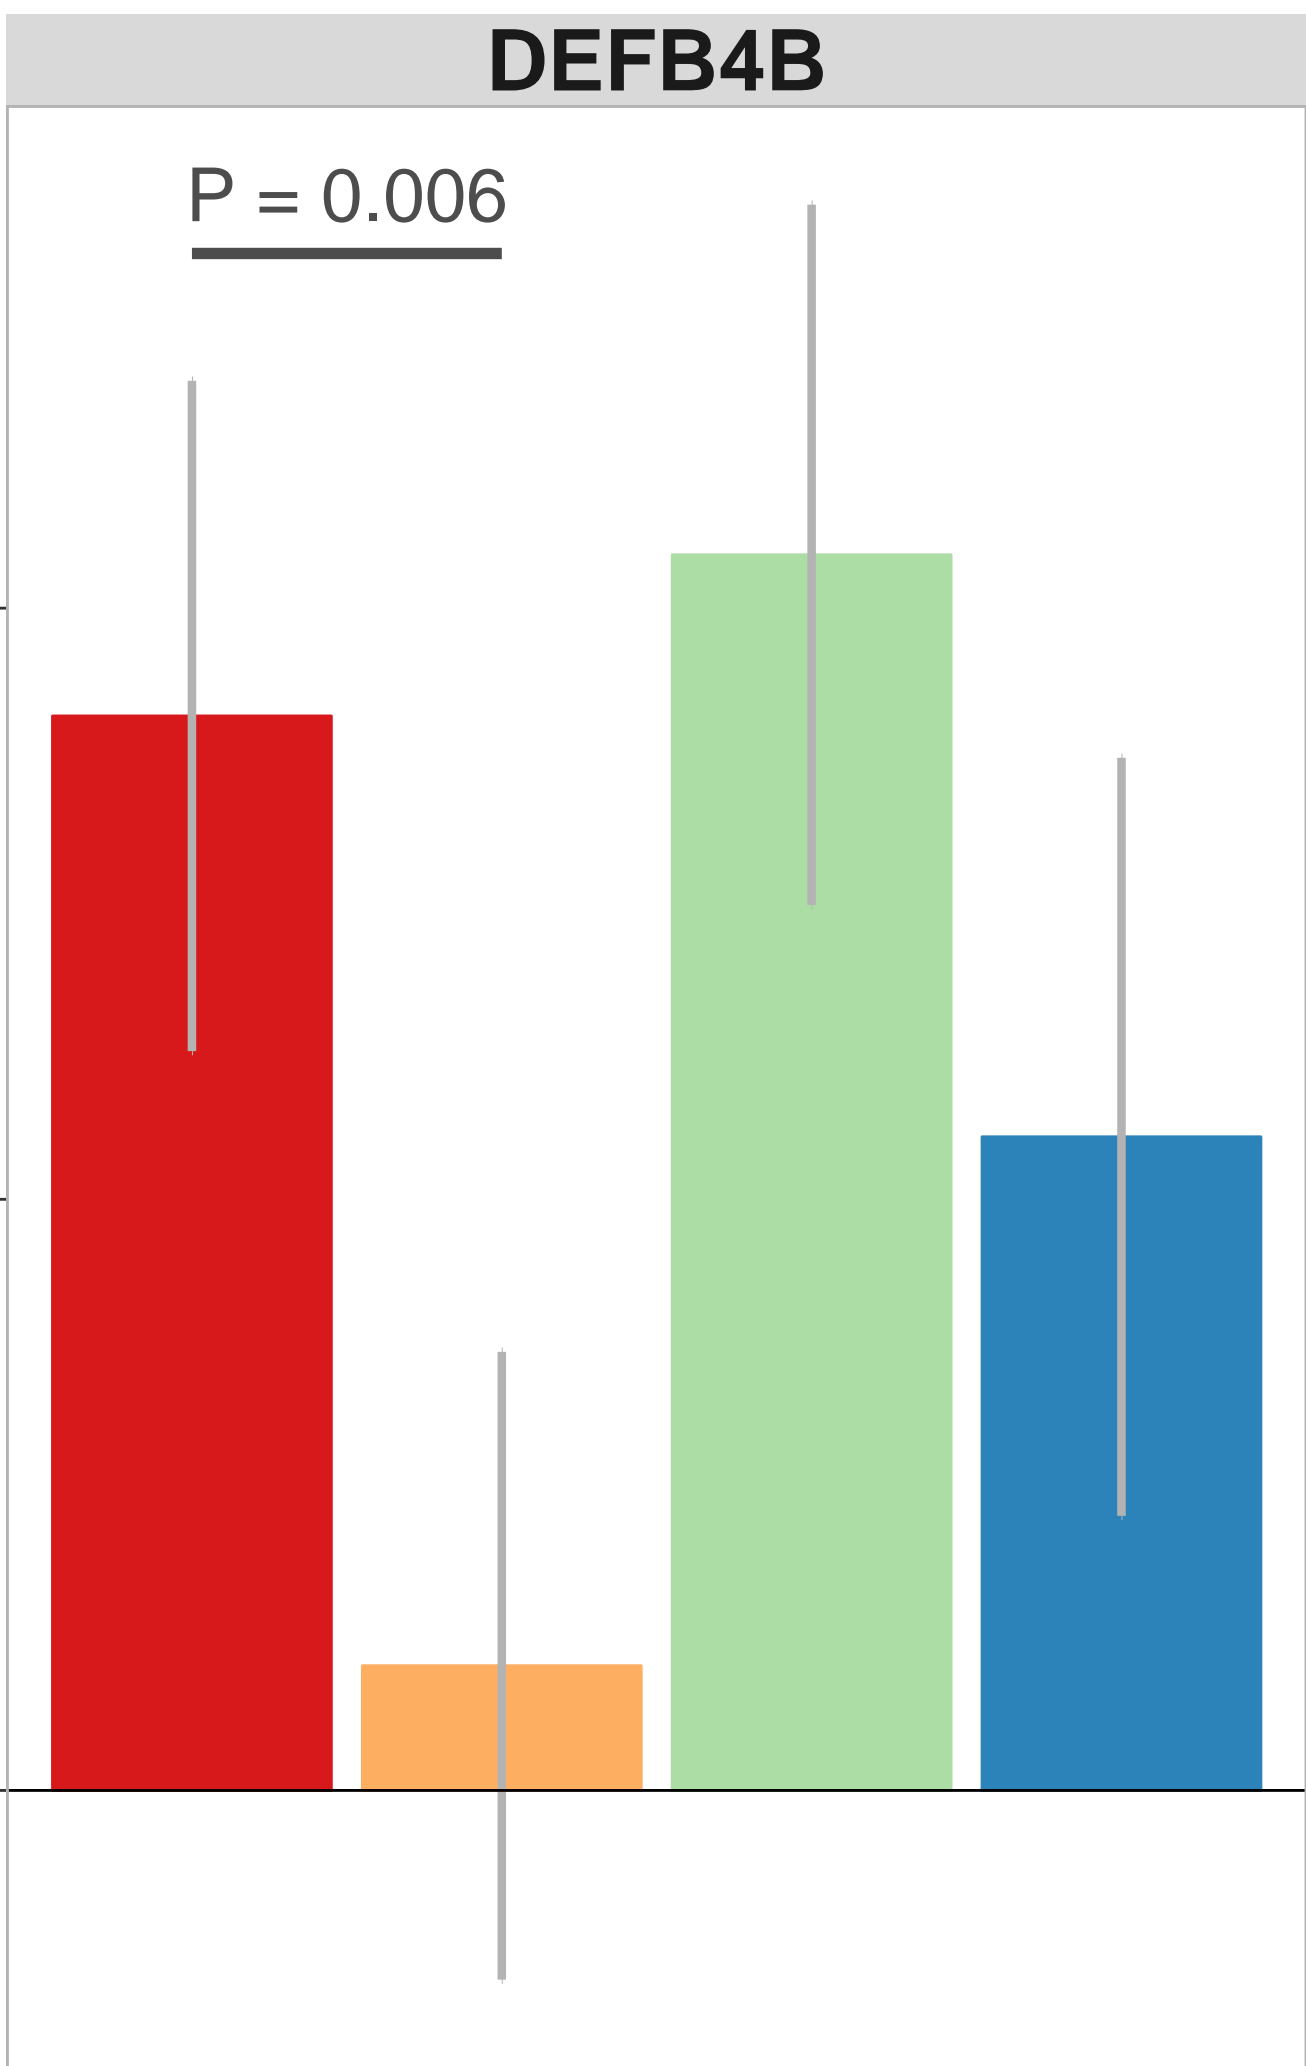

Supplement: supp [file elife_poa_e29132_Figure_6_figure_supplement_1.pdf › elife_poa_e29132_Figure_6_figure_supplement_1.pdf]

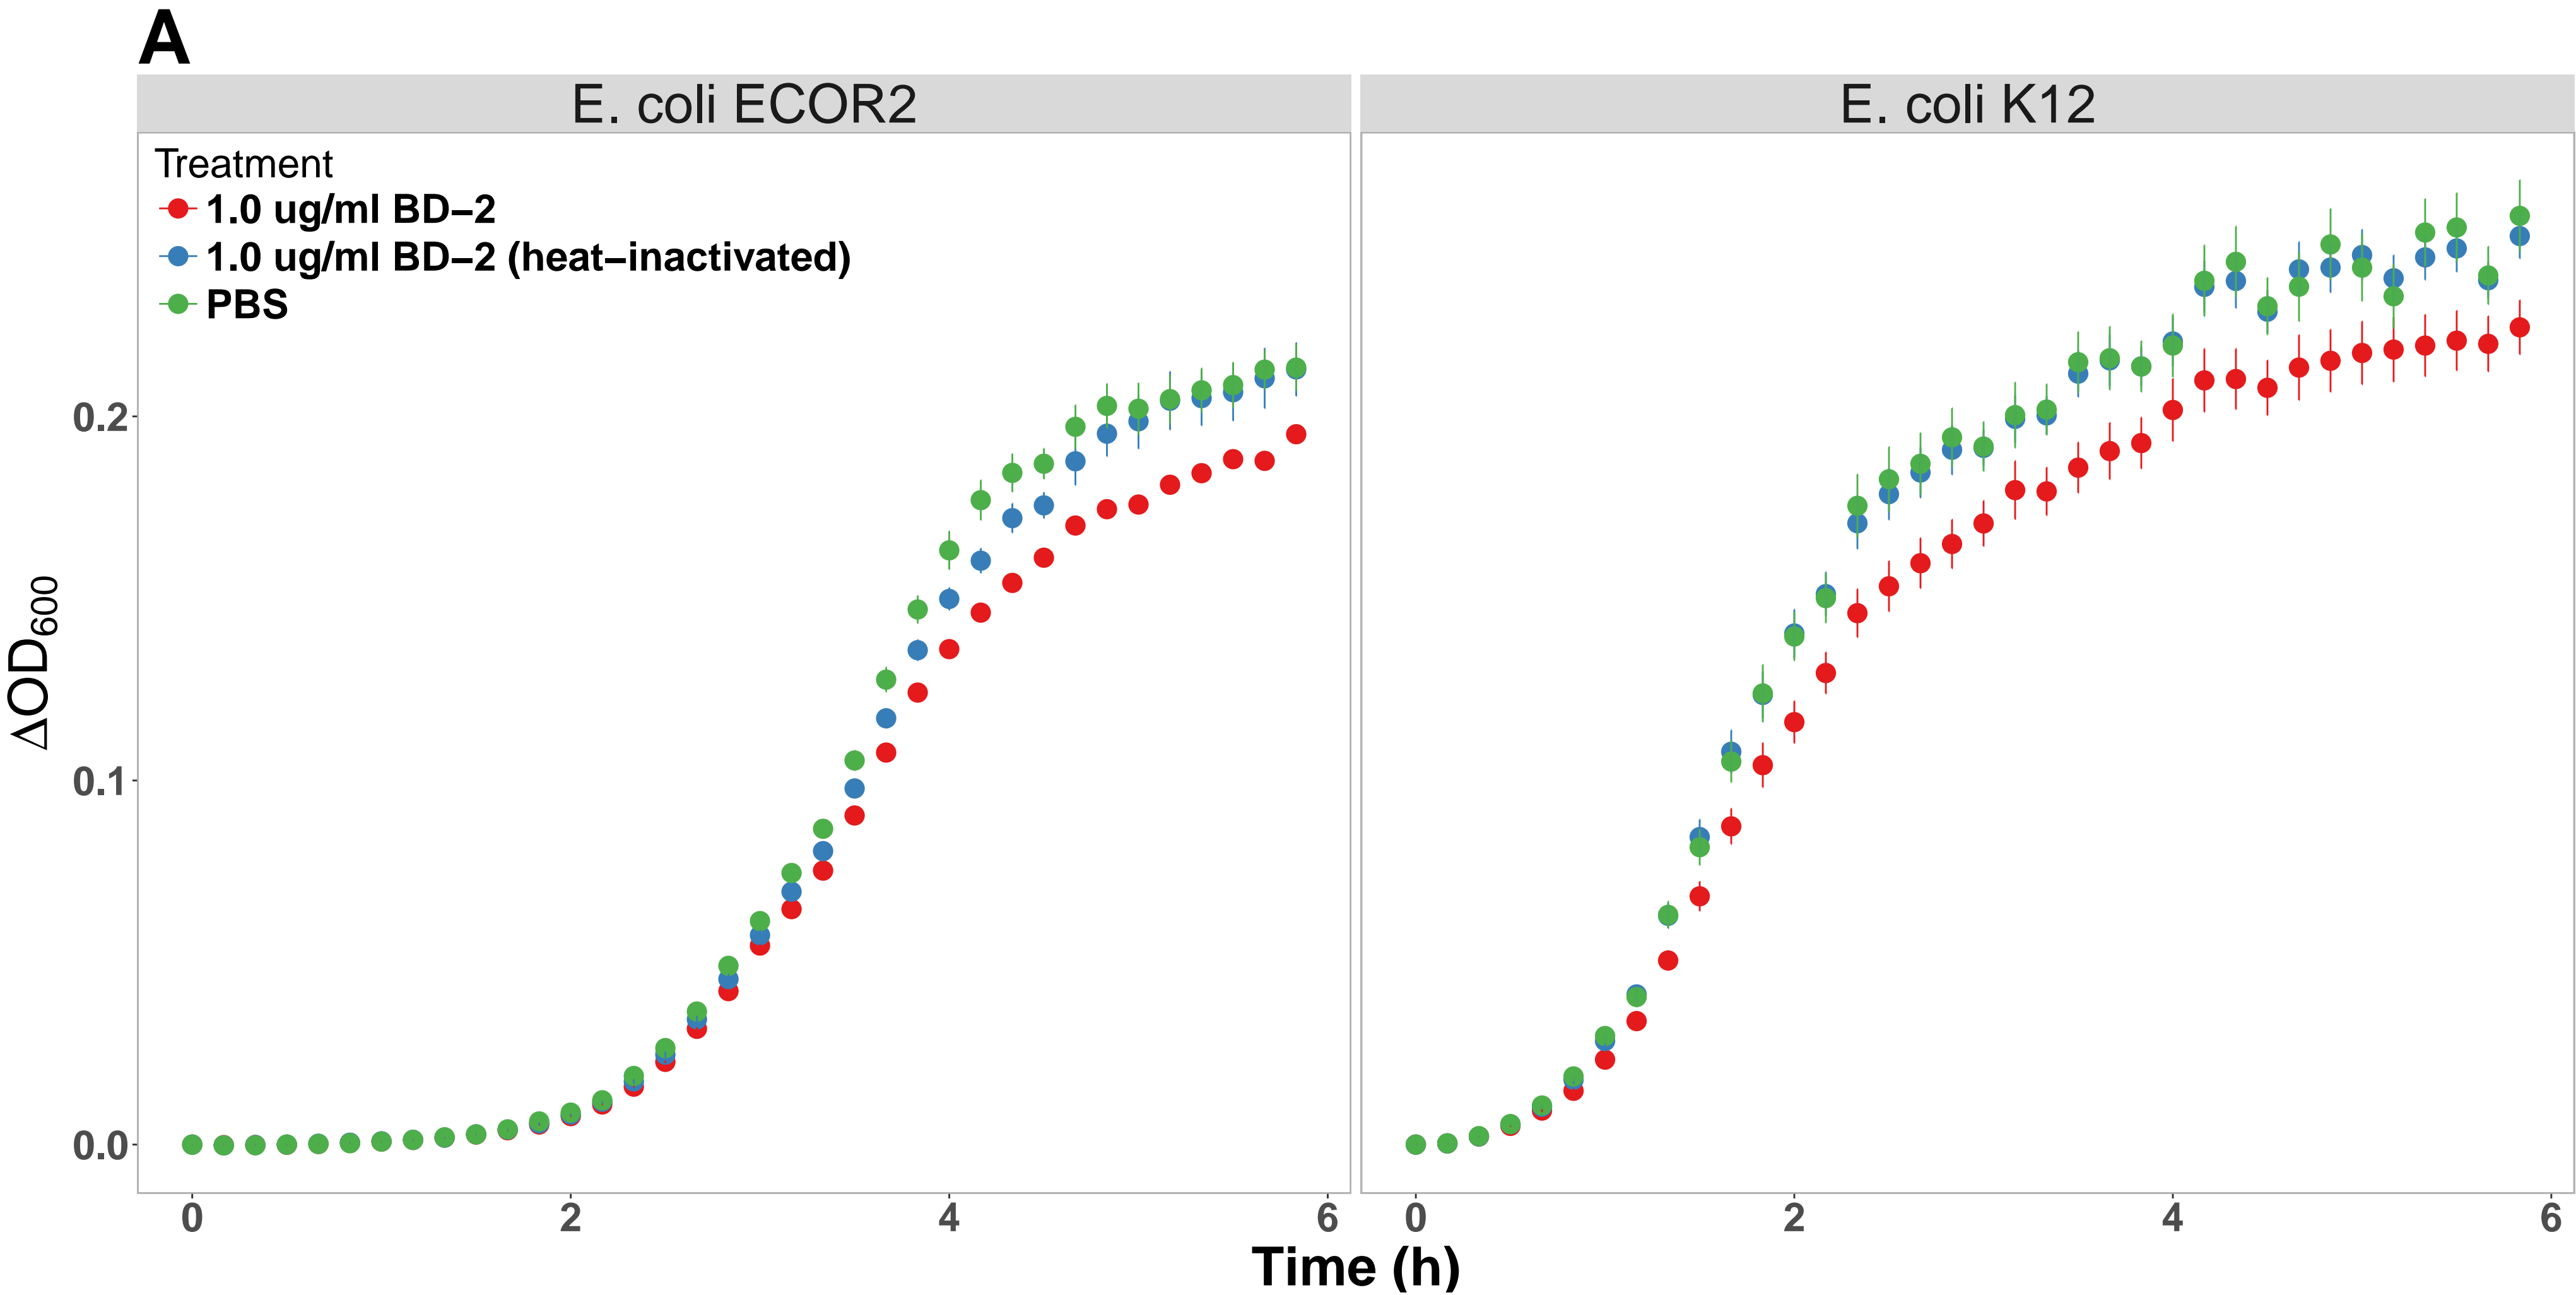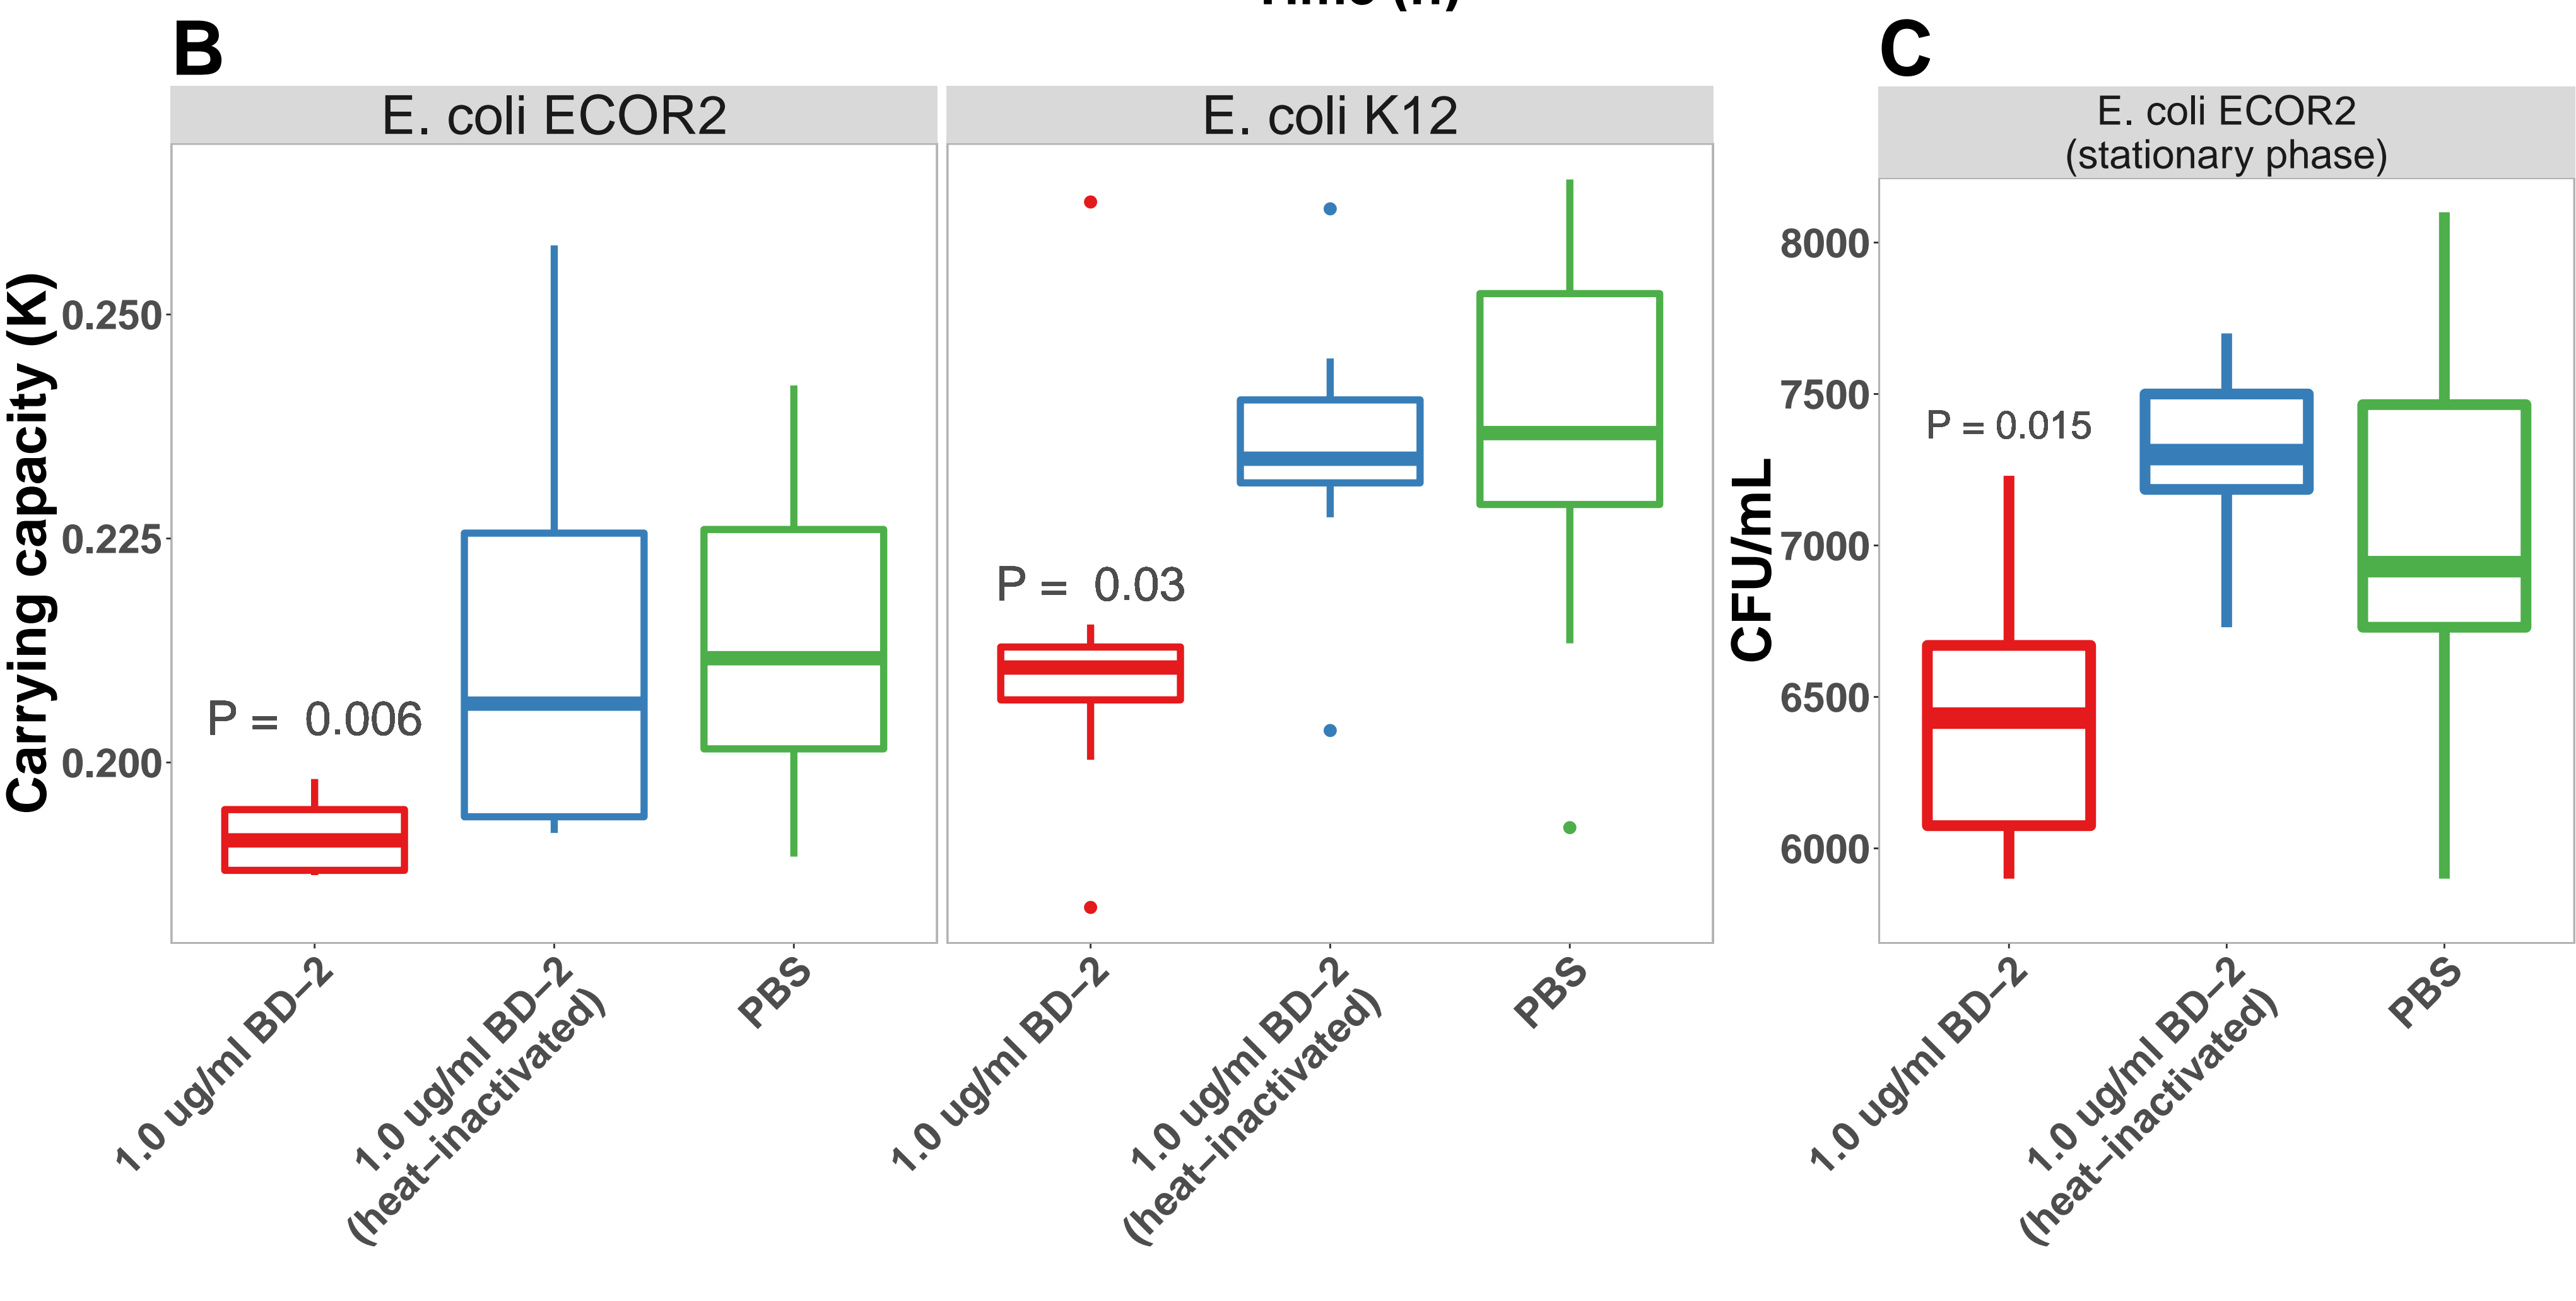

Supplement: supp [file elife_poa_e29132_Figure_6_figure_supplement_2.pdf › elife_poa_e29132_Figure_6_figure_supplement_2.pdf]

Mucin 2 UEA1 DAPI

PBS

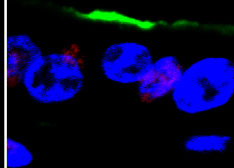

*E. coli*

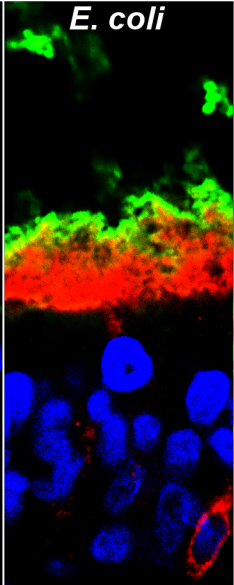

*E. coli*  
+ SC-514

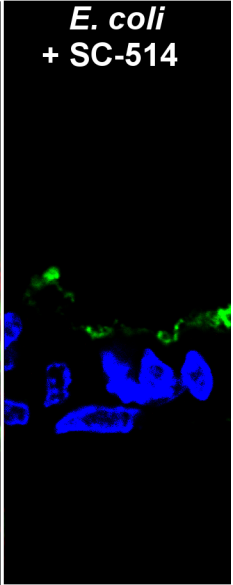

Supplement: supp [file elife_poa_e29132_Figure_7_figure_supplement_1.pdf › elife_poa_e29132_Figure_7_figure_supplement_1.pdf]

**A**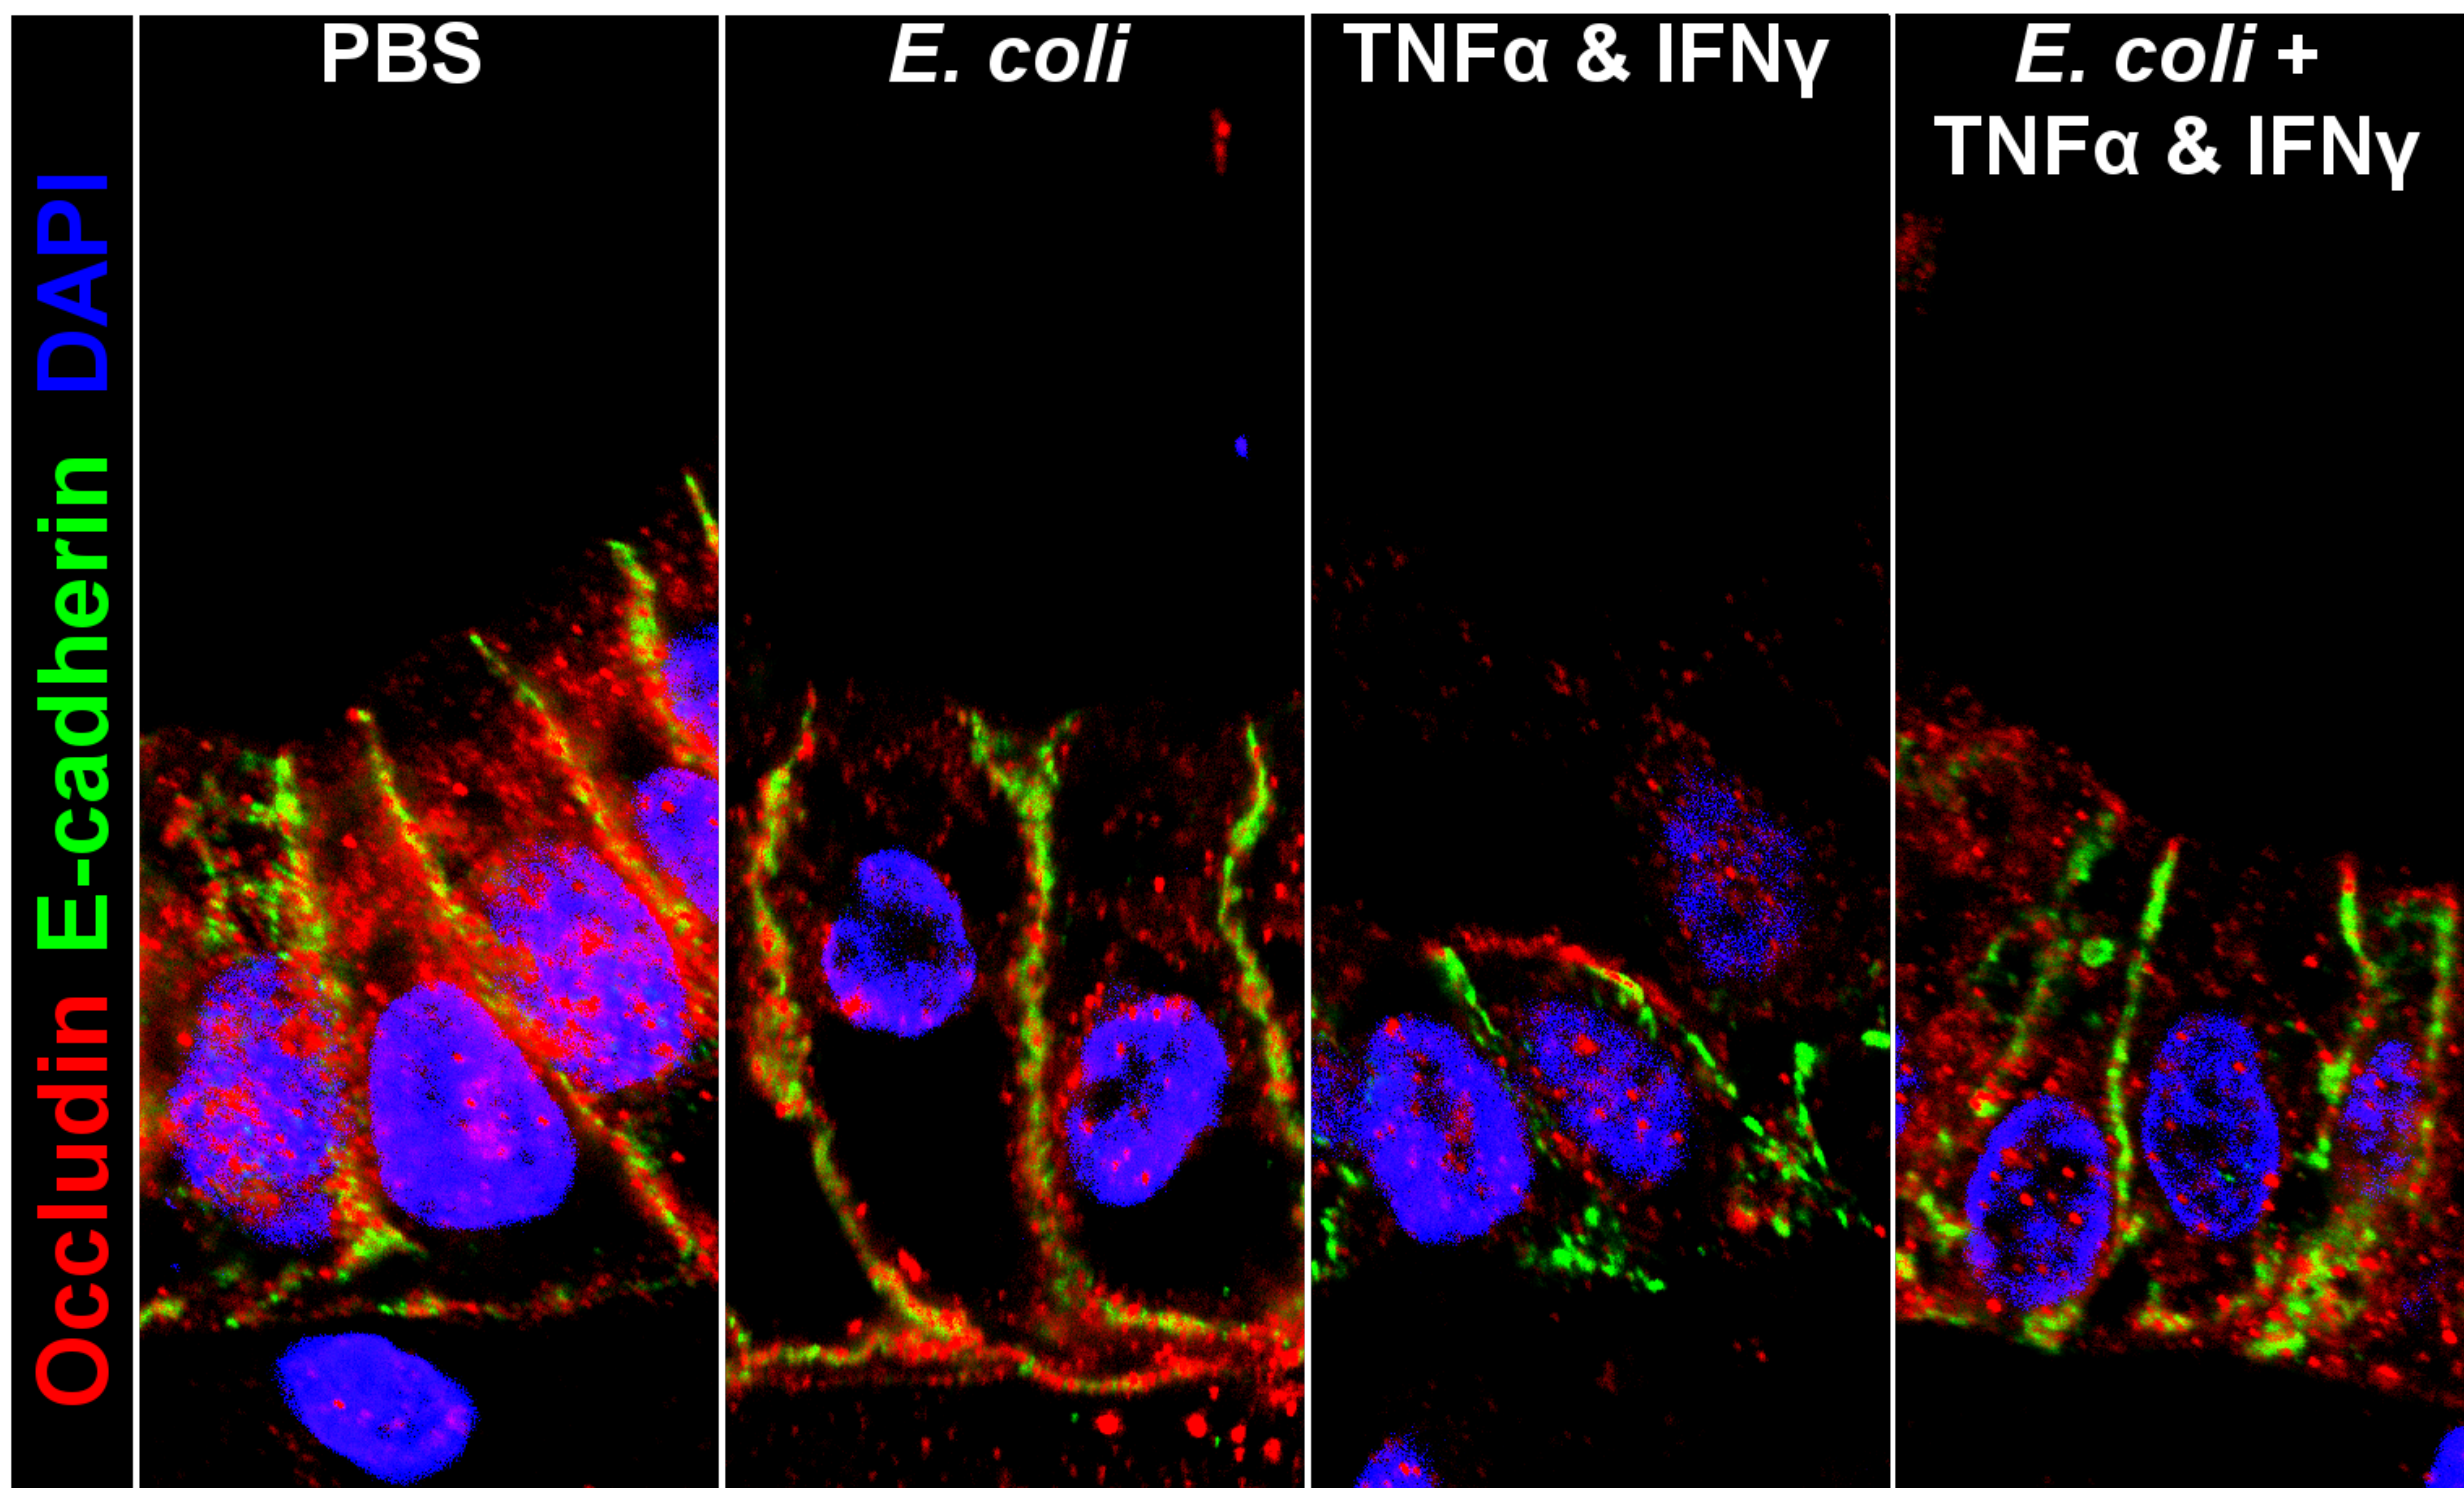**B**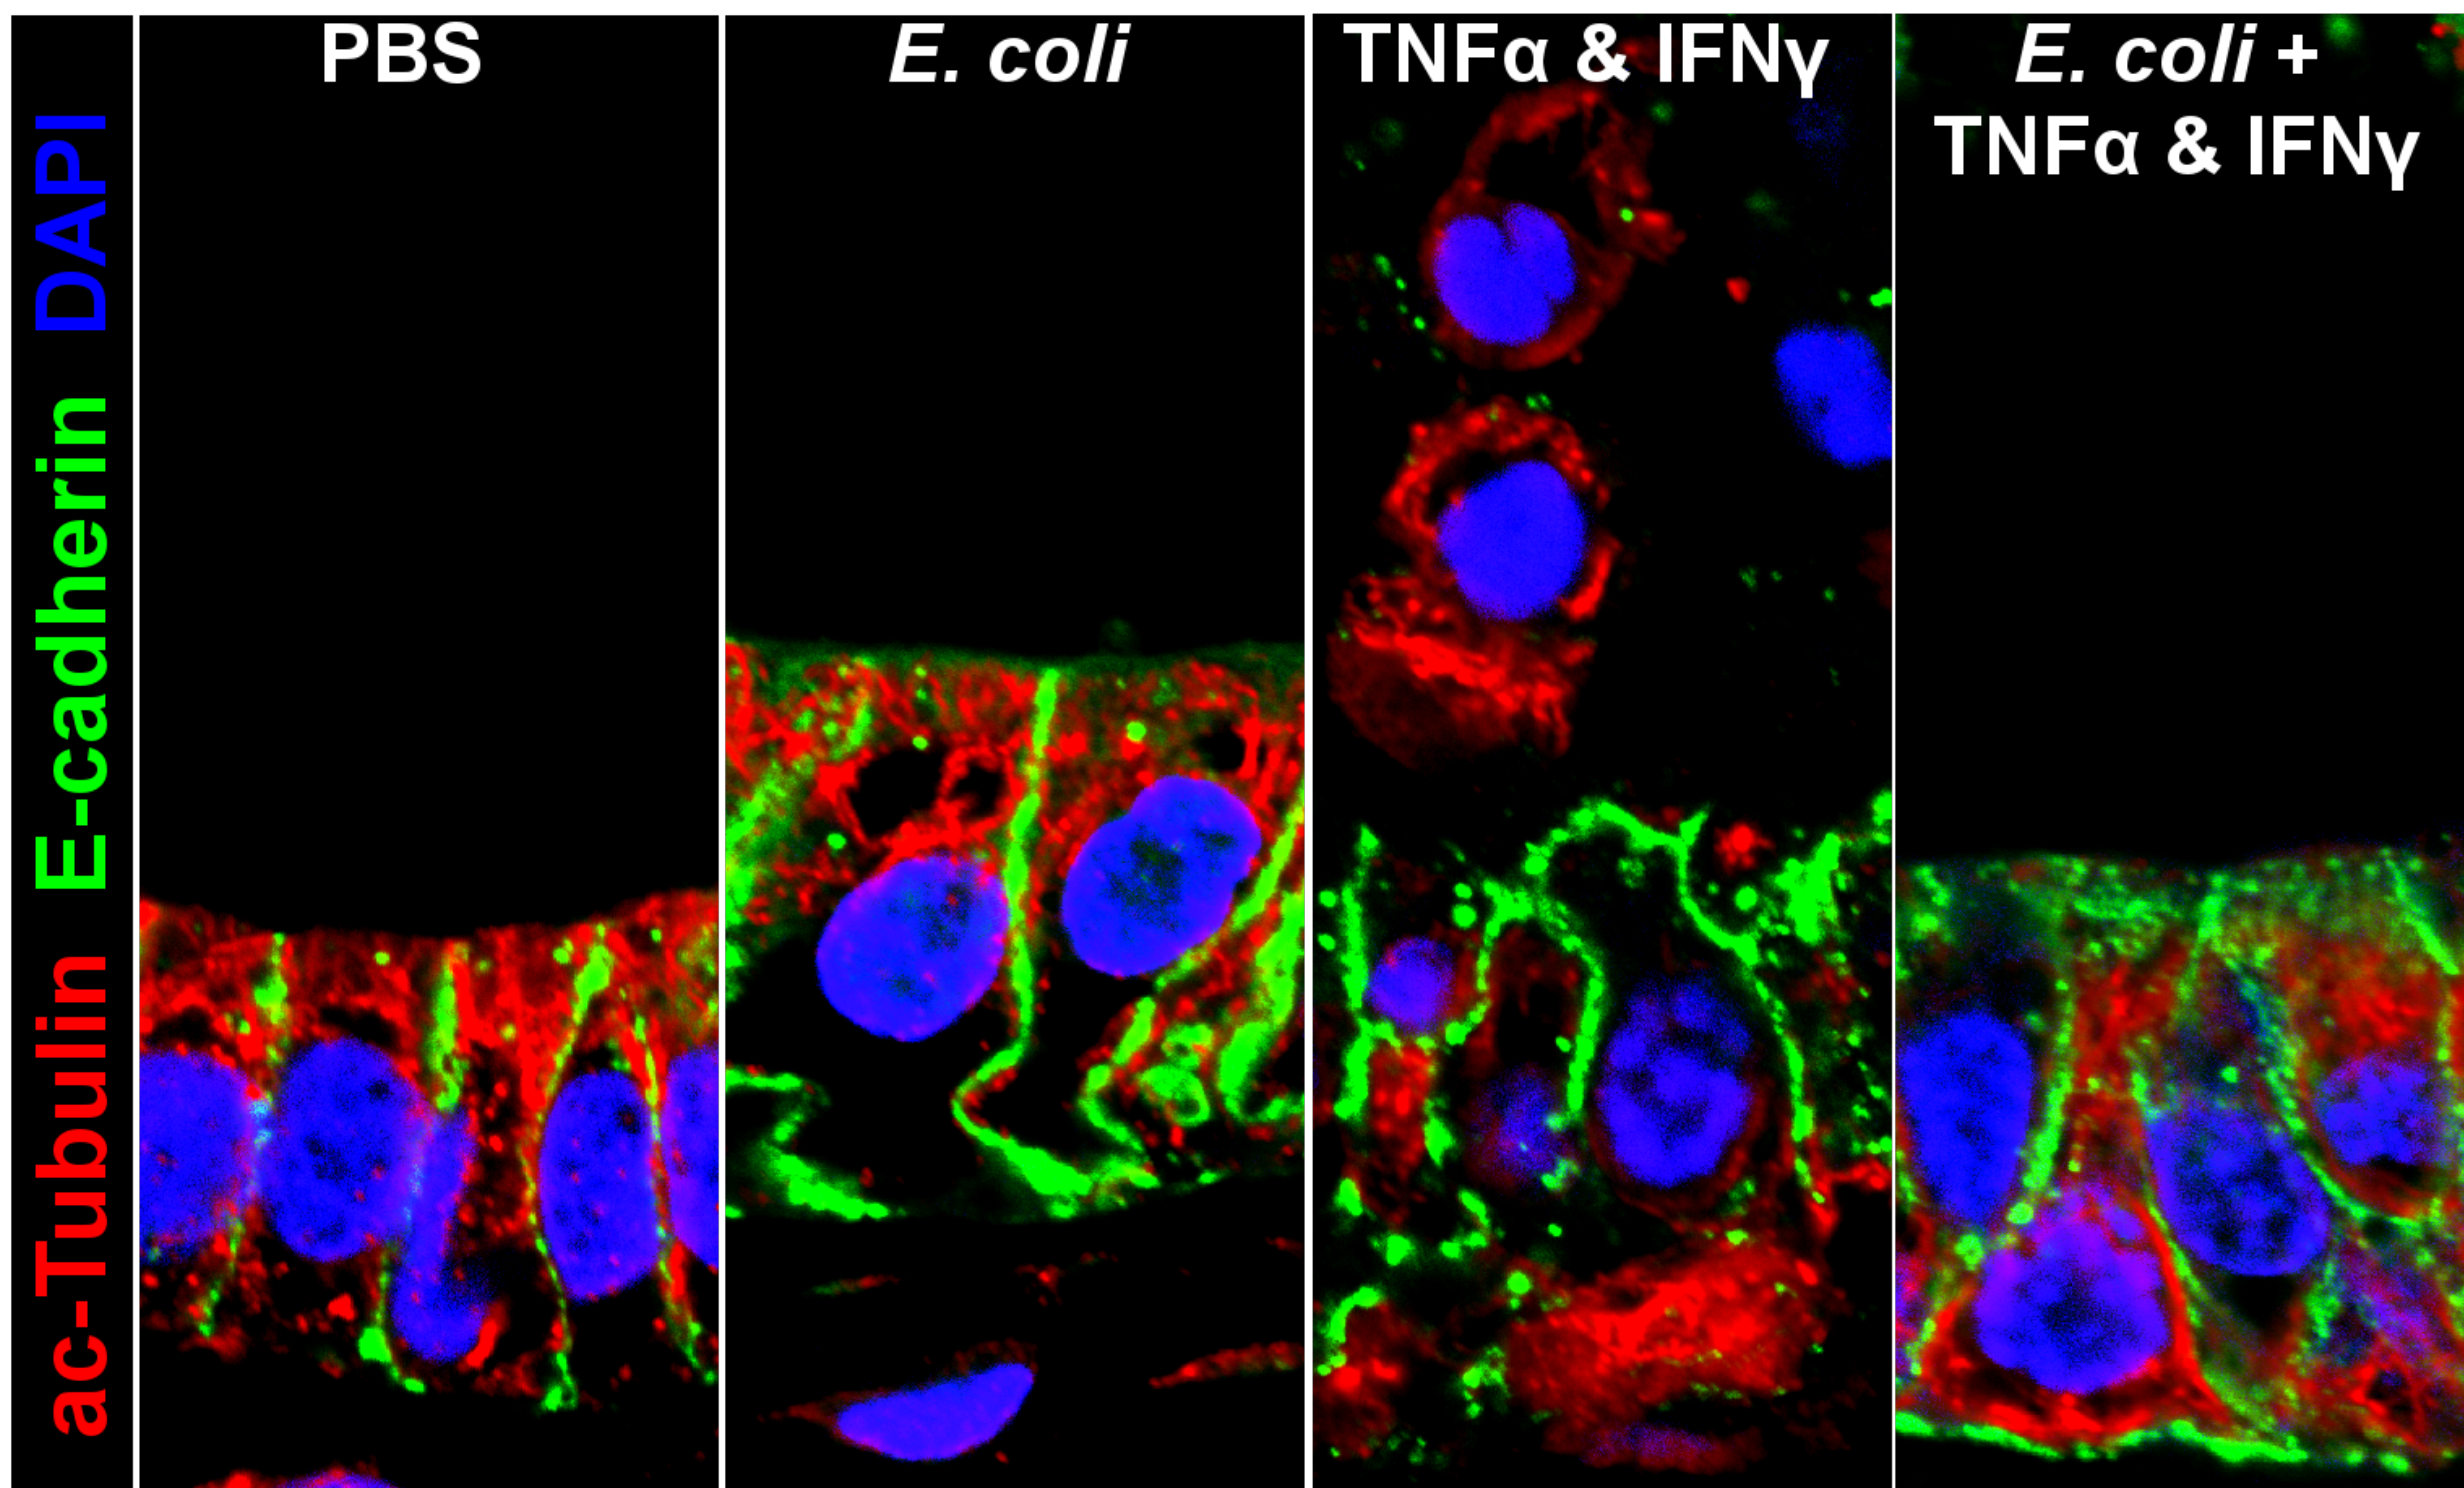

Supplement: supp [file elife_poa_e29132_Figure_8_figure_supplement_1.pdf › elife_poa_e29132_Figure_8_figure_supplement_1.pdf]
